# Supplementary material
Source: publisher figshare collection journal article supplement (https://acs.figshare.com/ndownloader/files/19666505)

# **Rhodium(III)-Catalyzed Diastereoselective Ring-Opening of 7-Azabenzonorbornadienes with Aromatic Ketoximes: Synthesis of Benzophenanthridine Derivatives**

Varathan Vinayagam, Arumugam Mariappan, Mrinmoy Jana and Masilamani Jeganmohan\*

*Department of Chemistry, Indian Institute of Technology Madras, Chennai 600036,  
Tamil Nadu, India*

*Email: mjeganmohan@iitm.ac.in*

## **Supporting Information (SI)**

### Table of Contents

|          |                                                                          |
|----------|--------------------------------------------------------------------------|
| S2 – S3  | X-Ray analysis Data                                                      |
| S4 – S5  | Mechanistic Investigation                                                |
| S6 – S75 | Copies of $^1\text{H}$ and $^{13}\text{C}$ NMR Spectra of All Compounds. |



## Crystallographic Data of Compound **3ba**:

Suitable single crystals for X-ray diffraction studies were obtained from the compound synthesized in this study. Single crystals were grown in a NMR tube at room temperature using CDCl<sub>3</sub> over a period of 3-4 weeks by slow evaporation of solvent.

X-ray data was collected with a Bruker AXS (Kappa Apex 2) CCD diffractometer equipped with graphite monochromatic Mo (K $\alpha$ ) ( $\lambda$  = 0.7107 Å) radiation source. The data were collected with 100% completeness for  $\Theta$  up to 25°.  $\omega$  and  $\phi$  scans were employed to collect the data. The frame width for  $\omega$  for was fixed to 0.5° for data collection. The crystal was solved by direct methods using Bruker SHELXS (Sheldrick, 1997). The Structure was refined using the Bruker SHELXTL (Version 6.12) software package. These data were deposited with Cambridge Crystallographic Data Center with the following numbers: **CCDC 1950036**.

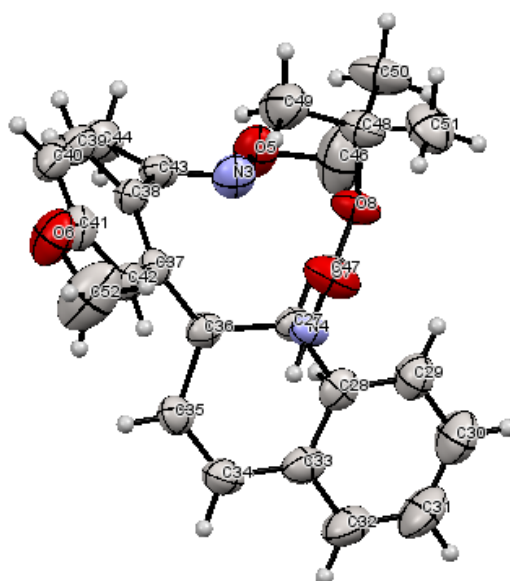

Figure S1: ORTEP representation of compound **3ba** displaying thermal ellipsoid at 50% probability.



**X-Ray Analysis of Compounds 3ba (the crystal is having dimeric compound).**

|                                         |                                                                    |                            |
|-----------------------------------------|--------------------------------------------------------------------|----------------------------|
| Identification code                     | <b>3ba</b>                                                         |                            |
| Empirical formula                       | $C_{50} H_{61} N_4 O_8$                                            |                            |
| Formula weight                          | 846.02                                                             |                            |
| Temperature                             | 296(2) K                                                           |                            |
| Wavelength                              | 71.073 pm                                                          |                            |
| Crystal system                          | Triclinic                                                          |                            |
| Space group                             | P -1                                                               |                            |
| Unit cell dimensions                    | $a = 1114.05(16) \text{ pm}$                                       | $\alpha = 89.364(5)^\circ$ |
|                                         | $b = 1469.54(16) \text{ pm}$                                       | $\beta = 79.407(4)^\circ$  |
|                                         | $c = 1523.2(2) \text{ pm}$                                         | $\gamma = 75.874(4)^\circ$ |
| Volume                                  | $2.3756(6) \text{ nm}^3$                                           |                            |
| Z                                       | 2                                                                  |                            |
| Density (calculated)                    | $1.183 \text{ Mg/m}^3$                                             |                            |
| Absorption coefficient                  | $0.080 \text{ mm}^{-1}$                                            |                            |
| F(000)                                  | 906                                                                |                            |
| Crystal size                            | $0.250 \times 0.220 \times 0.150 \text{ mm}^3$                     |                            |
| Theta range for data collection         | $1.361$ to $24.292^\circ$                                          |                            |
| Index ranges                            | $-12 \leq h \leq 12$ , $-16 \leq k \leq 16$ , $-17 \leq l \leq 17$ |                            |
| Reflections collected                   | 28630                                                              |                            |
| Independent reflections                 | 7586 [ $R(\text{int}) = 0.0592$ ]                                  |                            |
| Completeness to $\theta = 24.292^\circ$ | 98.3 %                                                             |                            |
| Absorption correction                   | None                                                               |                            |
| Refinement method                       | Full-matrix least-squares on $F^2$                                 |                            |
| Data / restraints / parameters          | 7586 / 0 / 580                                                     |                            |
| Goodness-of-fit on $F^2$                | 1.062                                                              |                            |
| Final R indices [ $I > 2\sigma(I)$ ]    | $R1 = 0.0609$ , $wR2 = 0.1617$                                     |                            |
| R indices (all data)                    | $R1 = 0.1138$ , $wR2 = 0.1996$                                     |                            |
| Extinction coefficient                  | $0.0043(11)$                                                       |                            |
| Largest diff. peak and hole             | $0.214$ and $-0.591 \text{ e.}\text{\AA}^{-3}$                     |                            |



$^1\text{H}$  Spectra of Compound **D-1c** ( $\text{CDCl}_3$  was used).

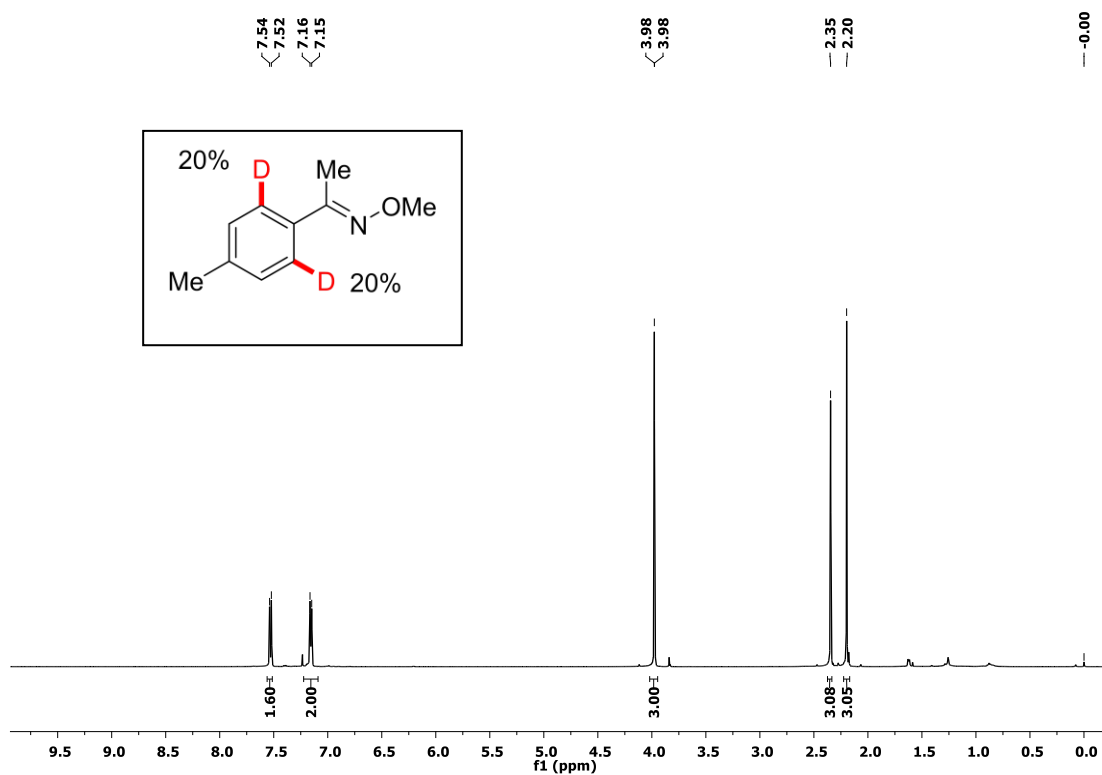

$^1\text{H}$  Spectra of Compound **D-3ca** ( $\text{CDCl}_3$  was used).

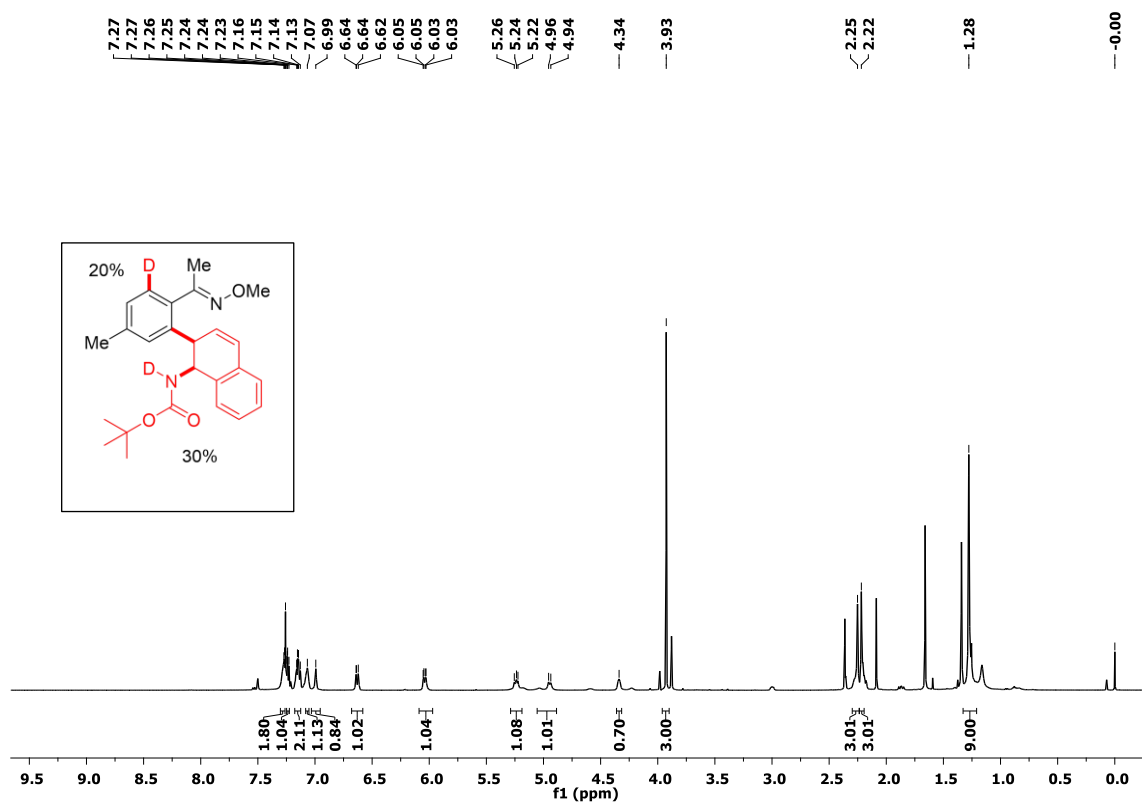



## Isolation of intermediate B.

### $^1\text{H}$ and $^{13}\text{C}$ NMR Spectra of Compound B

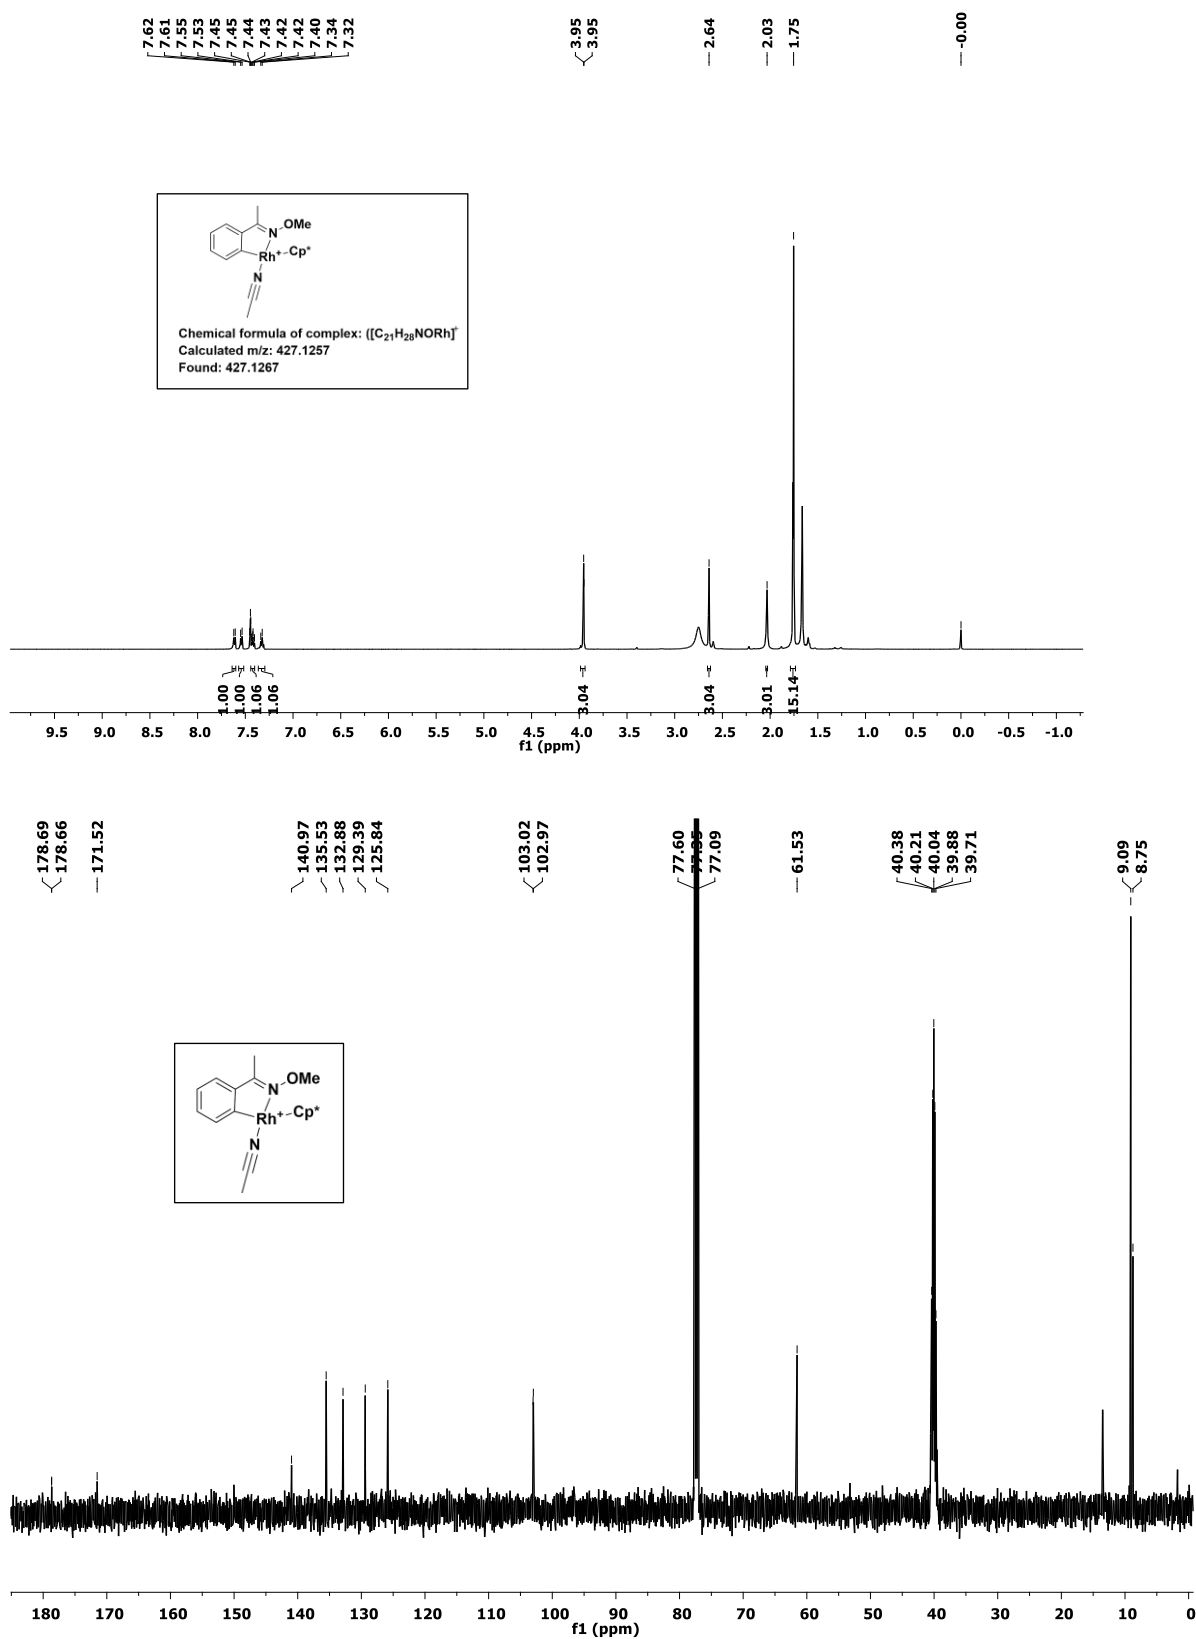



$^1\text{H}$  and  $^{13}\text{C}$  NMR Spectra of Compound **3aa**.

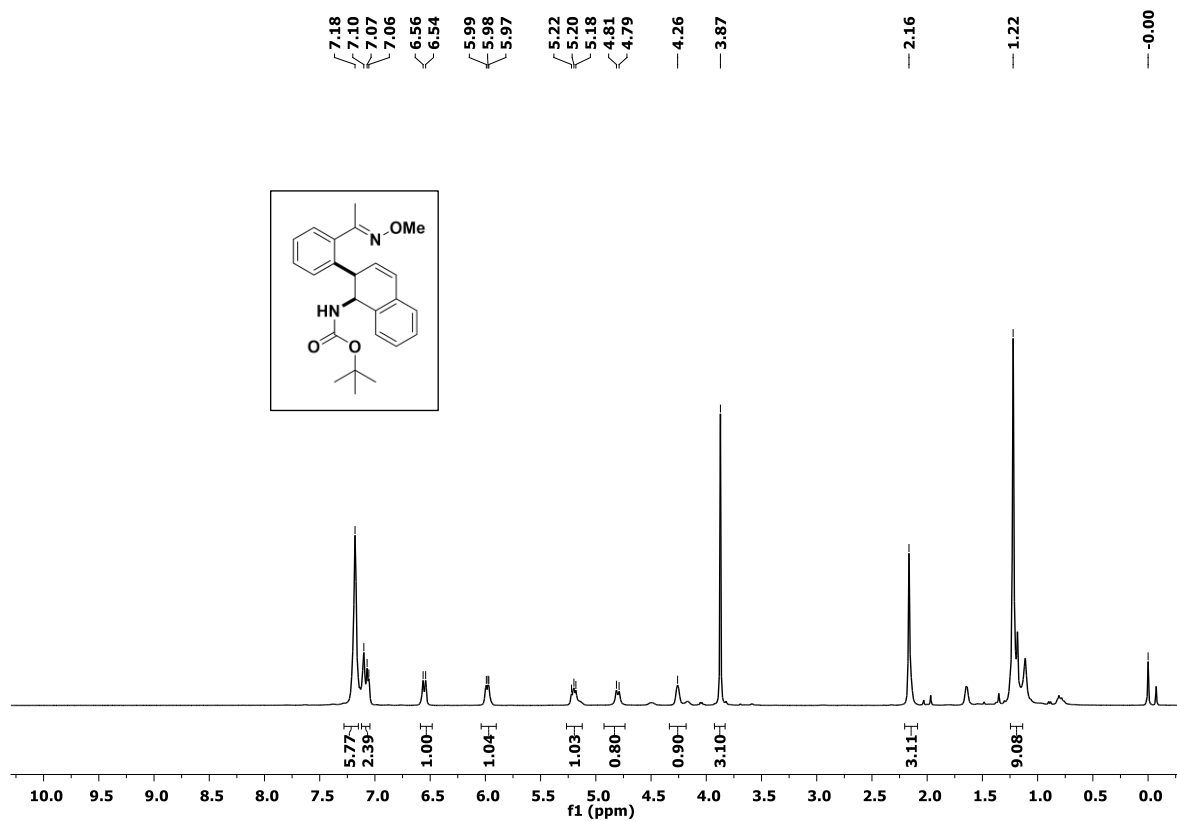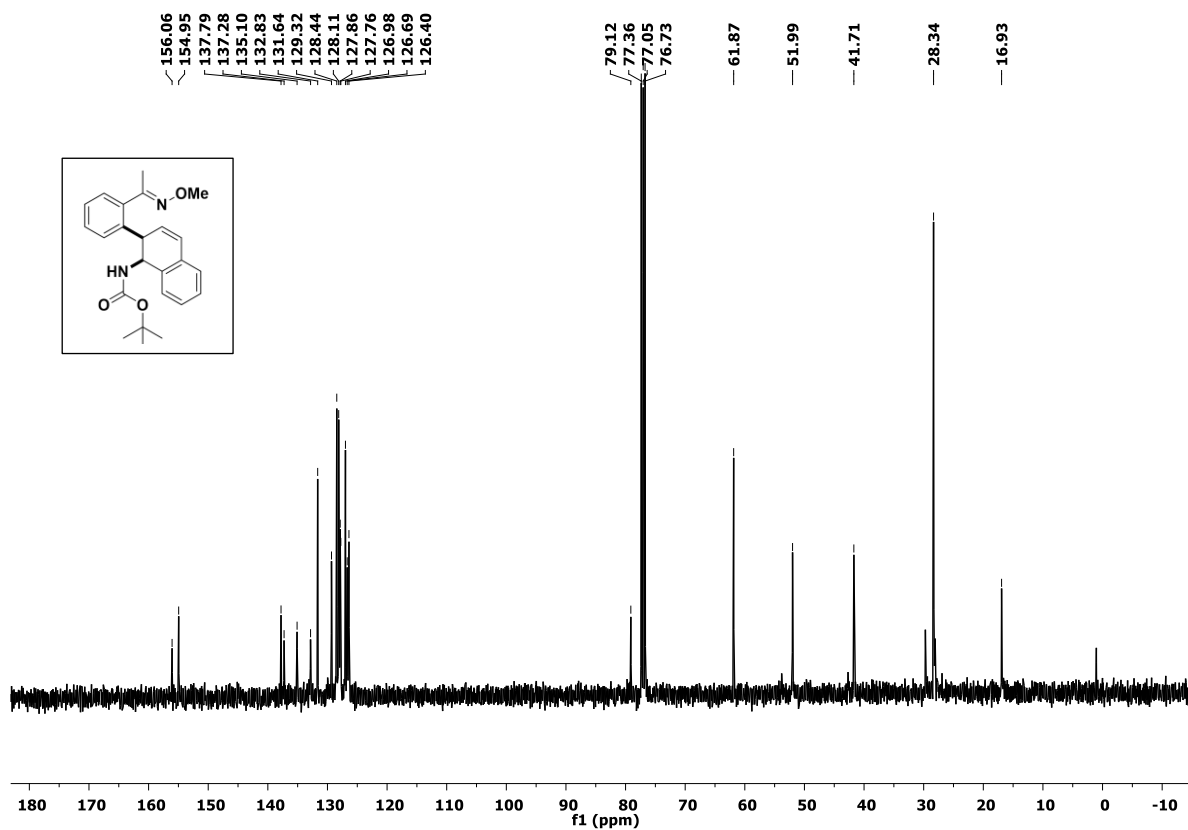



DEPT (135) NMR Spectrum of Compound **3aa**.

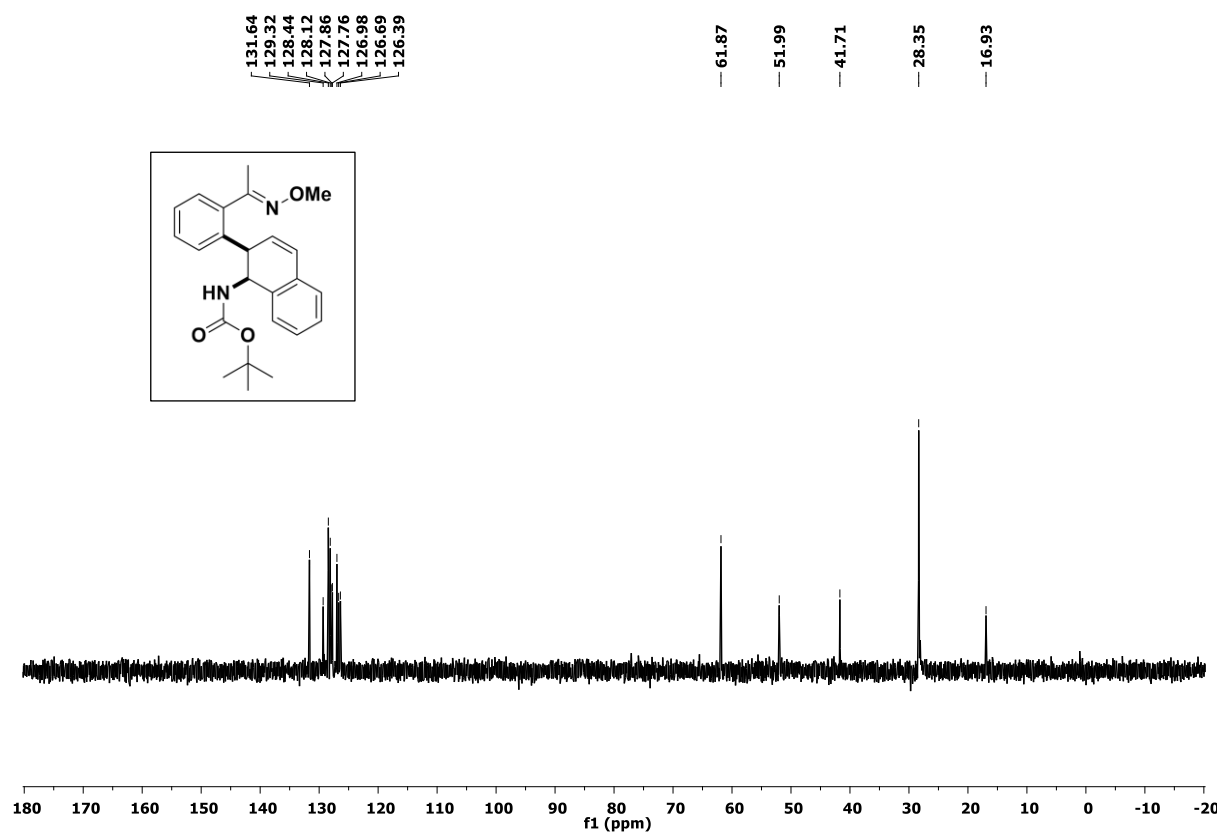



$^1\text{H}$  and  $^{13}\text{C}$  NMR Spectra of Compound **3ba**.

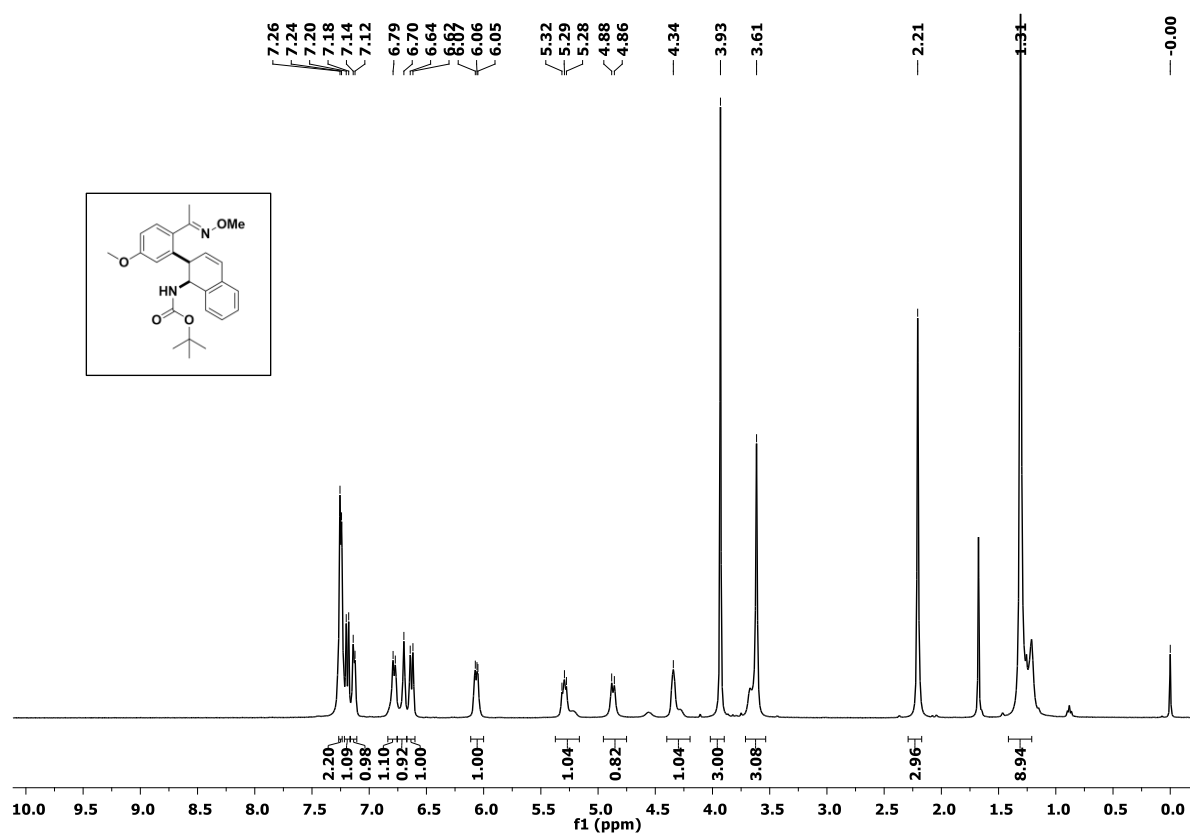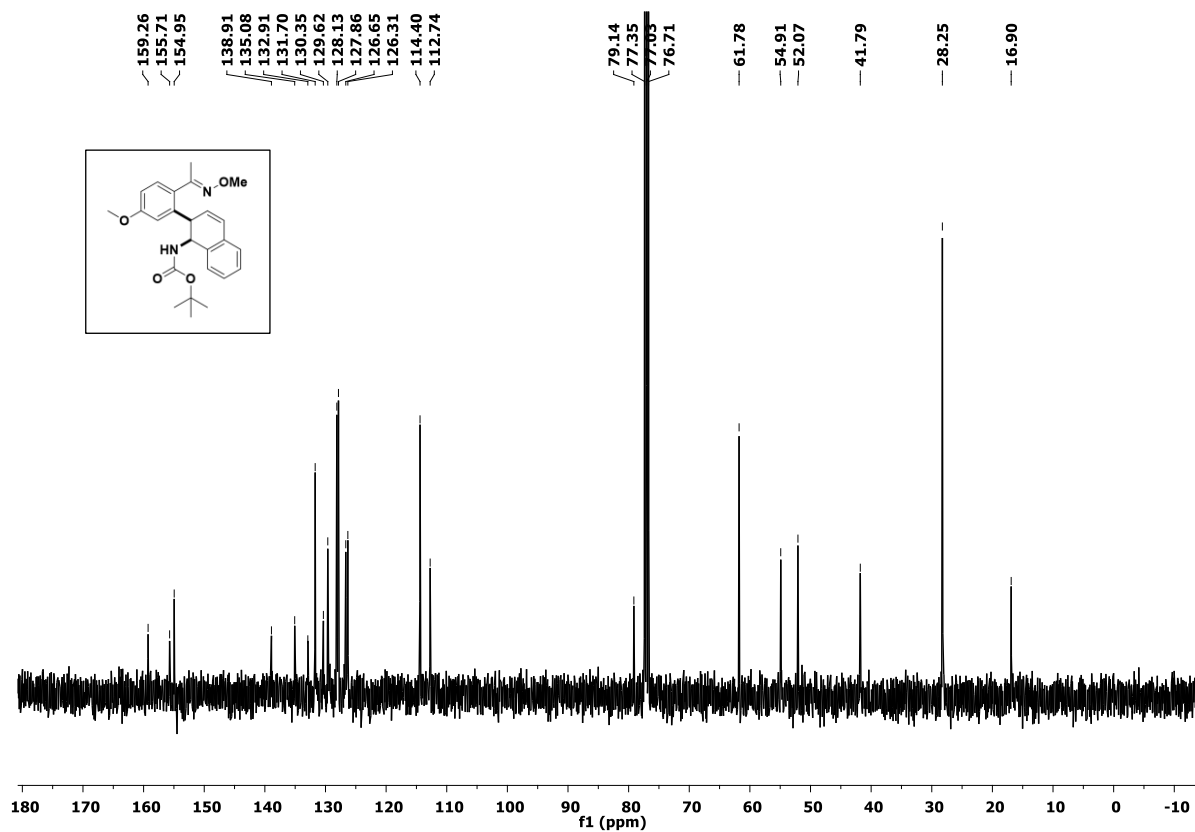



$^1\text{H}$  and  $^{13}\text{C}$  NMR Spectra of Compound **3ca**.

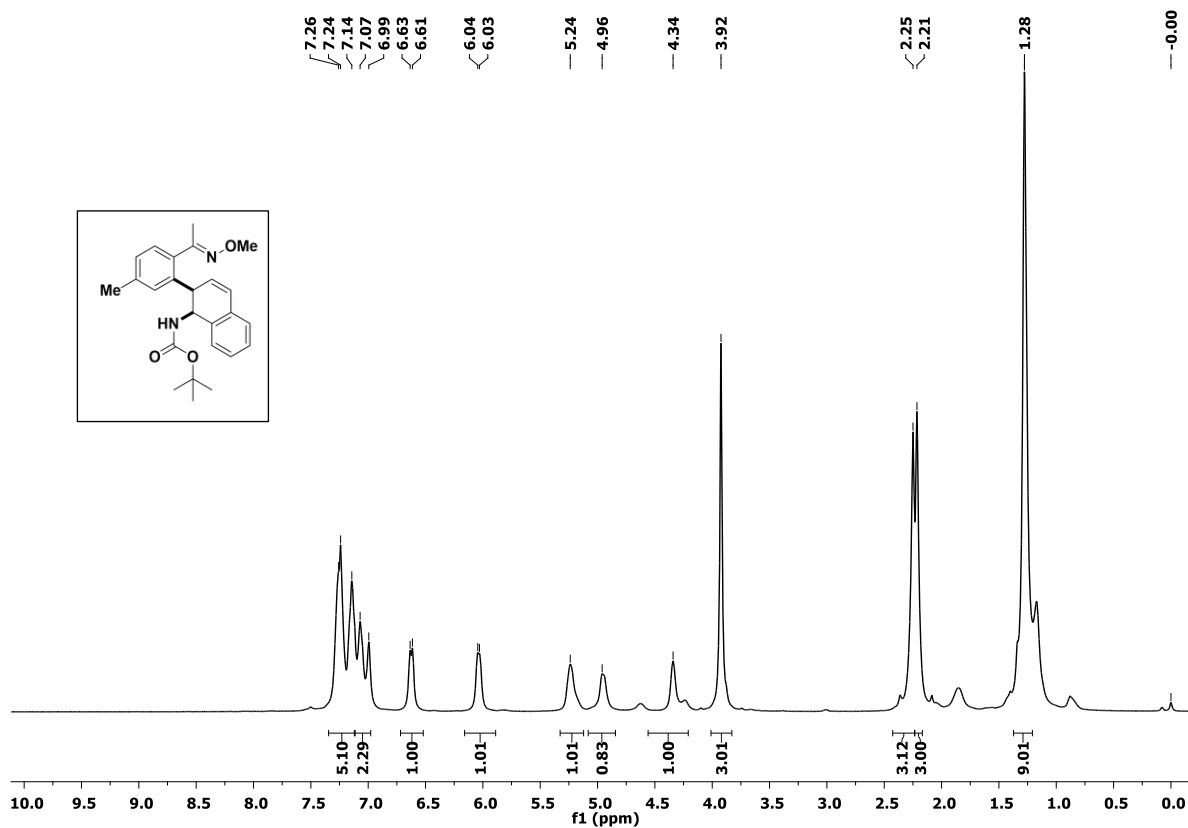

The NMR was taken at 50 °C. The bumps range 4.6 ppm and 4.2 ppm were disappeared

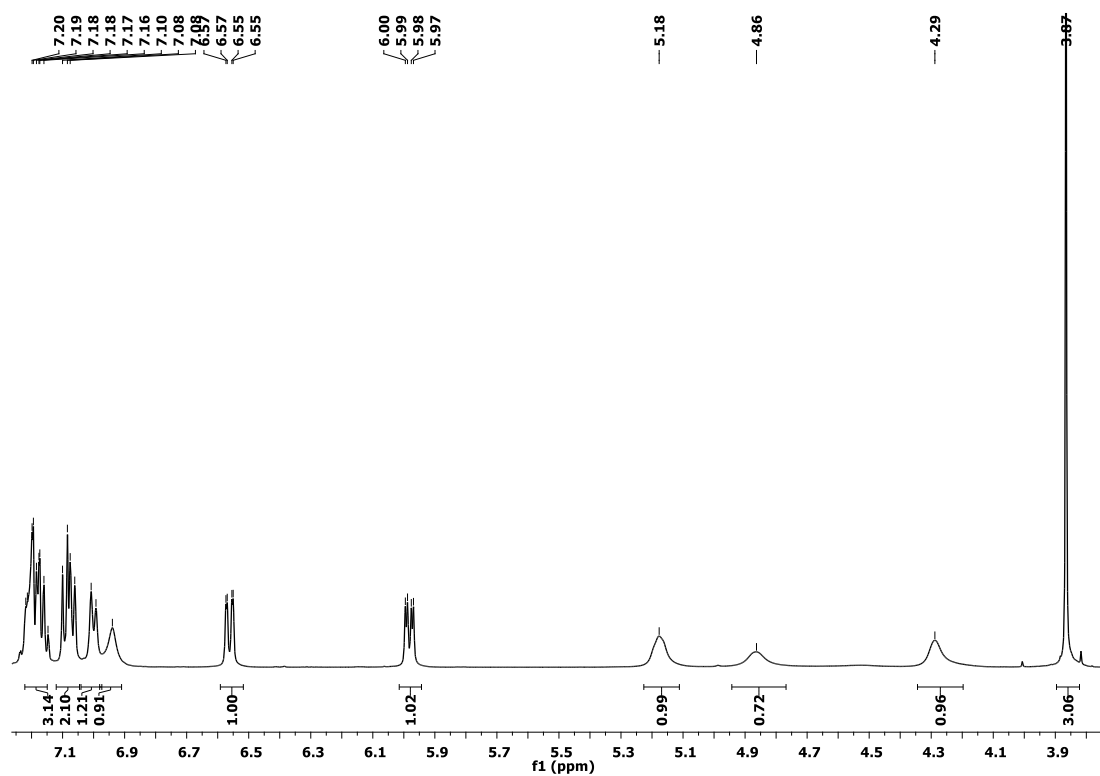



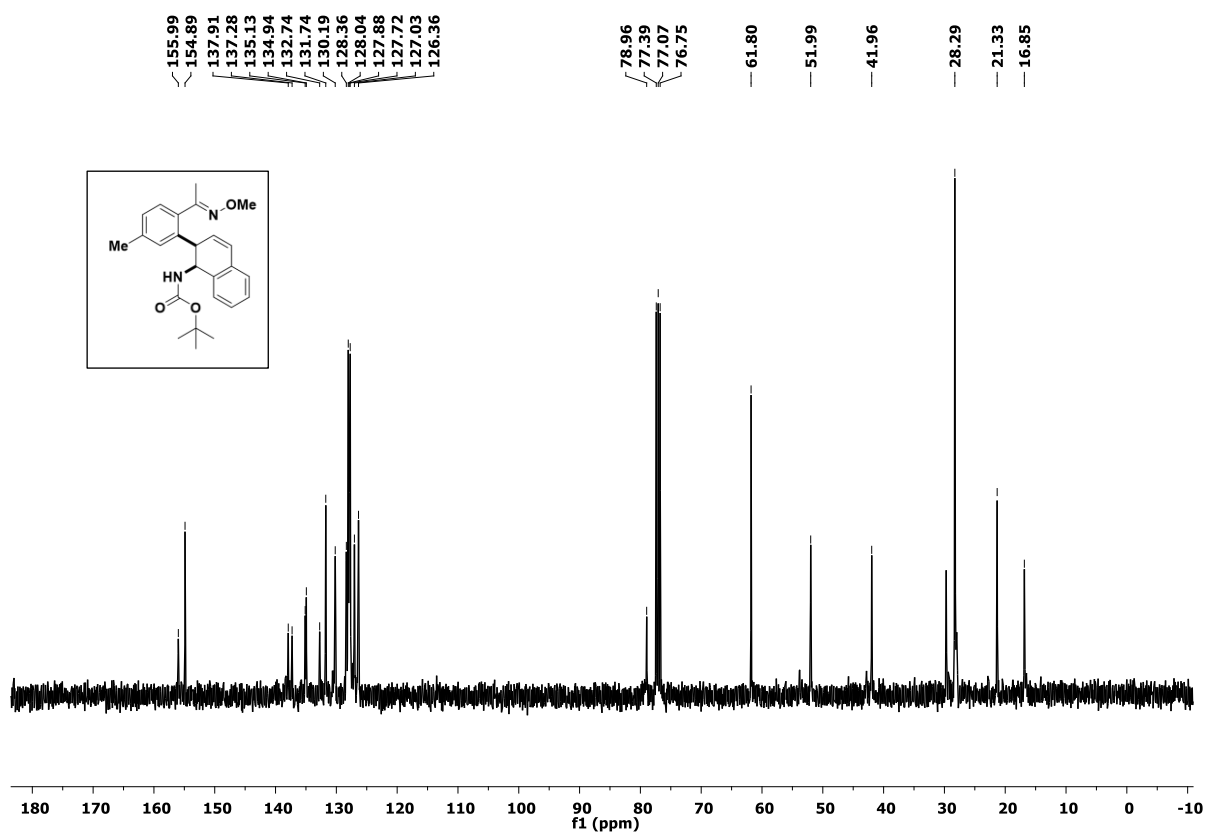



### <sup>1</sup>H and <sup>13</sup>C NMR Spectra of Compound **3da**.

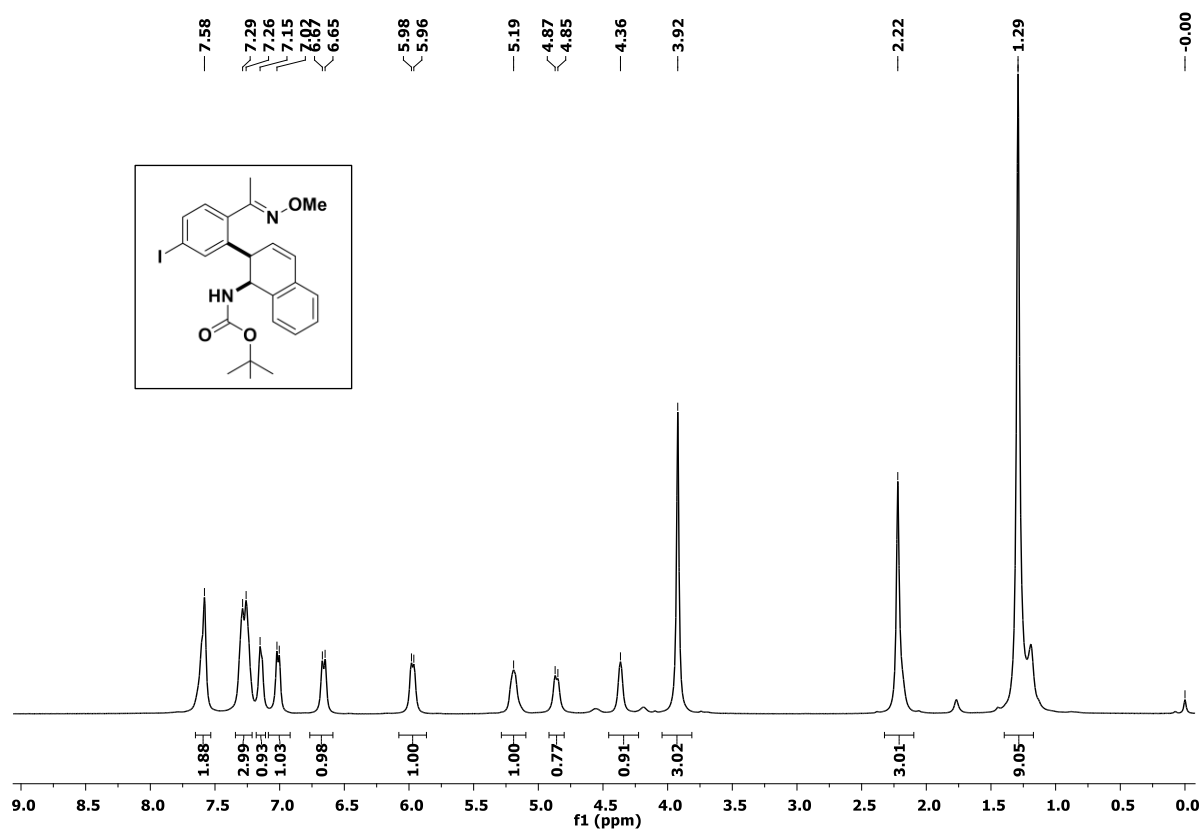

**Fine shimming NMR: expended Chemical shift 7.60 ppm to 3.8 ppm for better splitting**

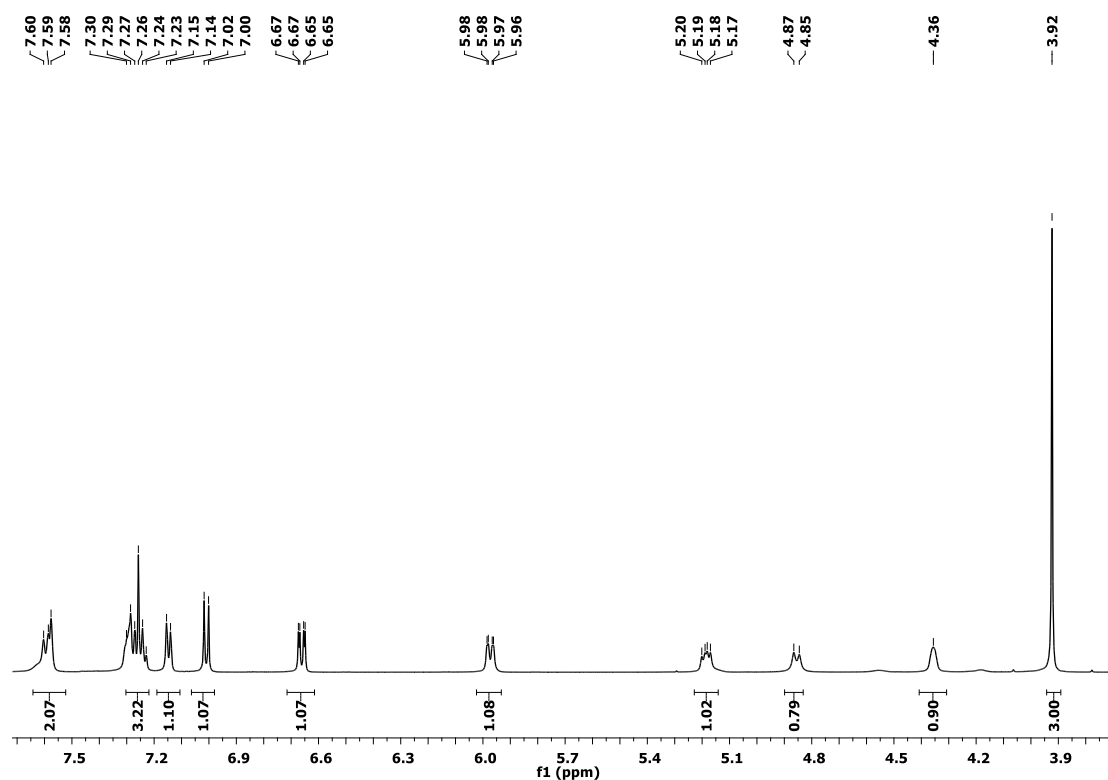



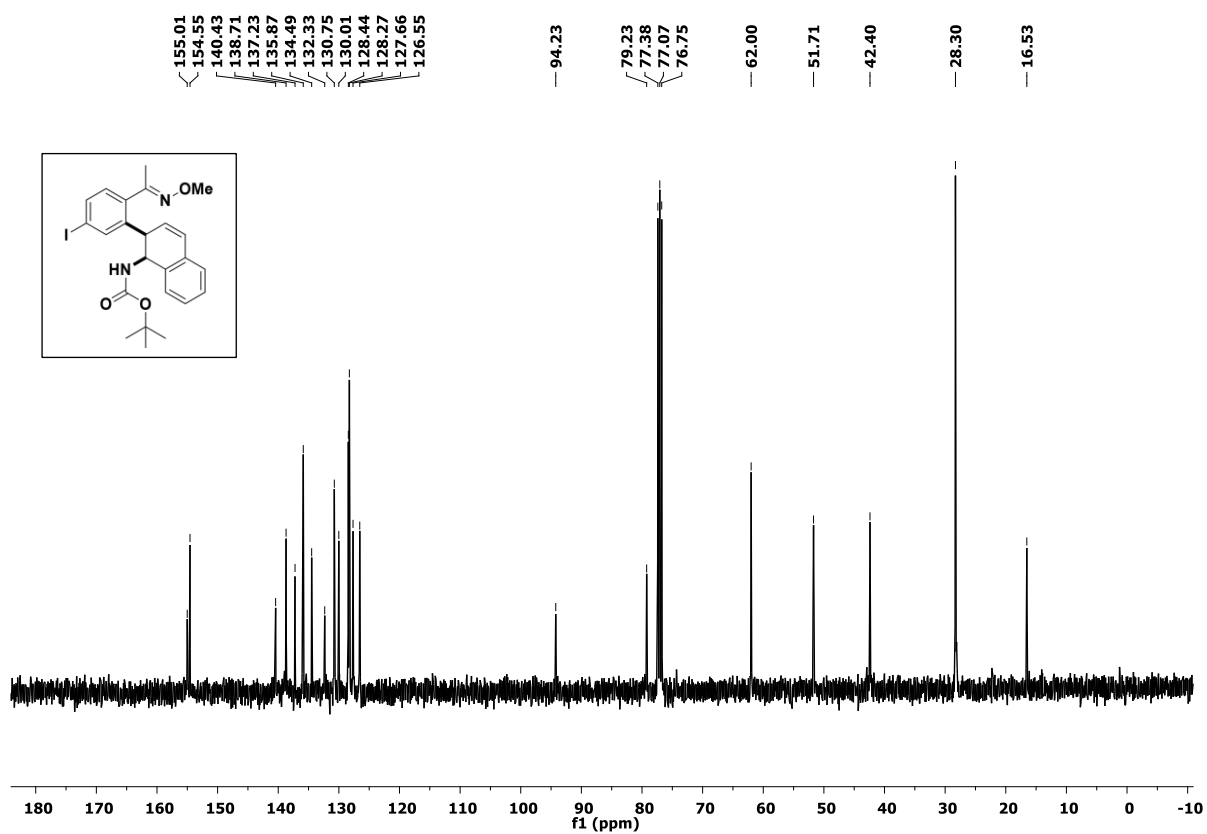



$^1\text{H}$  and  $^{13}\text{C}$  NMR Spectra of Compound **3ea**.

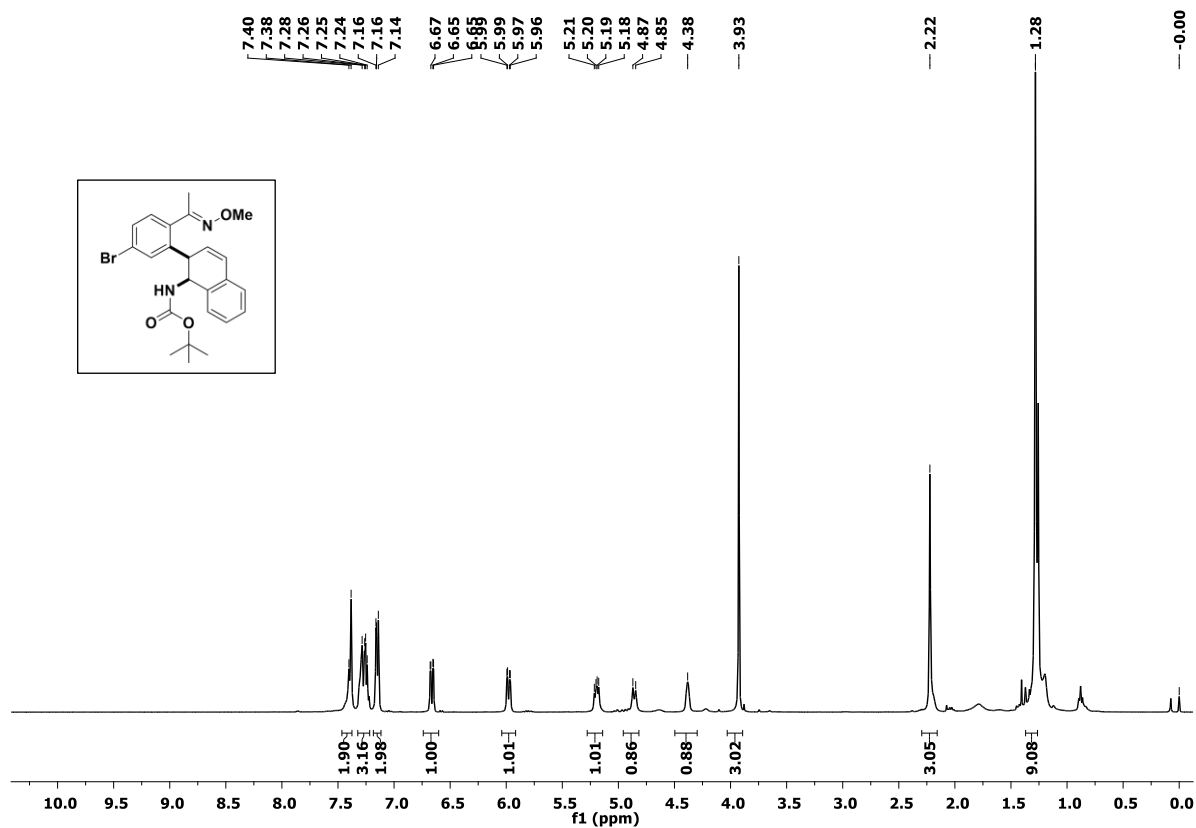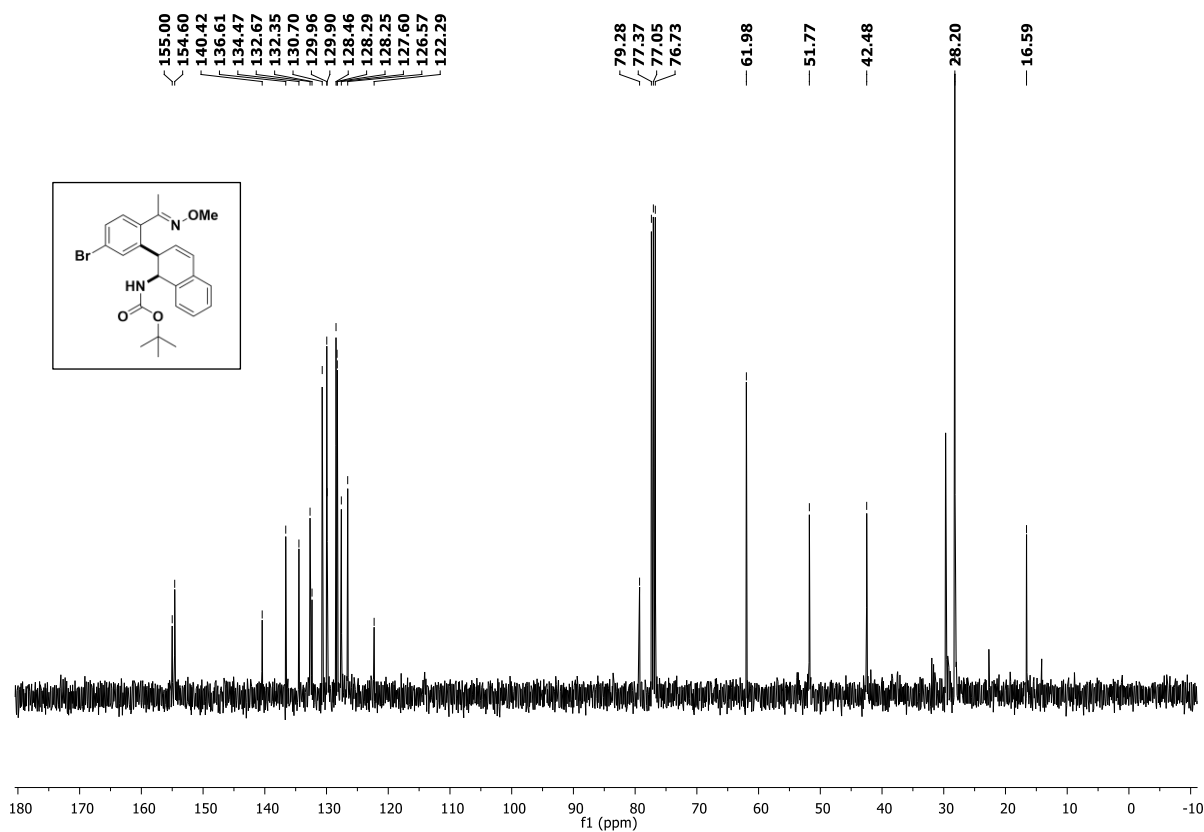



$^1\text{H}$  and  $^{13}\text{C}$  NMR Spectra of Compound **3fa**.

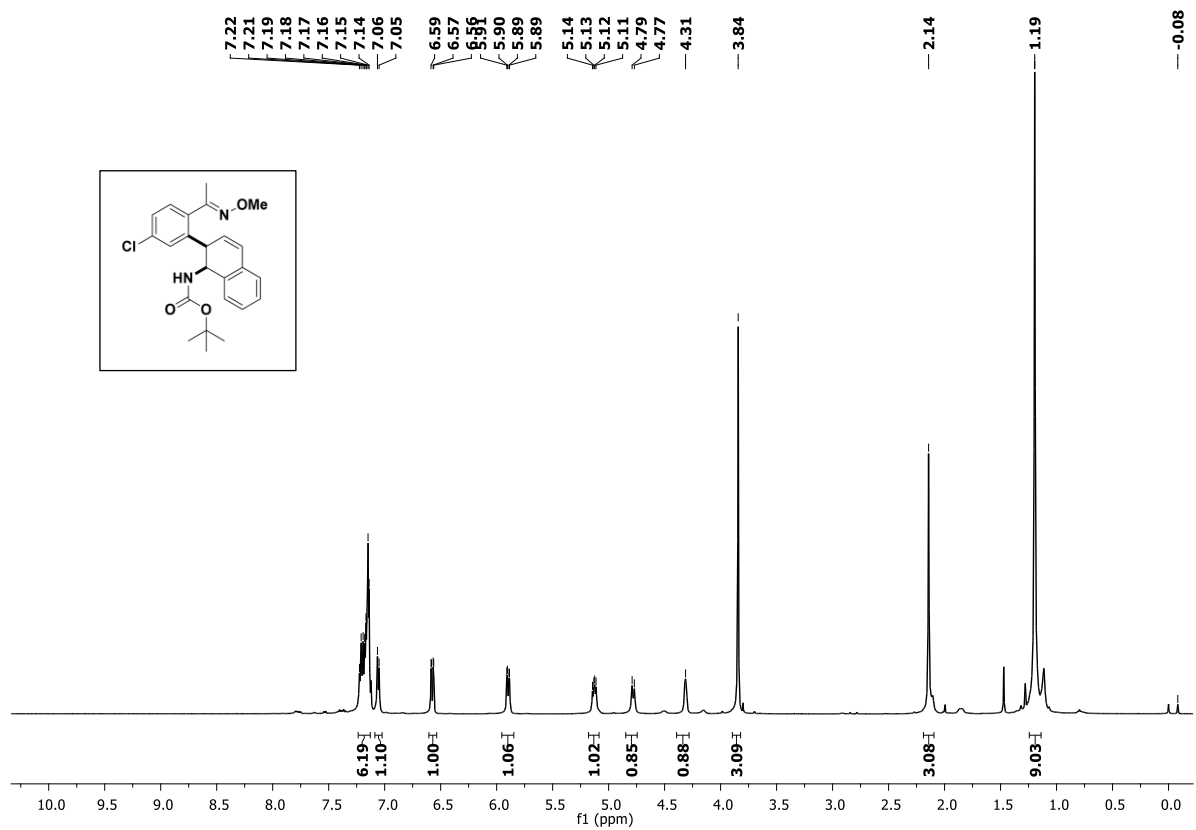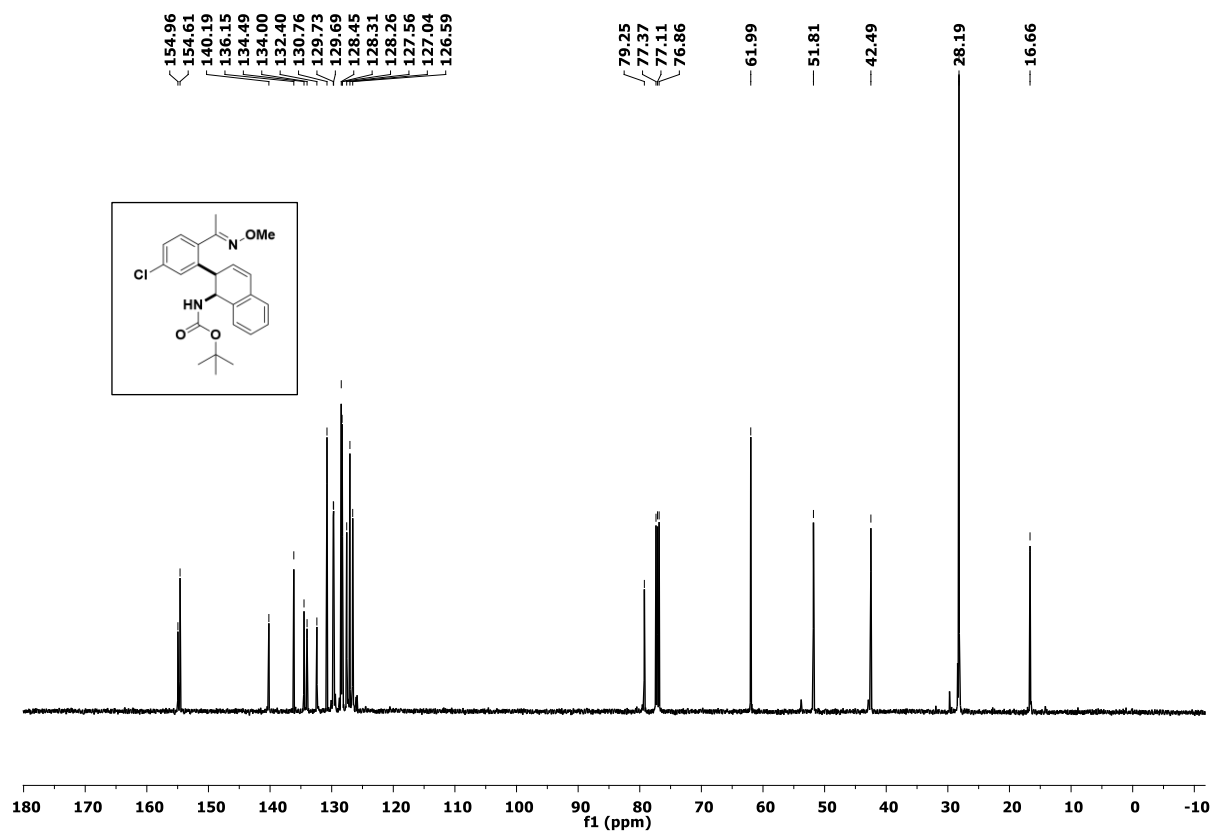



# <sup>1</sup>H and <sup>13</sup>C NMR Spectra of Compound **3ga**.

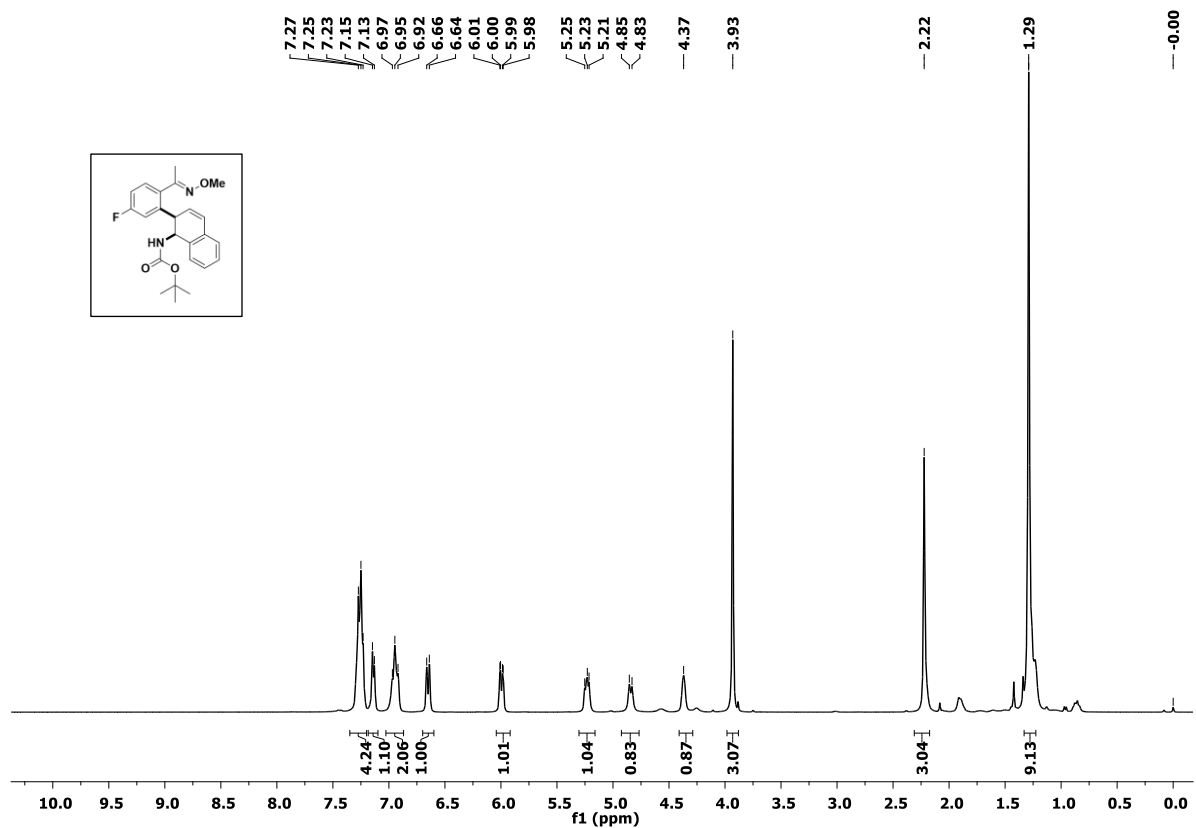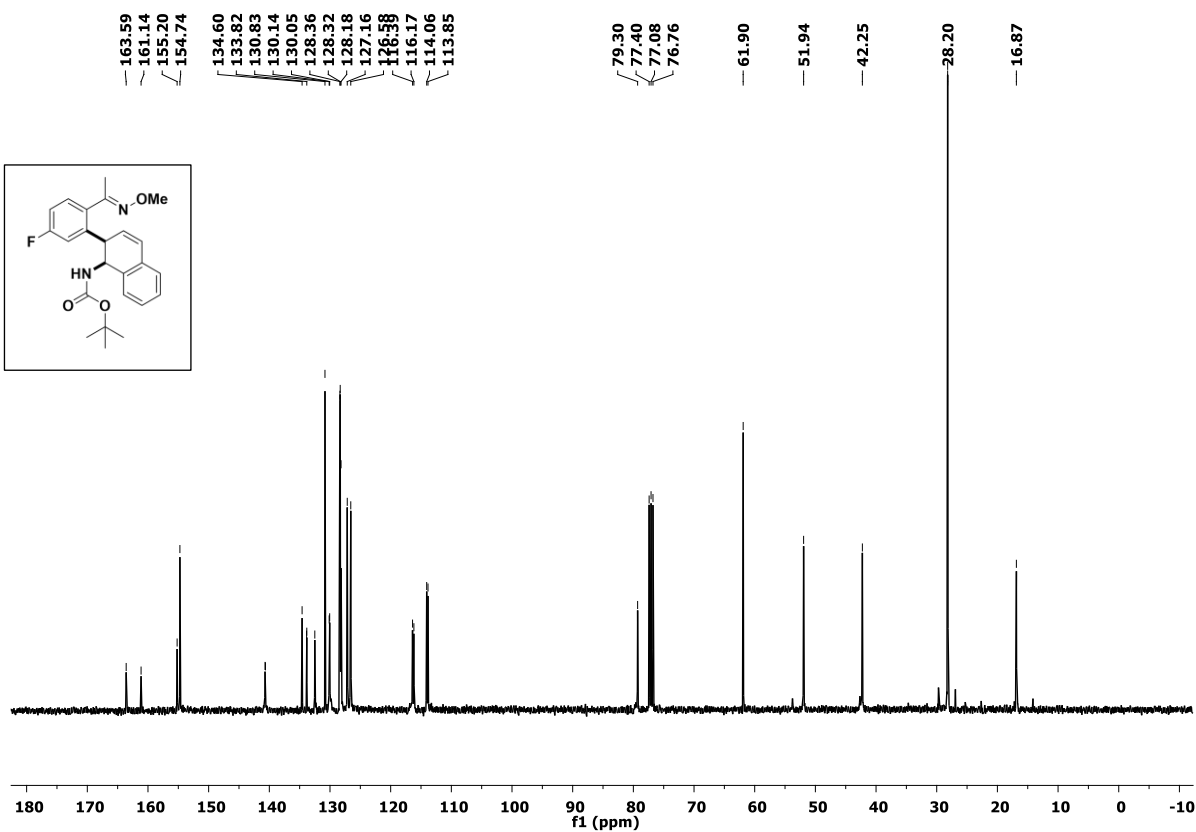



$^1\text{H}$  and  $^{13}\text{C}$  NMR Spectra of Compound **3ha**.

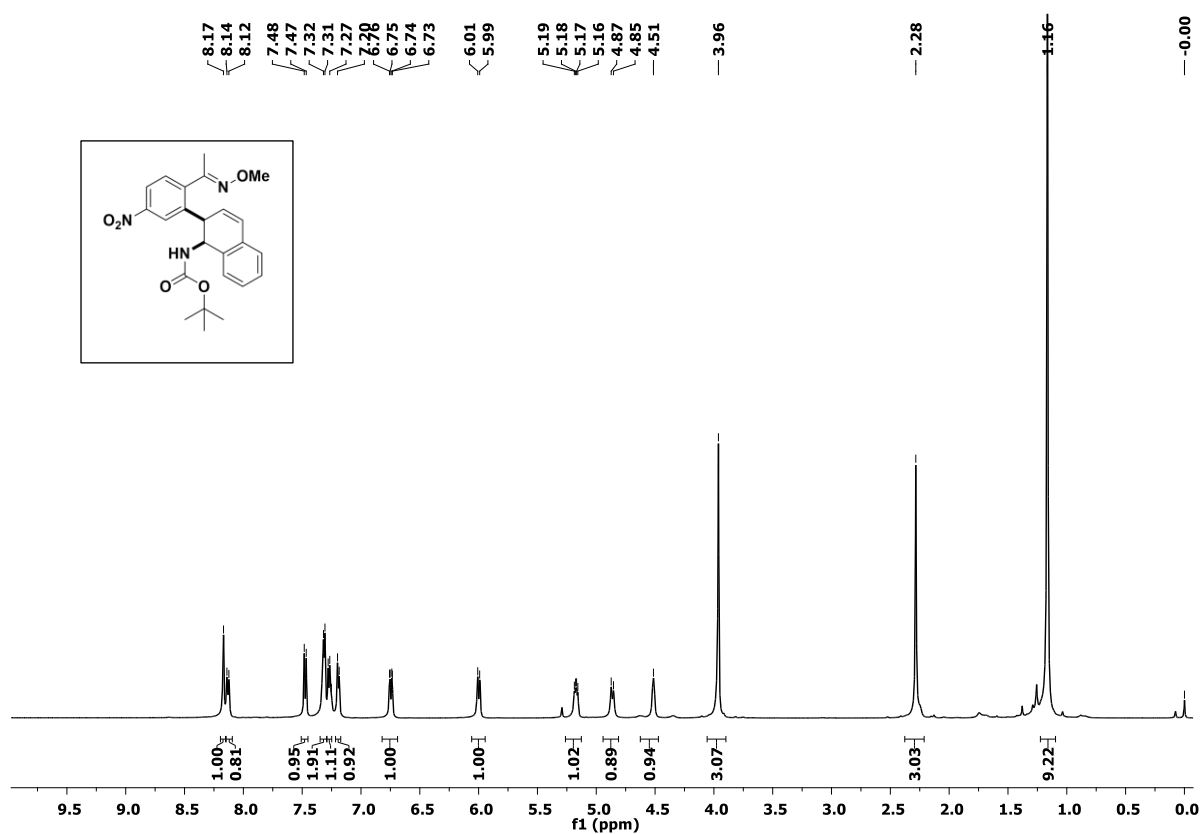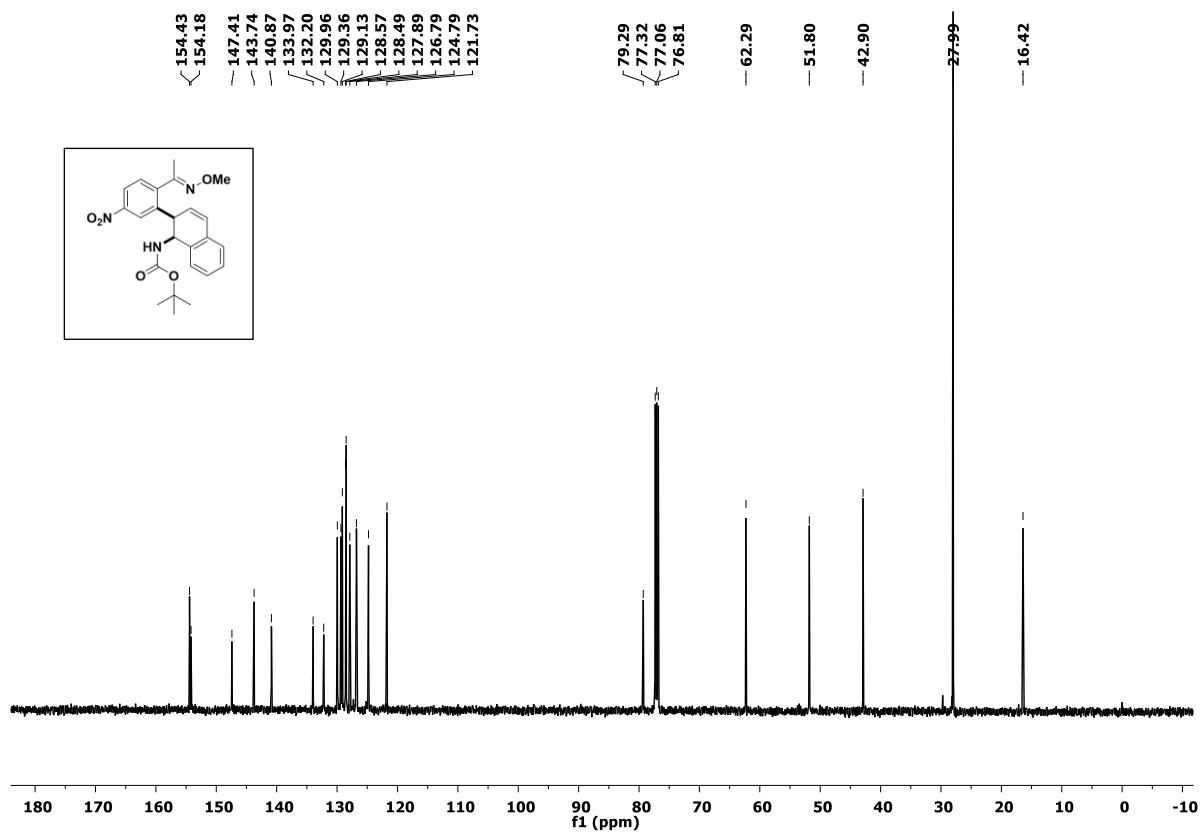



$^1\text{H}$  and  $^{13}\text{C}$  NMR Spectra of Compound **3ia**.

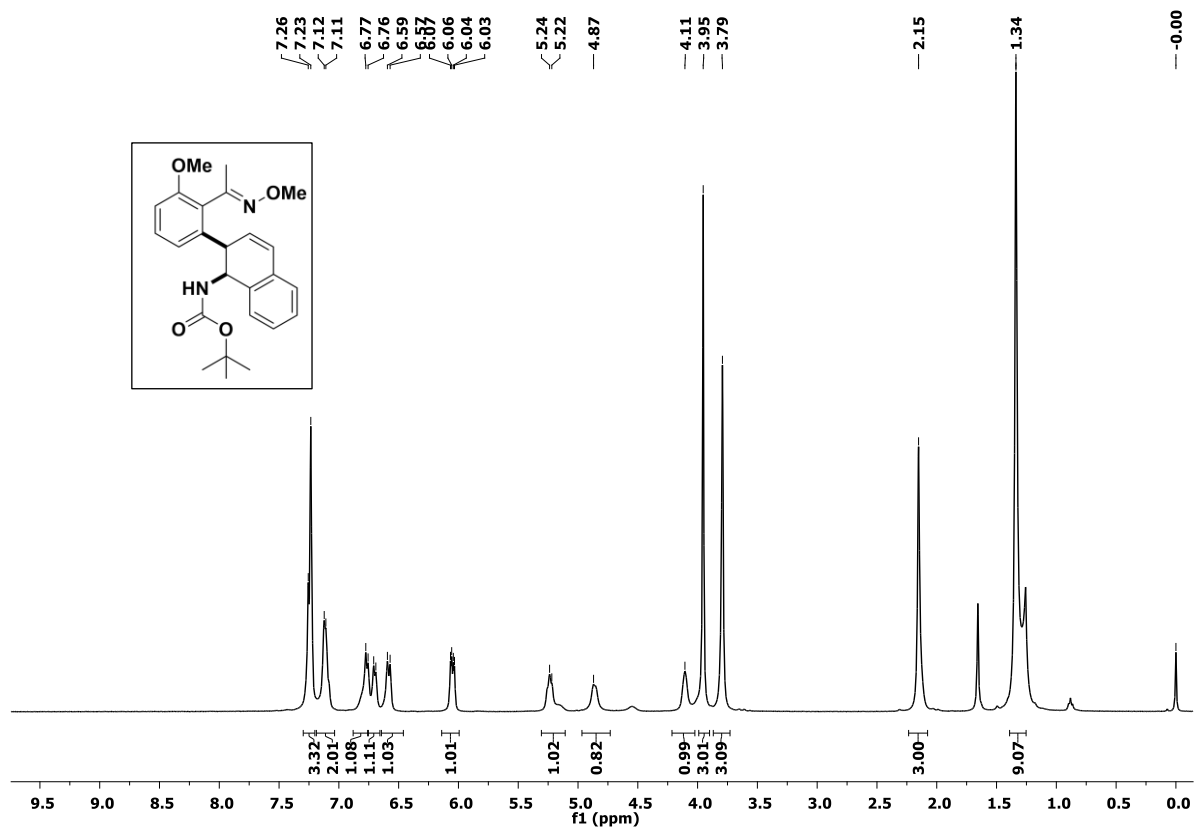

The NMR was taken at 50 °C. The bumps range 5.2 ppm and 4.5 ppm were disappeared

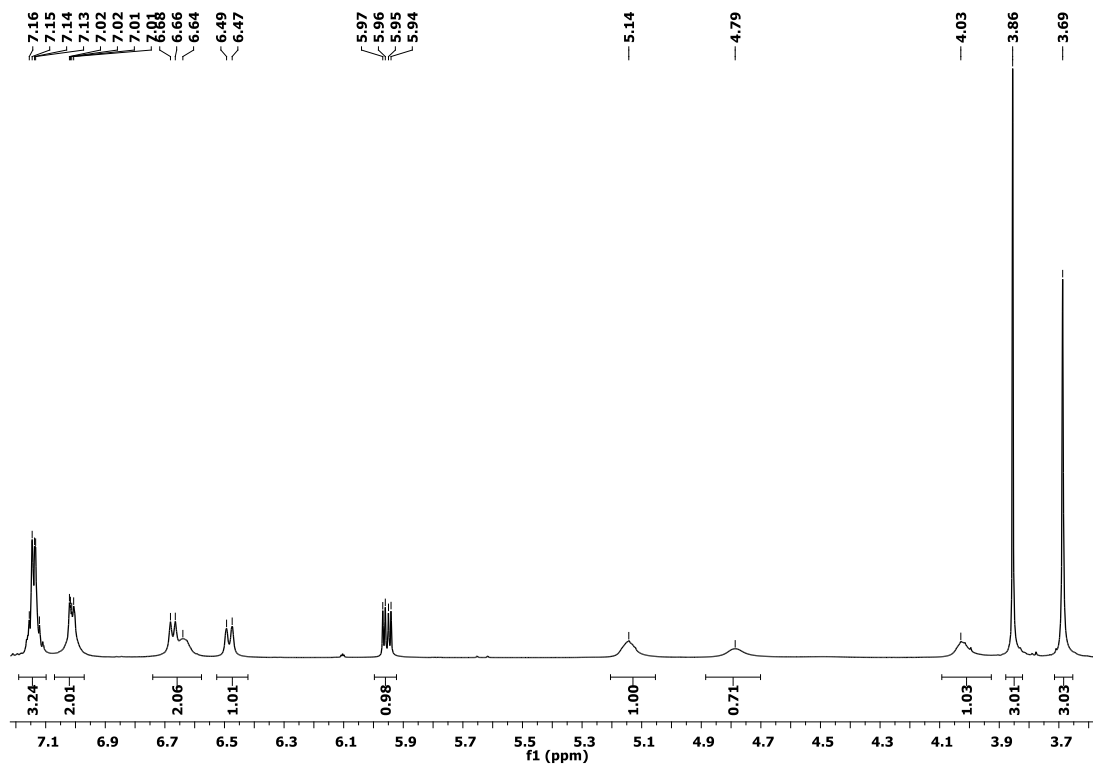



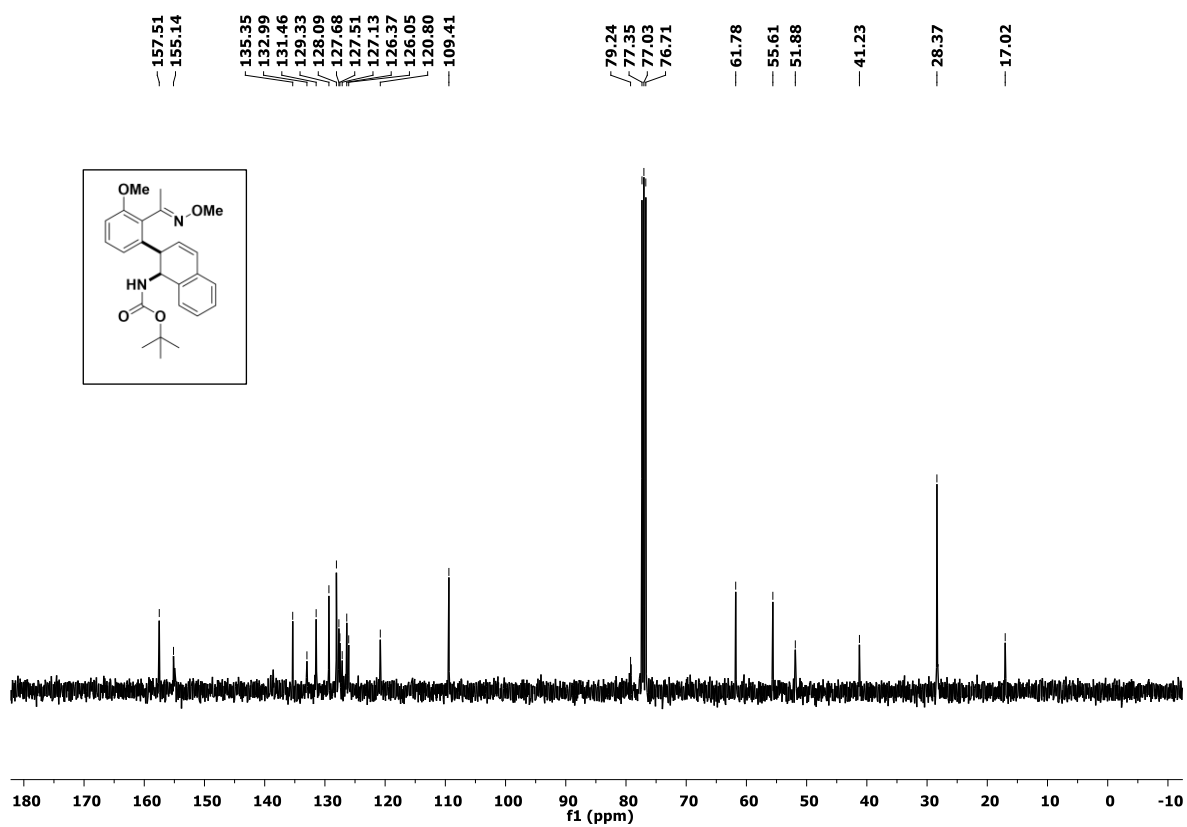



$^1\text{H}$  and  $^{13}\text{C}$  NMR Spectra of Compound **3ja**.

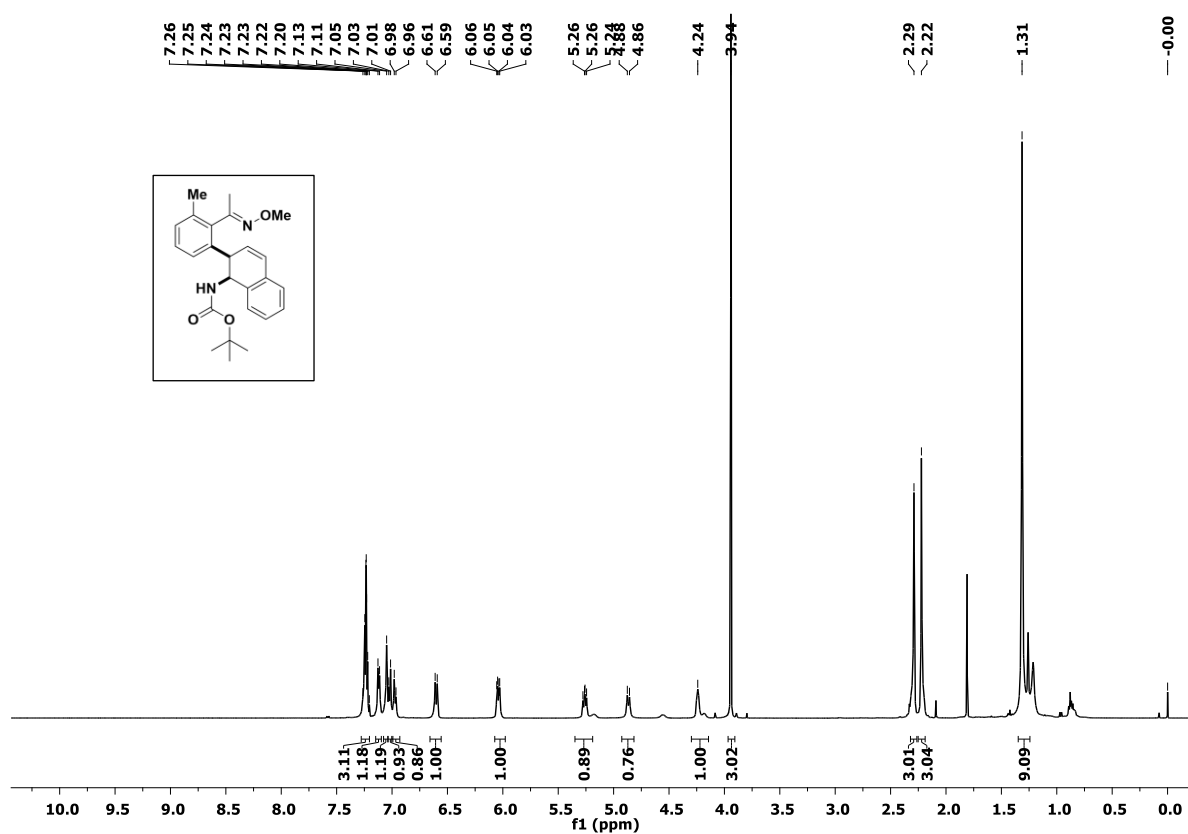

**Fine shimming NMR: expended Chemical shift 7.30 ppm to 3.9 ppm for better splitting**

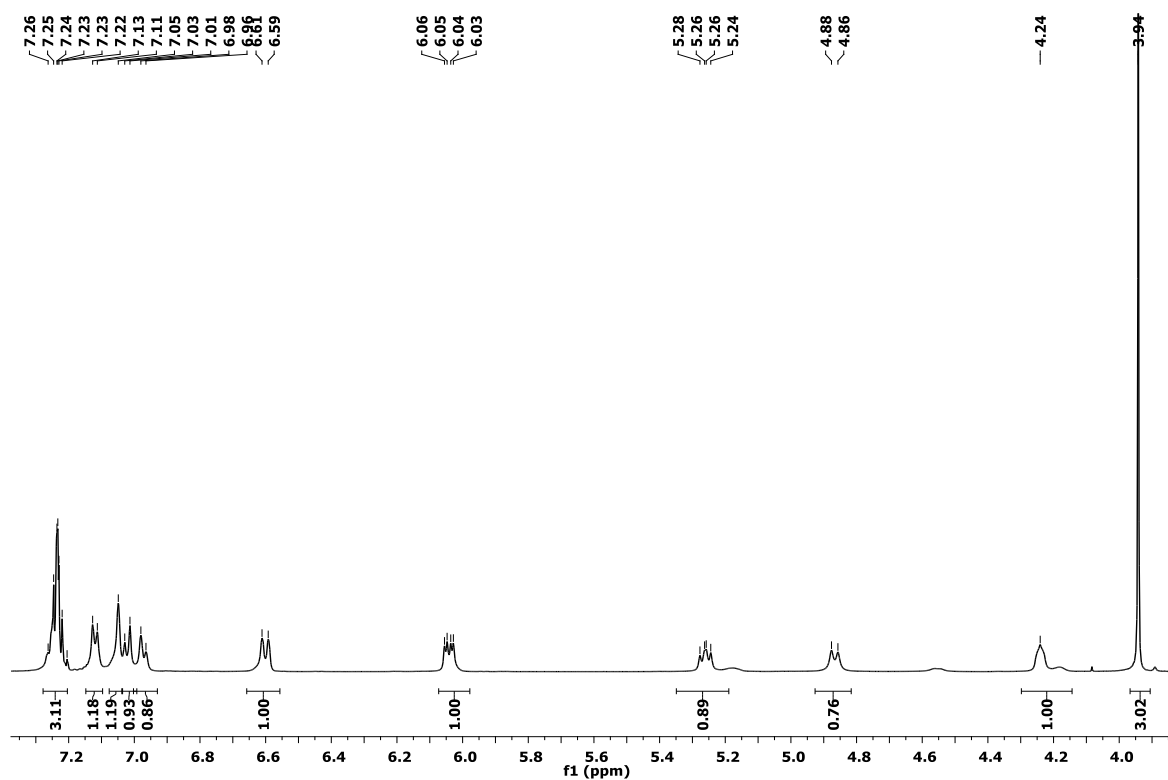



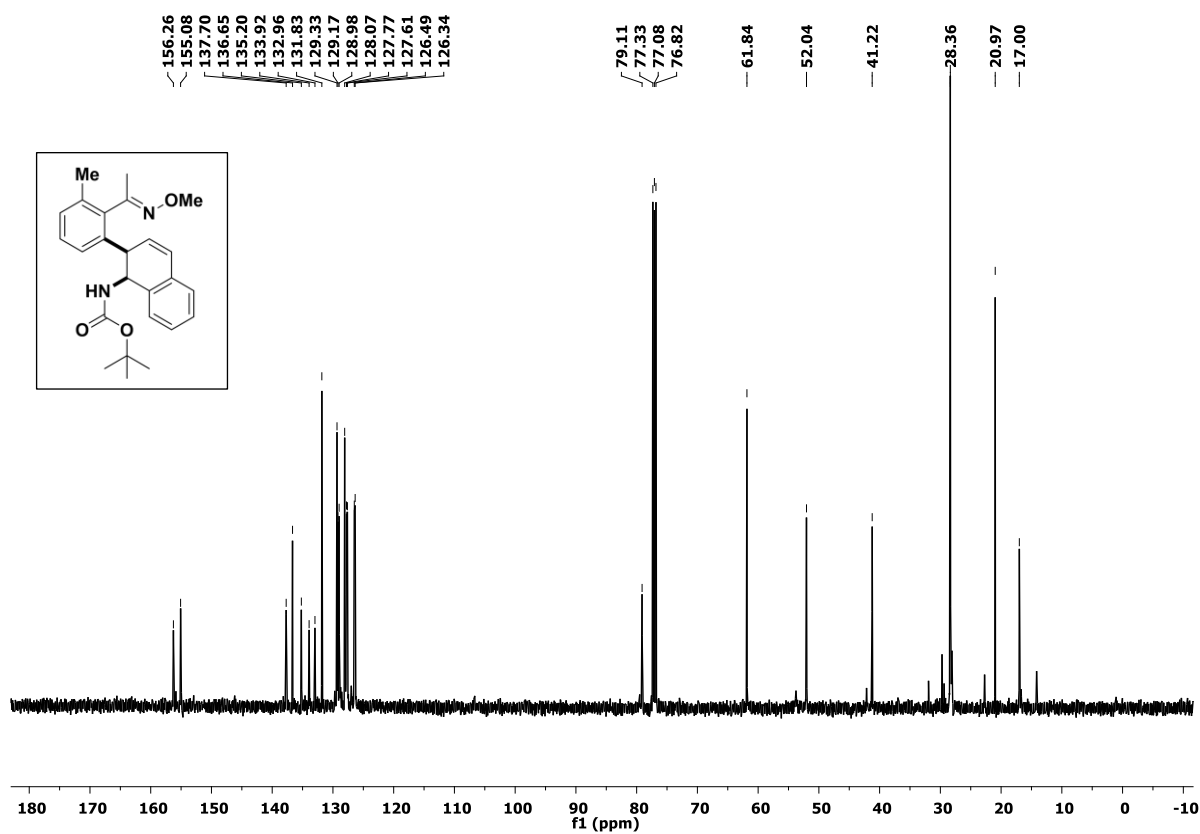



$^1\text{H}$  and  $^{13}\text{C}$  NMR Spectra of Compound **3ka**.

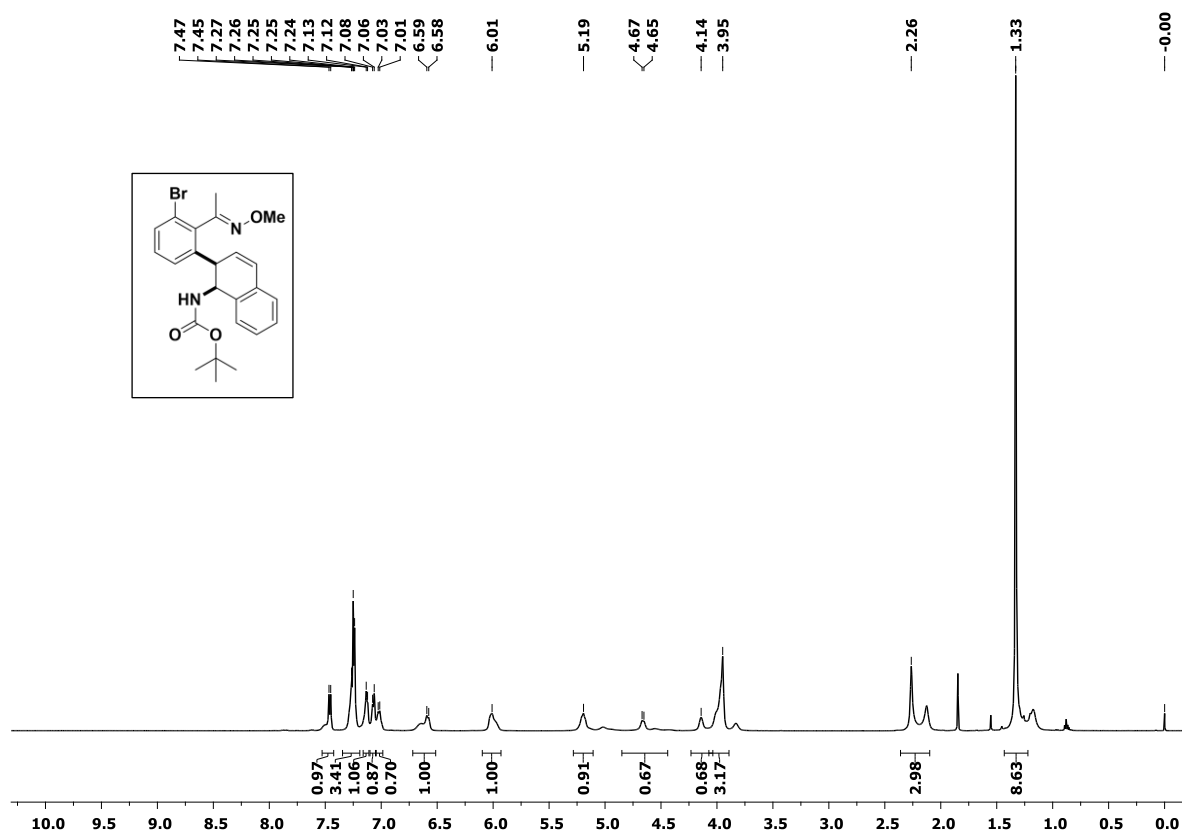

Fine shimming NMR expended: Chemical shift 7.60 ppm to 3.8 ppm for better splitting

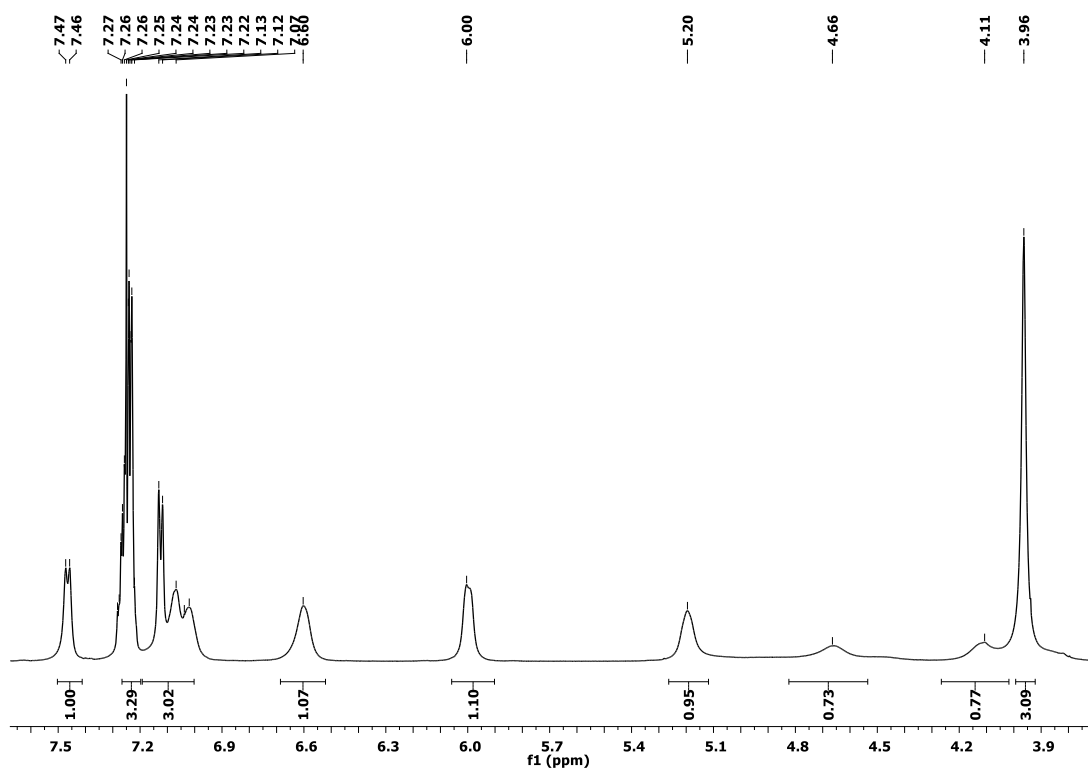



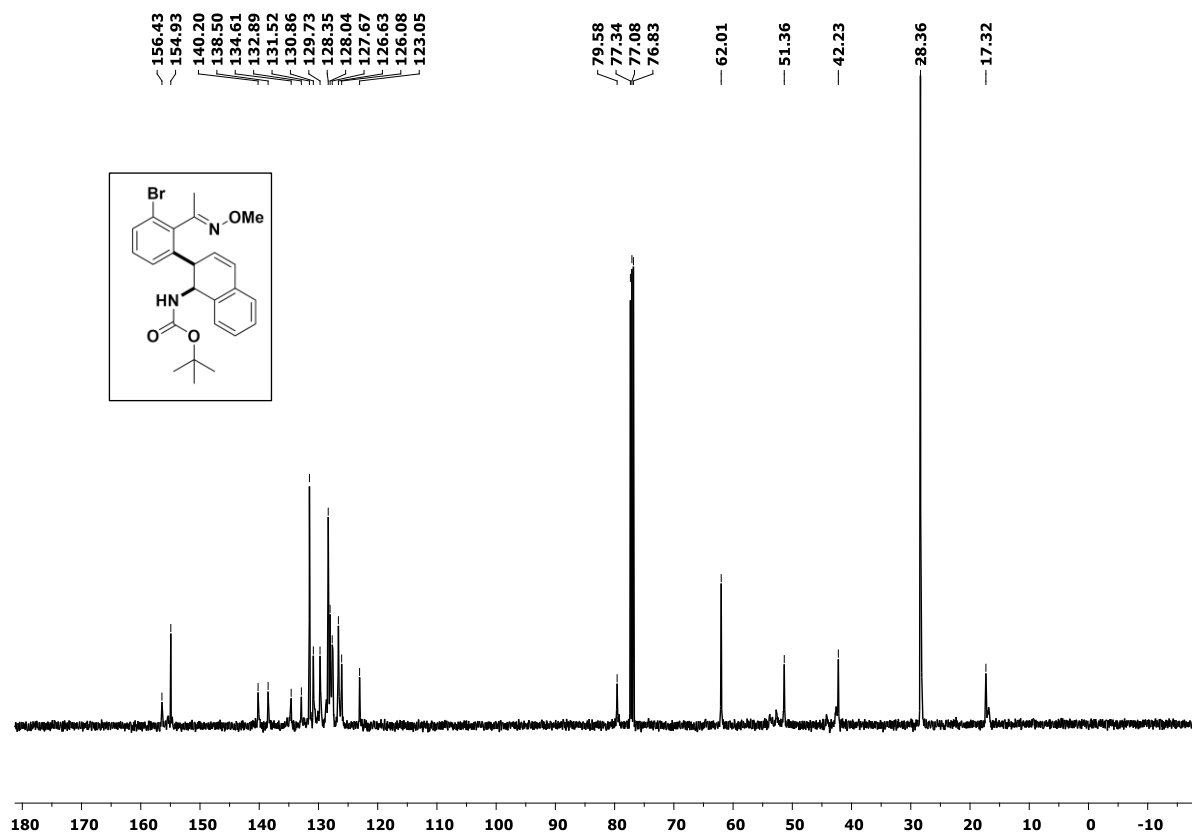



$^1\text{H}$  and  $^{13}\text{C}$  NMR Spectra of Compound **3la**.

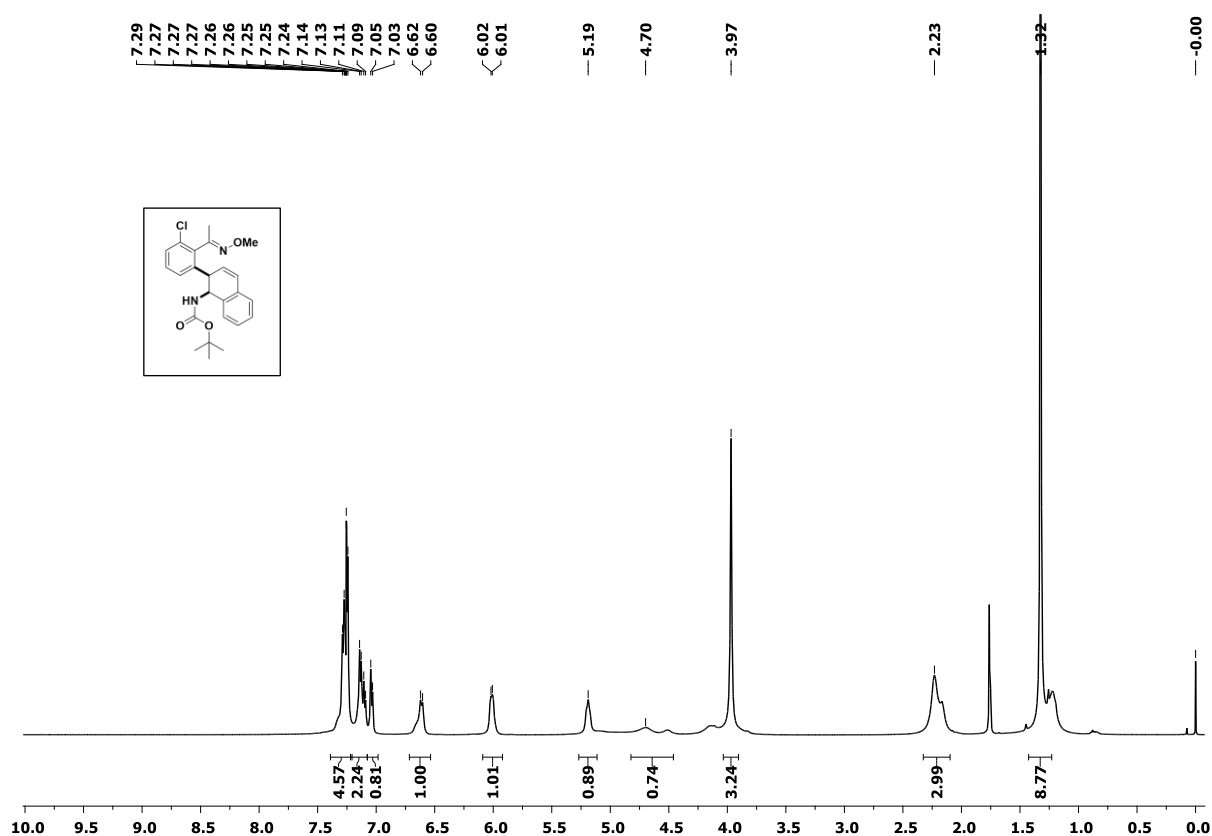

**Fine shimming NMR expended: Chemical shift 7.30 ppm to 3.9 ppm for better splitting**

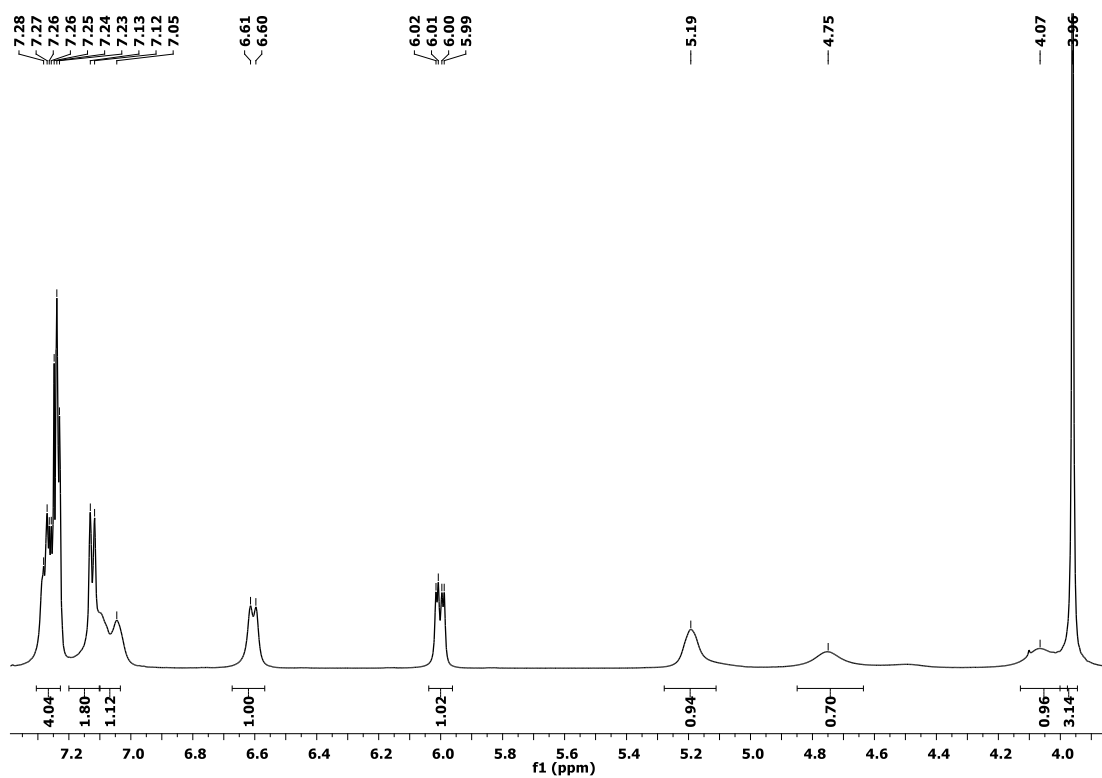



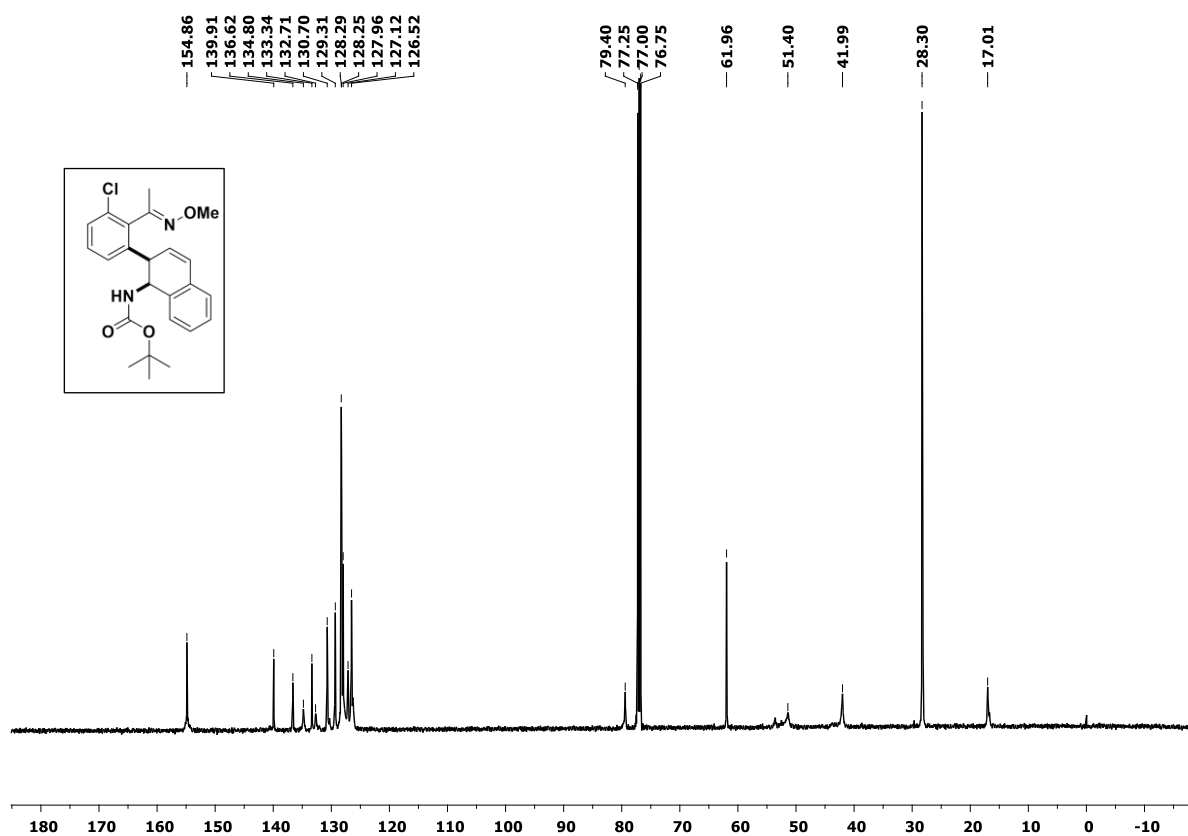



$^1\text{H}$  and  $^{13}\text{C}$  NMR Spectra of Compound **3ma**.

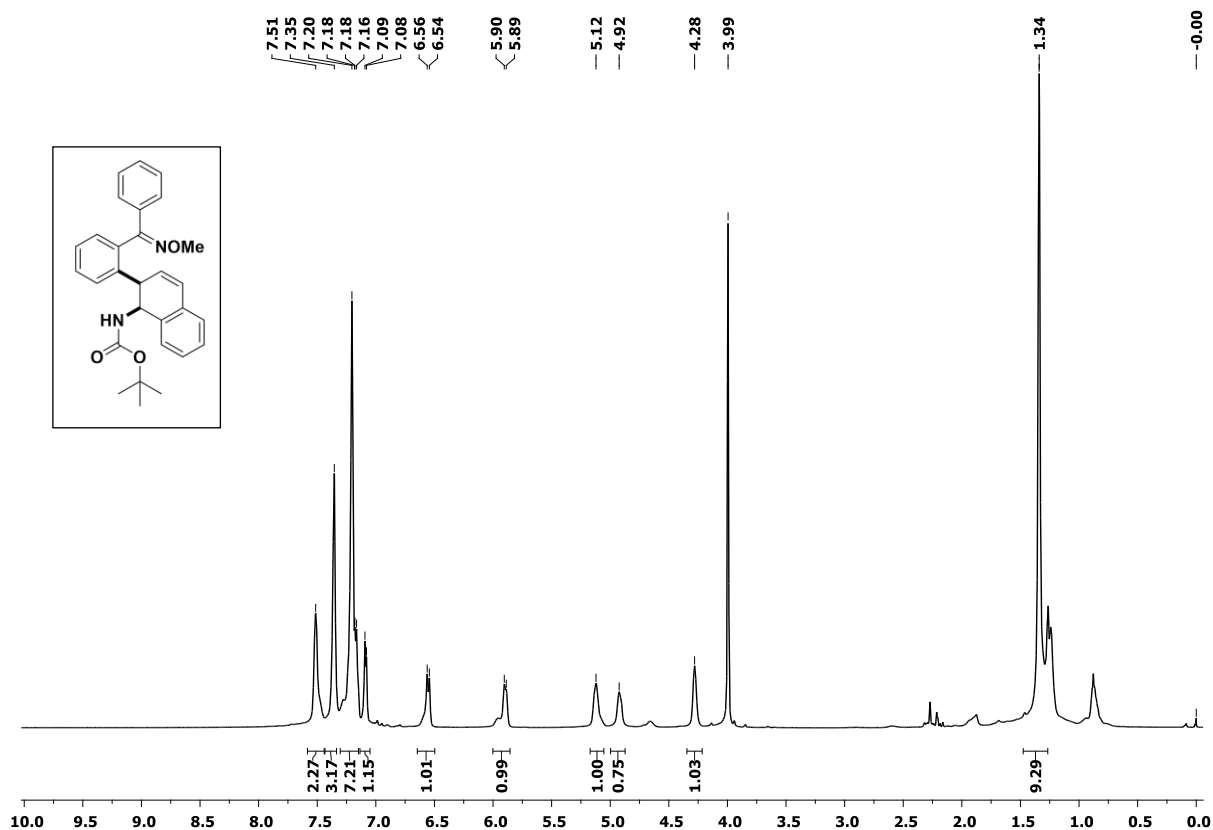

The NMR was taken at 50 °C. The bumps range 5.9 ppm and 4.6 ppm were disappeared

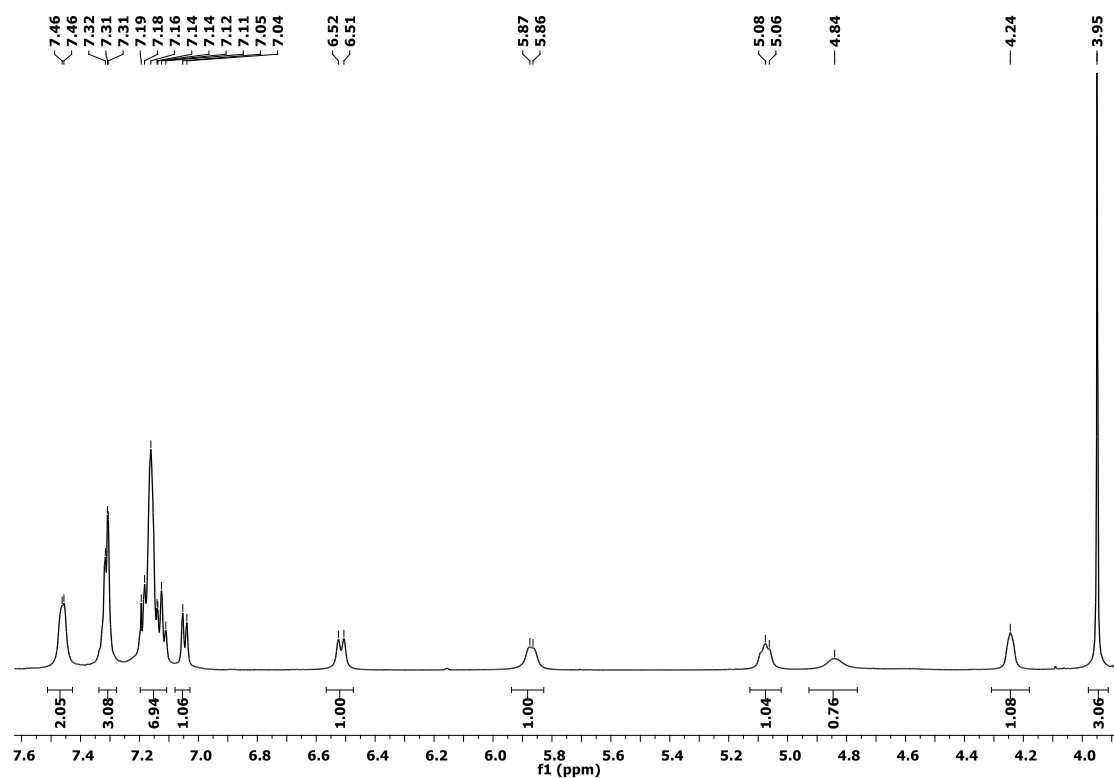



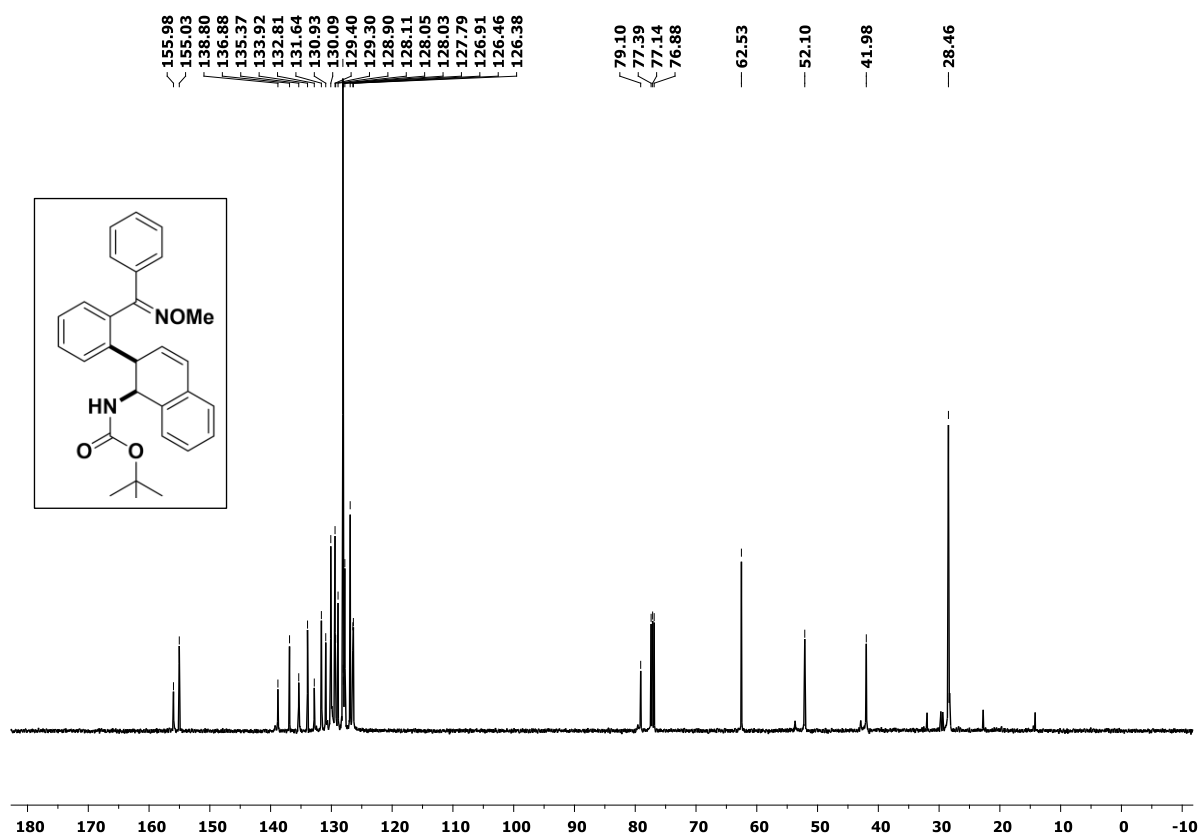



$^1\text{H}$  and  $^{13}\text{C}$  NMR Spectra of Compound **3na**.

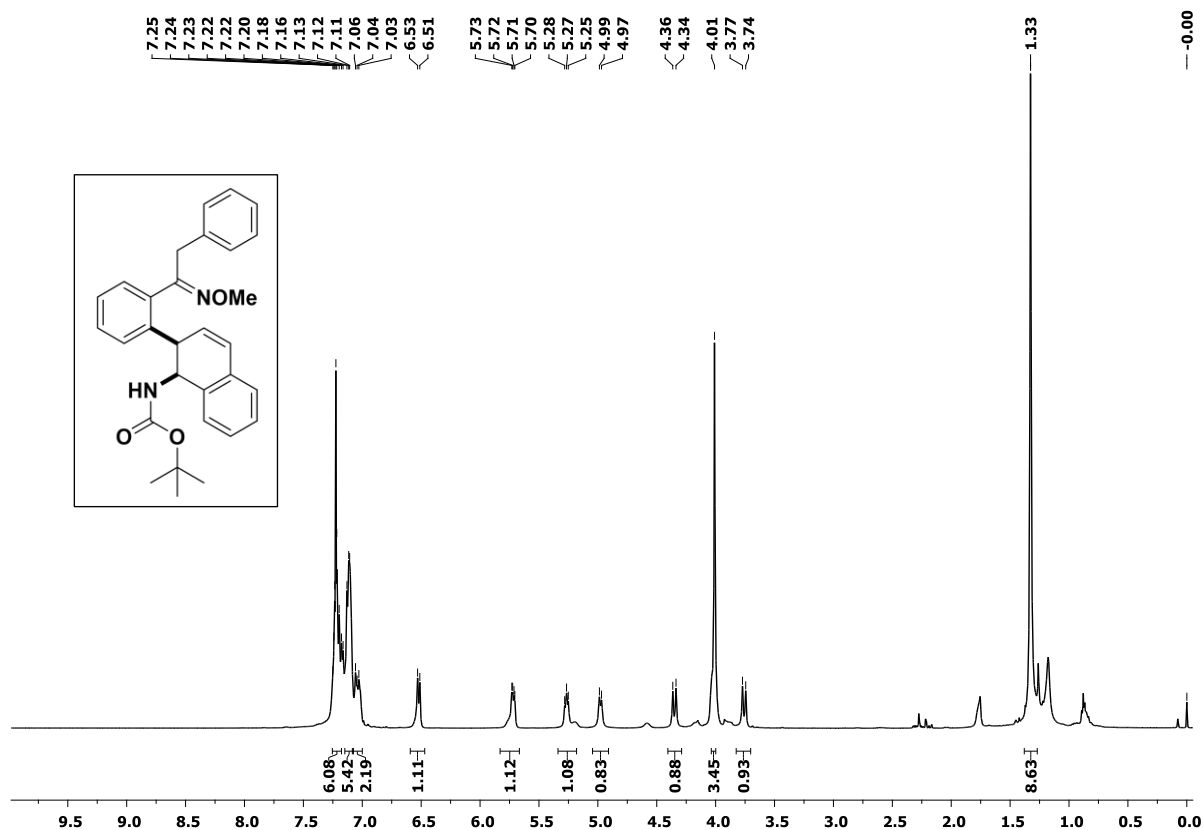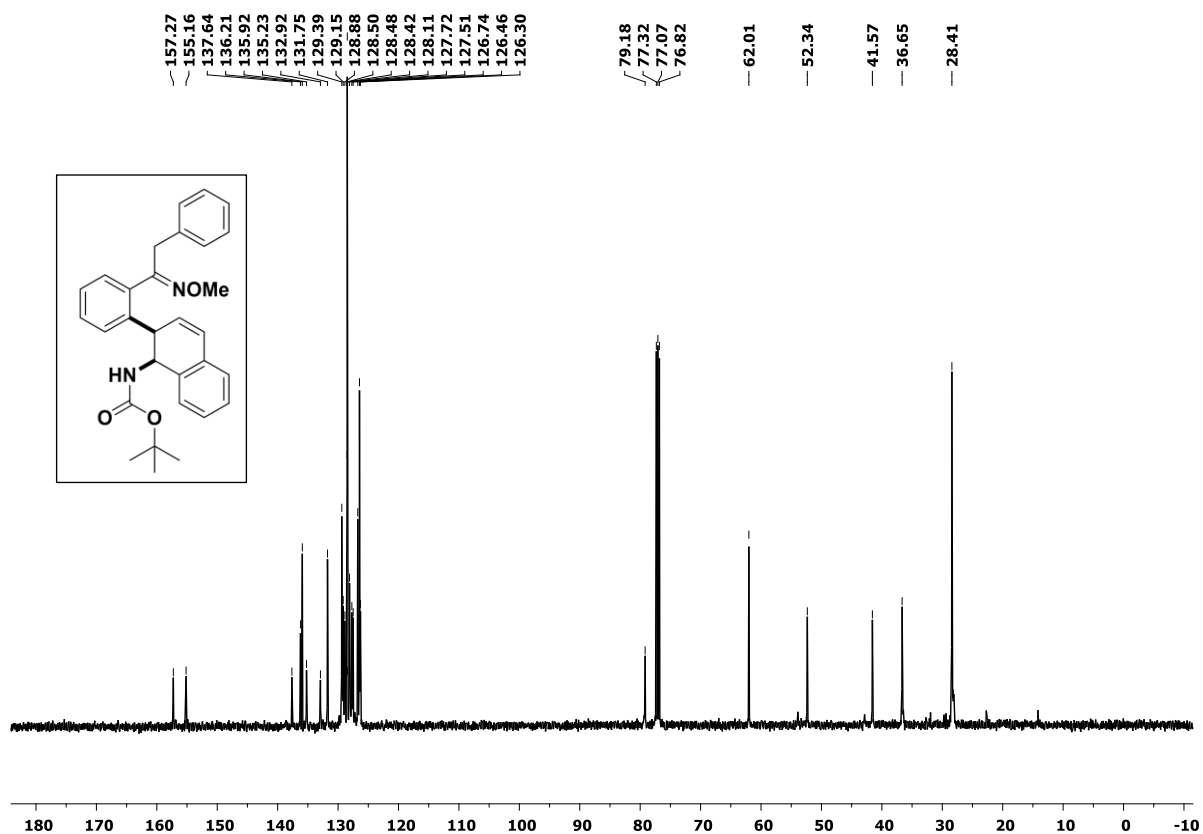



$^1\text{H}$  and  $^{13}\text{C}$  NMR Spectra of Compound **30a**.

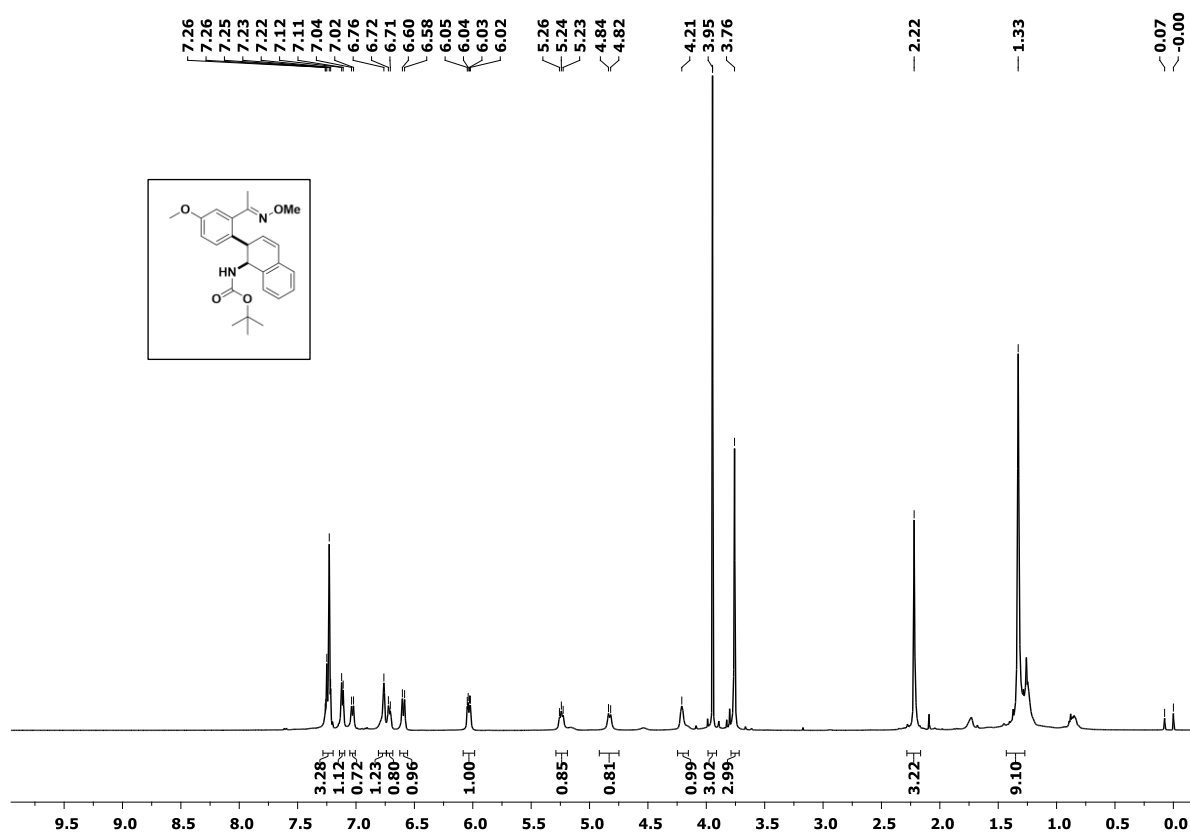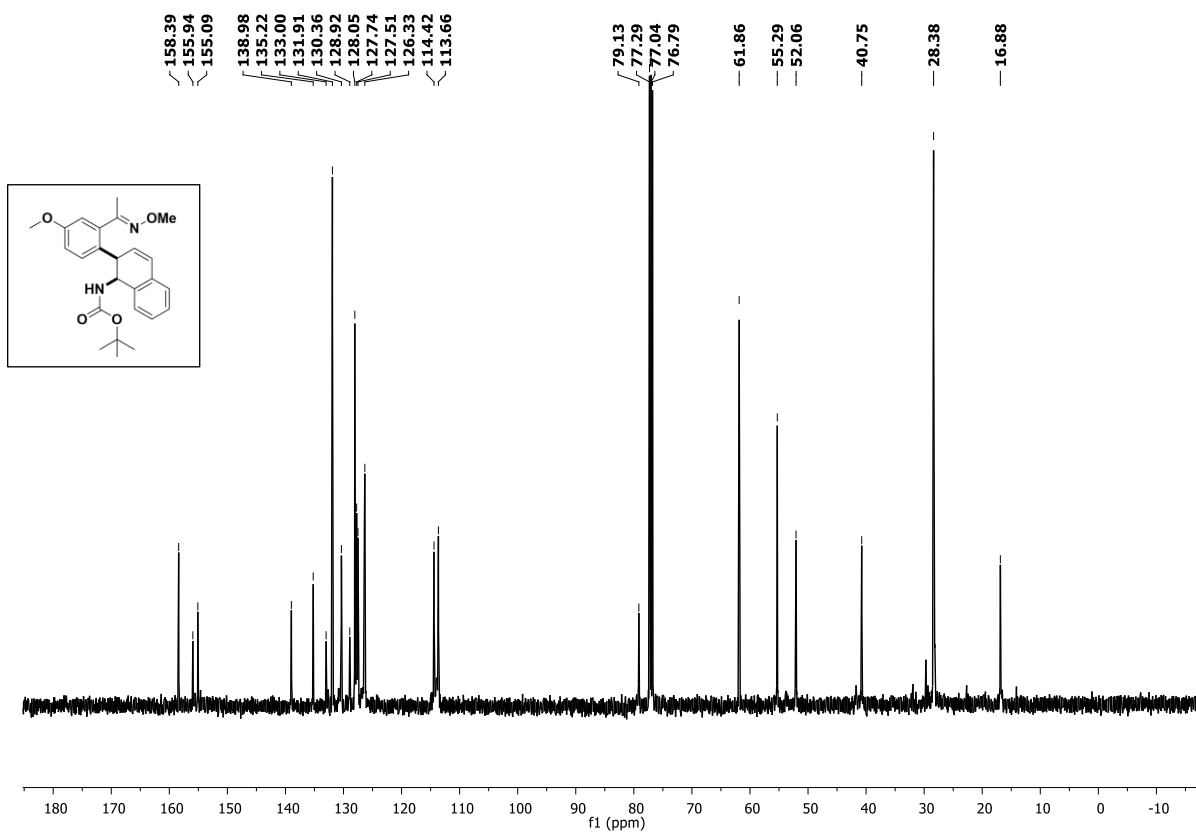



# DEPT (135) NMR Spectrum of Compound **3oa**.

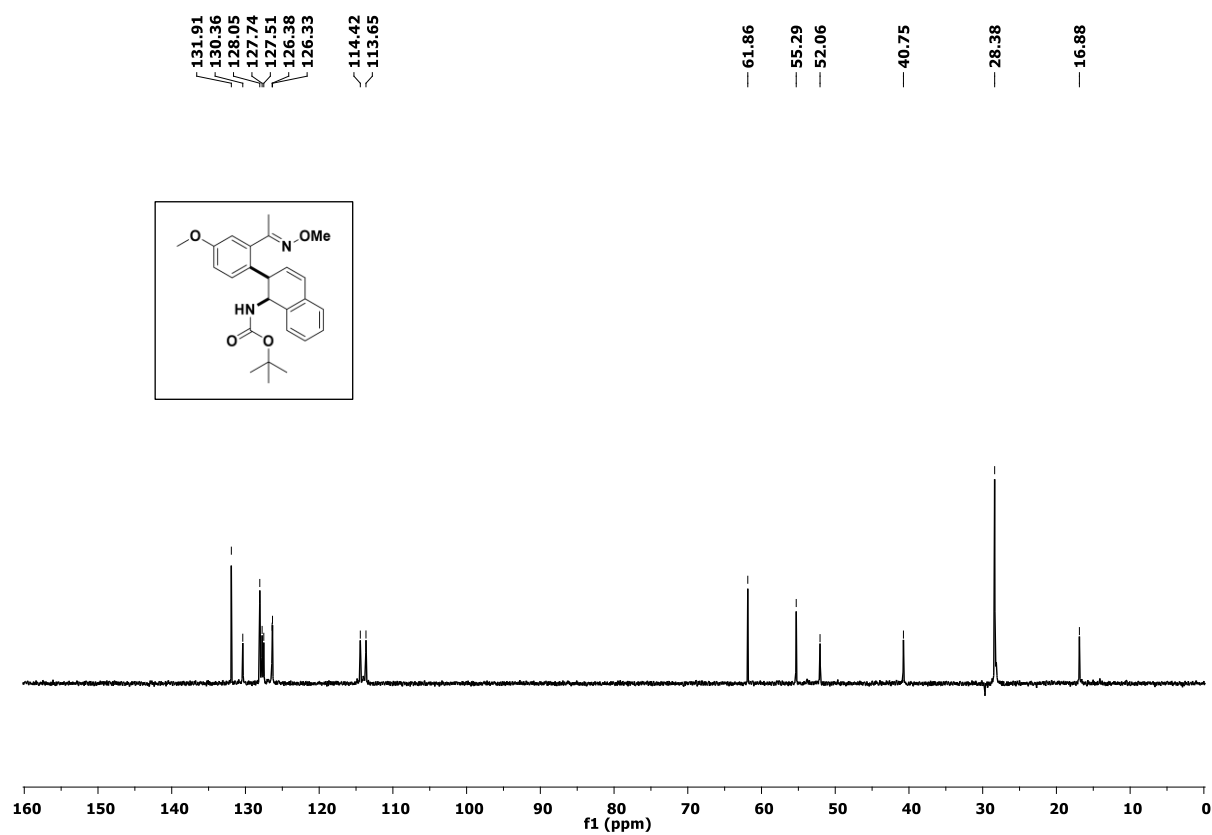



# <sup>1</sup>H and <sup>13</sup>C NMR Spectra of Compound **3pa**.

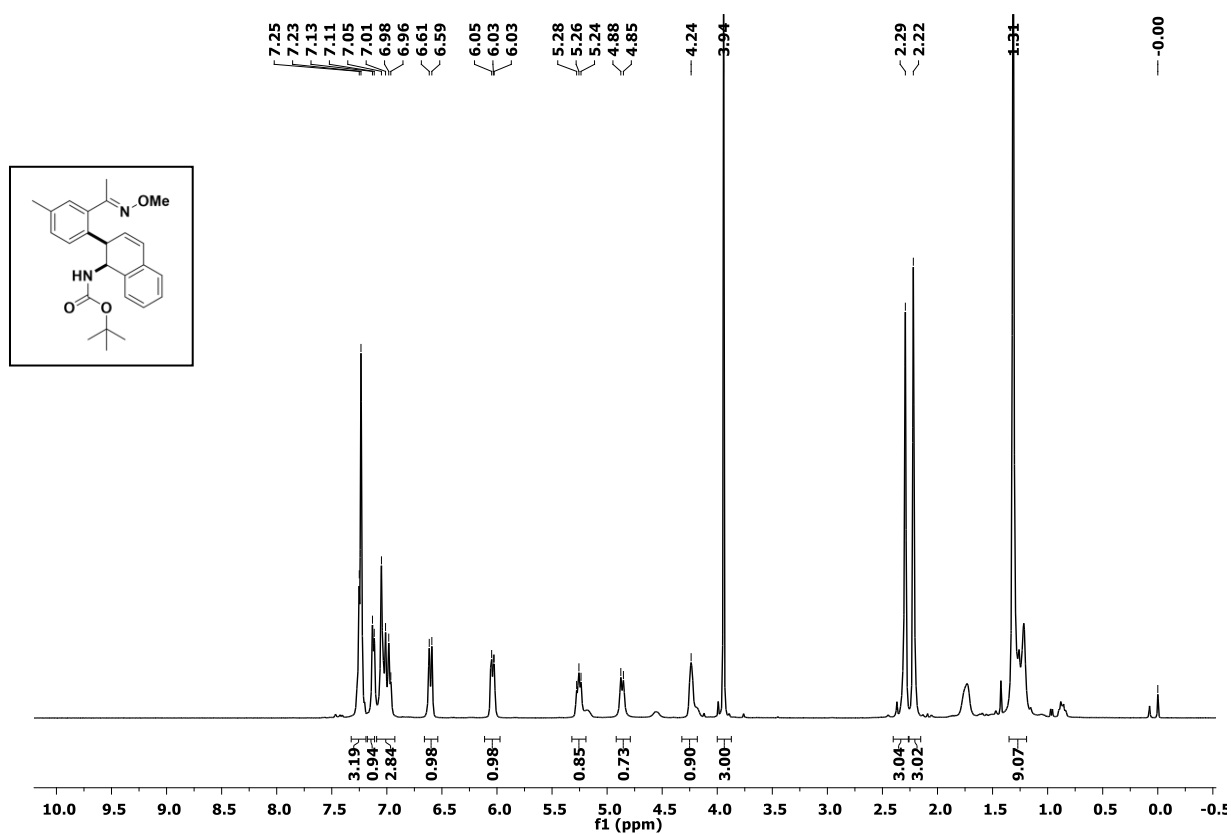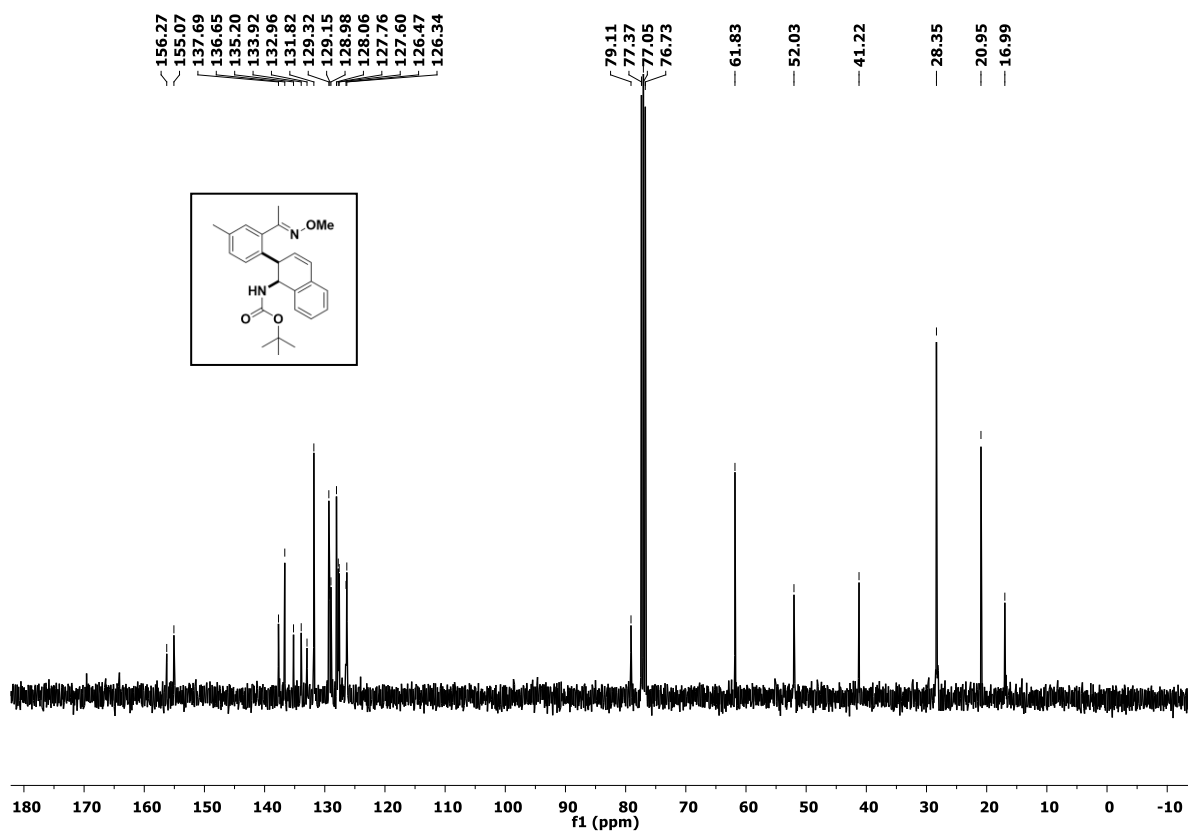



# DEPT (135) NMR Spectrum of Compound **3pa**.

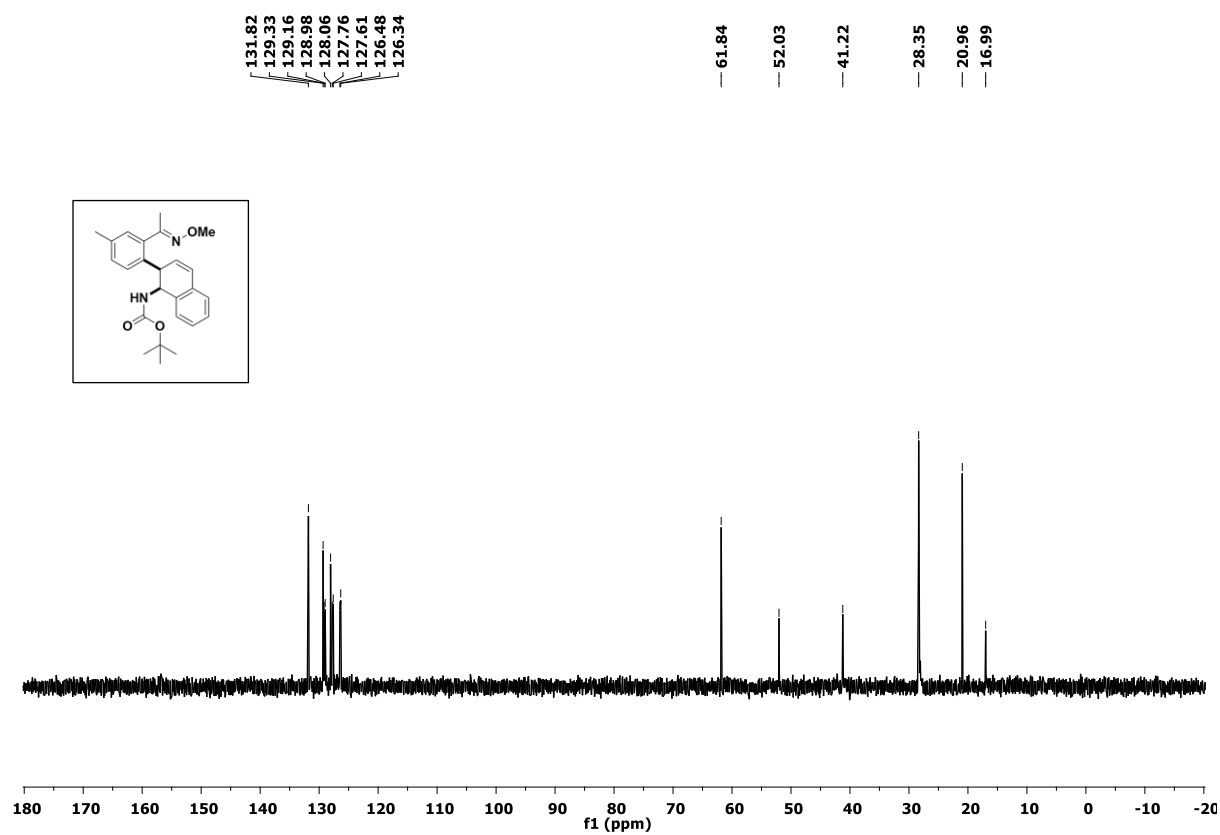



$^1\text{H}$  and  $^{13}\text{C}$  NMR Spectra of Compound **3qa**.

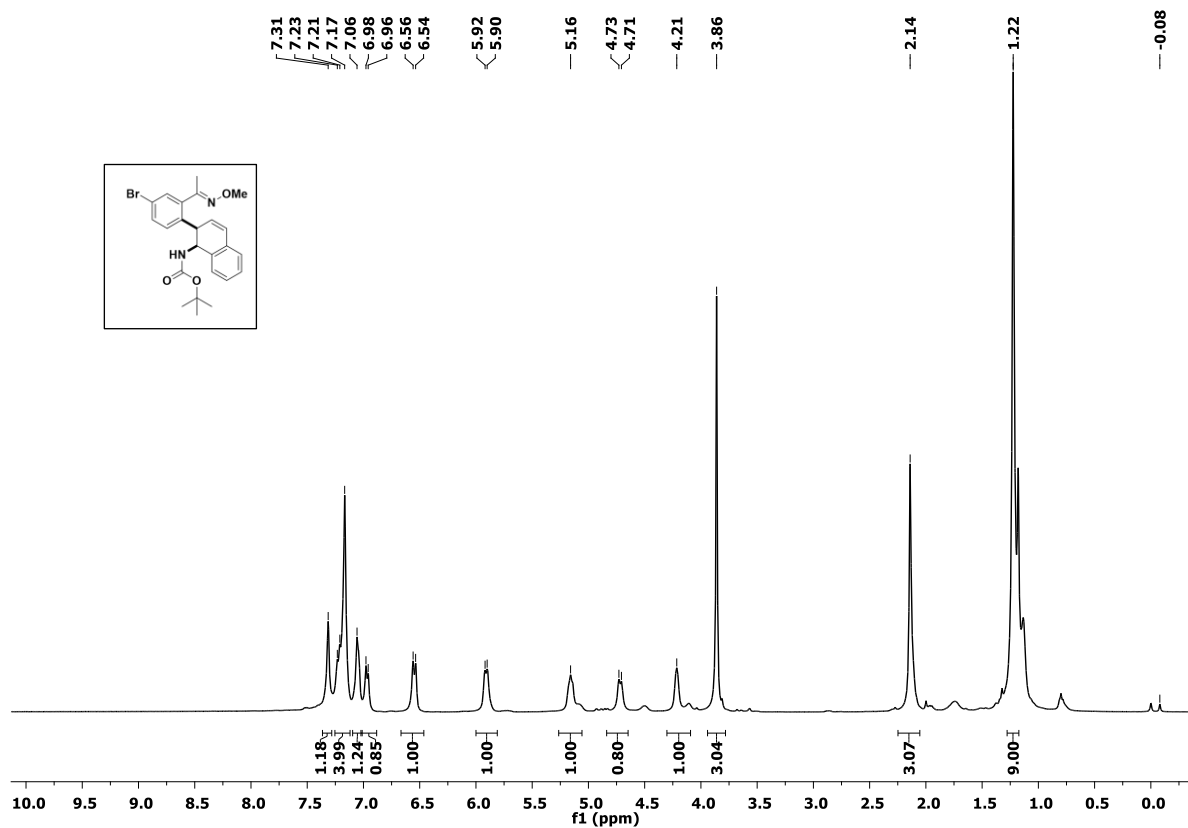

The NMR was taken at 50 °C. The bumps range 5.0 ppm and 4.4 ppm were disappeared

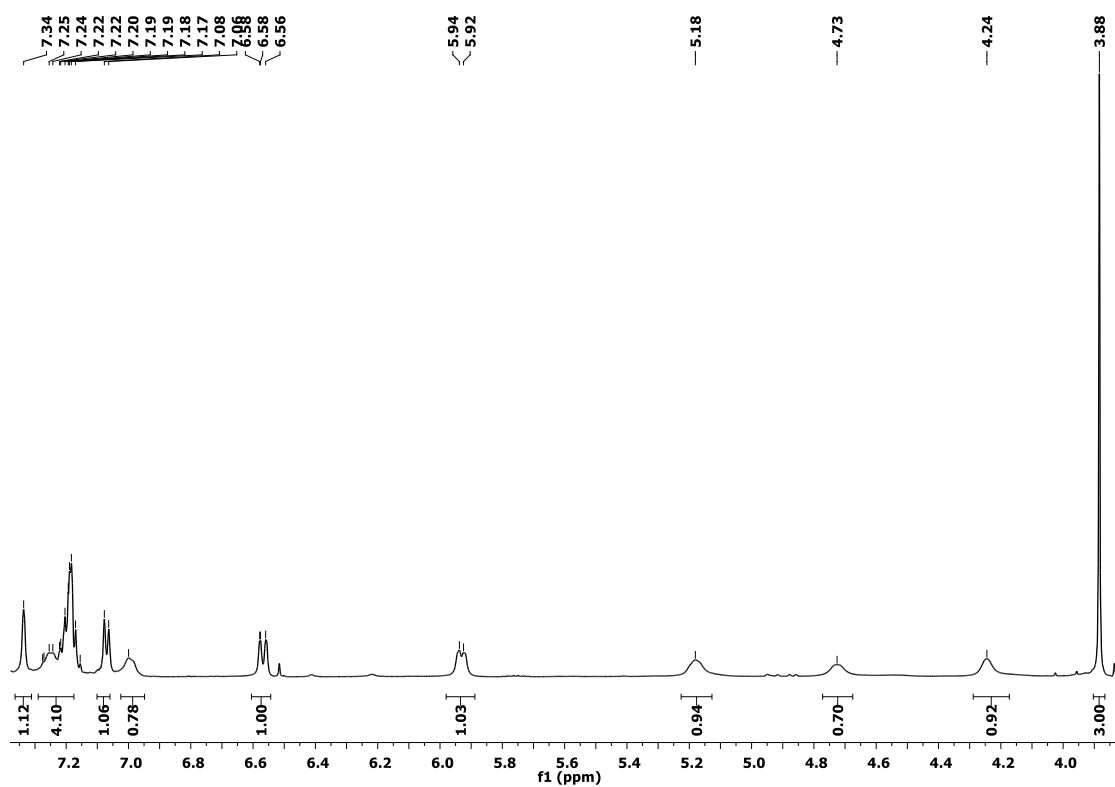



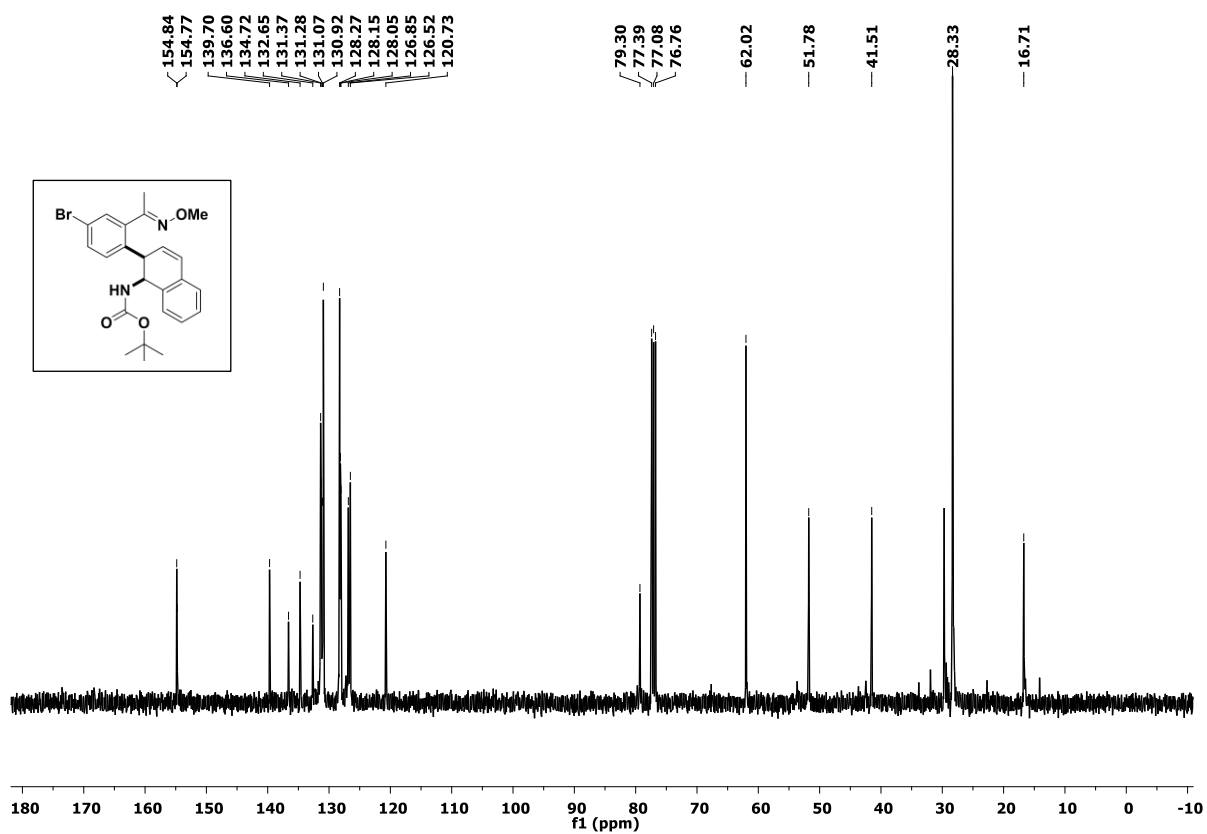



# $^1\text{H}$ and $^{13}\text{C}$ NMR Spectra of Compound **3ra**.

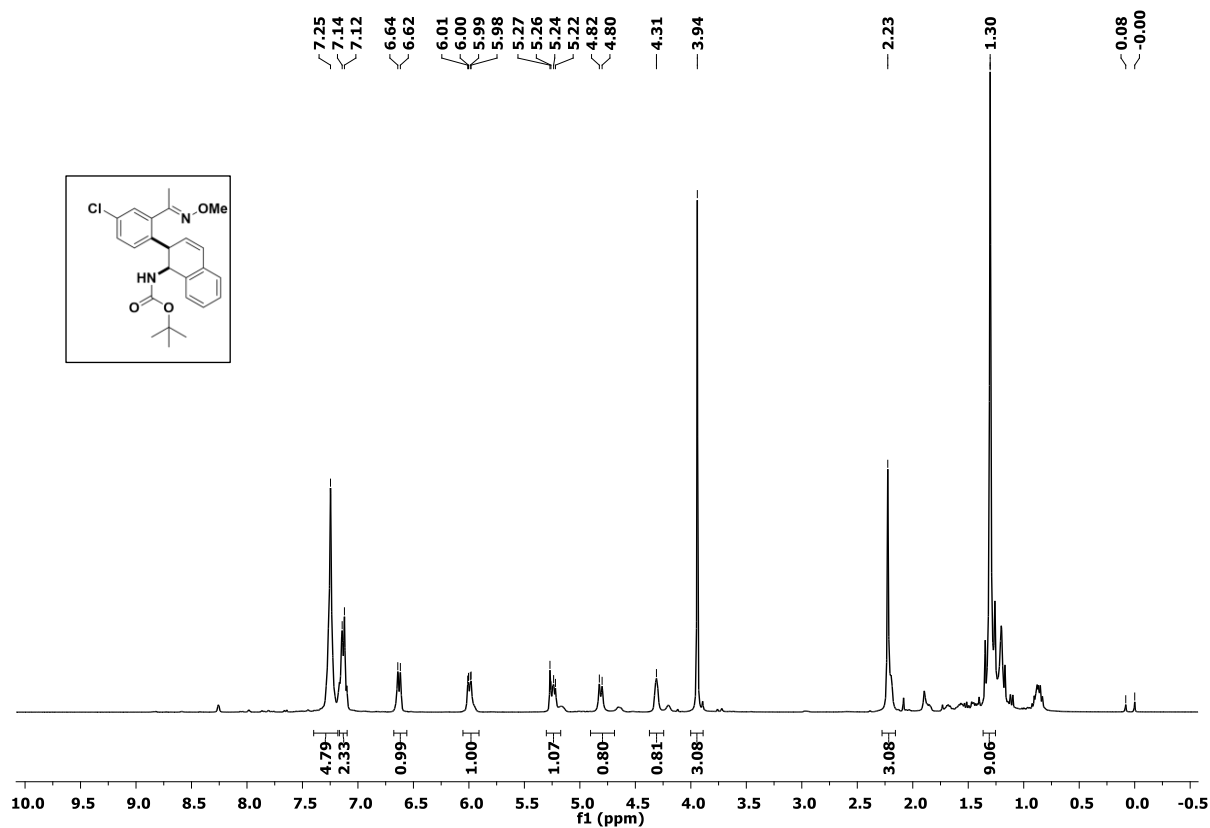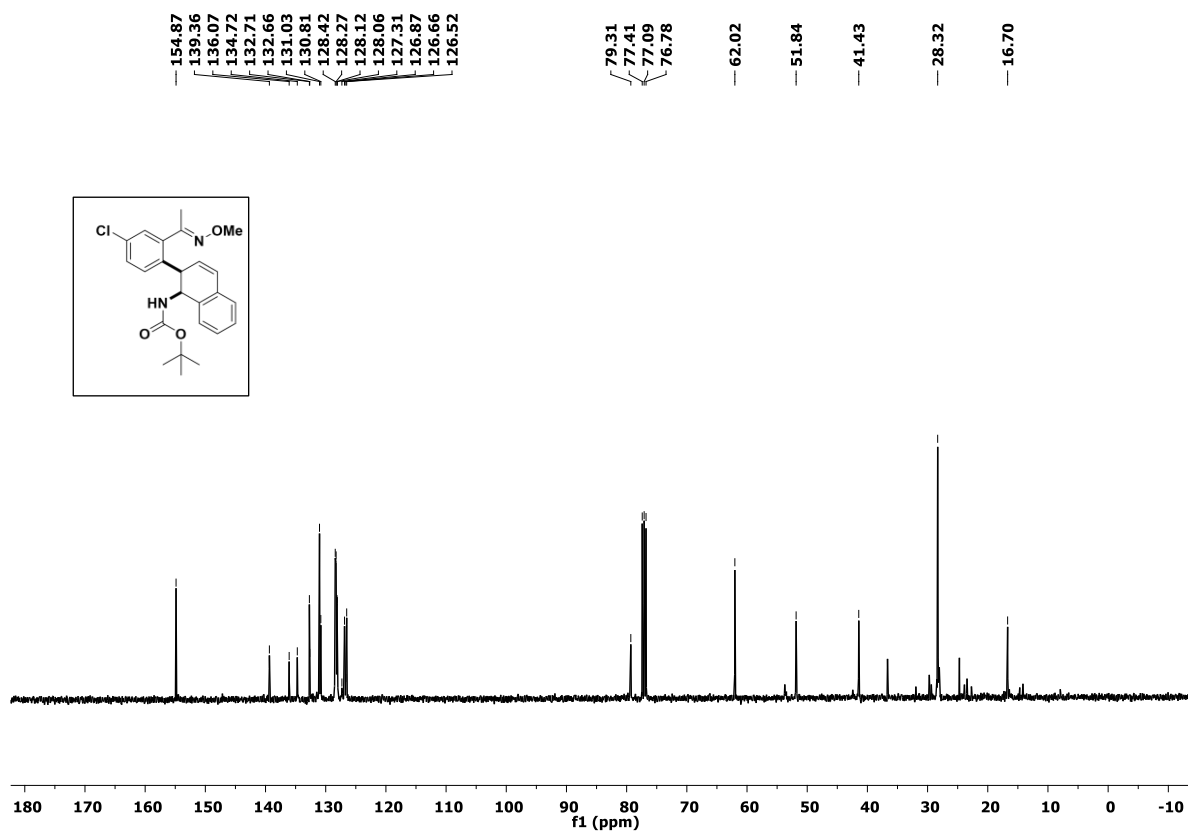



$^1\text{H}$  and  $^{13}\text{C}$  NMR Spectra of Compound **3sa**.

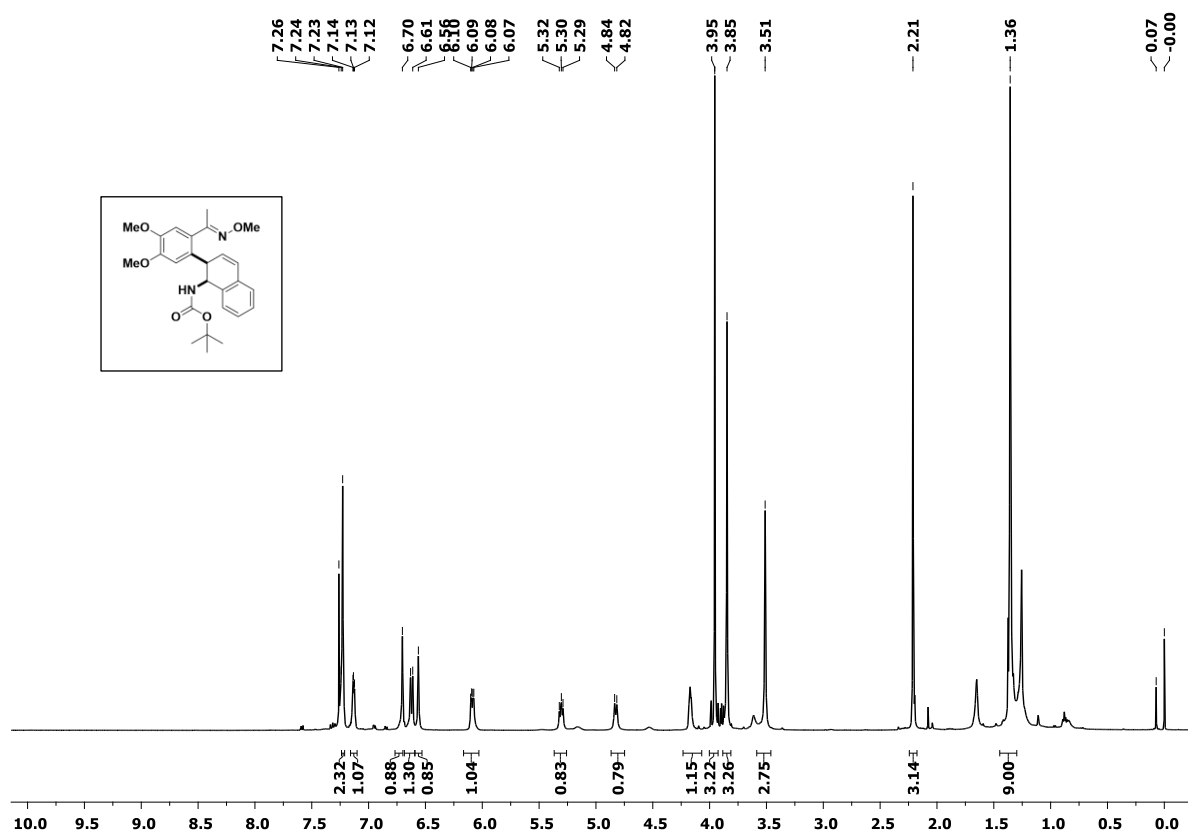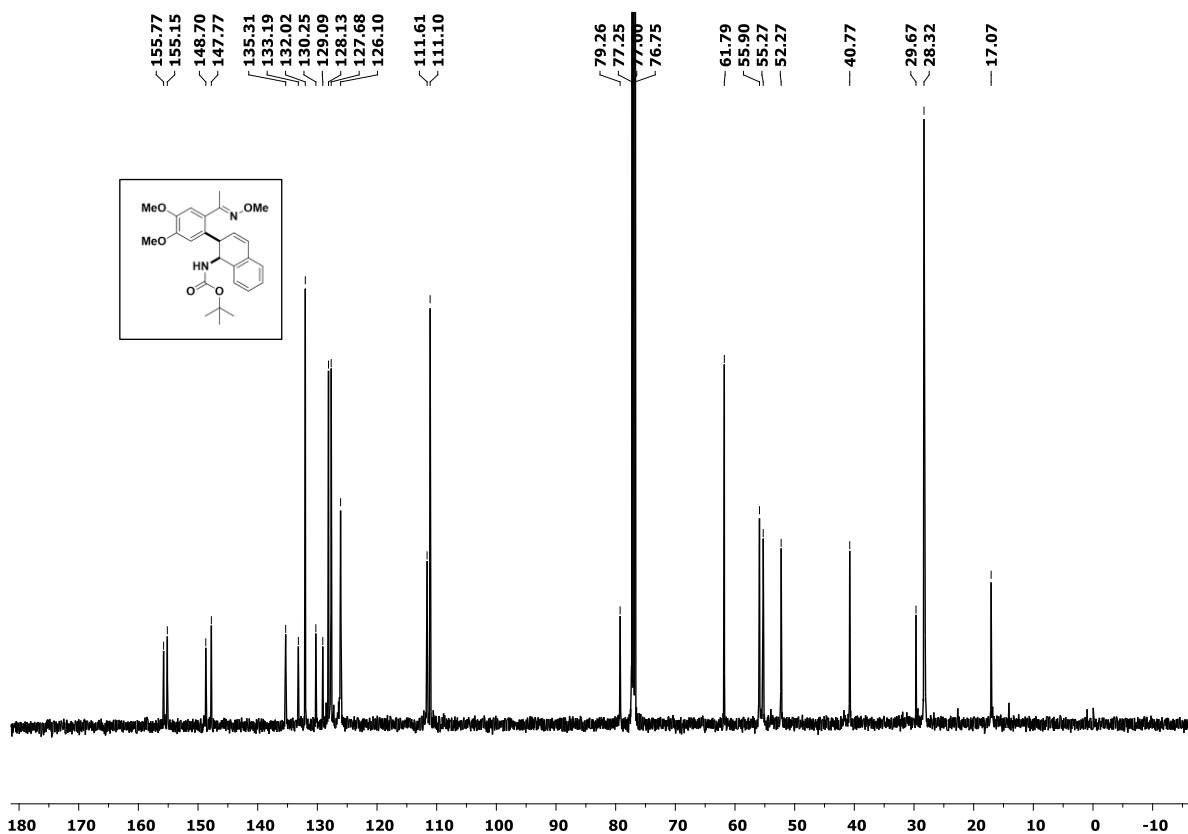



Chemical structure of the compound is shown in the inset:

COC(=N)C(C1=CC=C(C=C1)C(=O)OC(C)(C)C)C2=CC(OC)=C(OC)C=C2

<sup>13</sup>C NMR spectrum (f1 (ppm)) showing peaks at:

- 132.05, 128.16, 127.71, 126.13 (aromatic region)
- 111.63, 111.11 (aromatic region)
- 61.82 (N-methoxy)
- 55.92, 55.30, 52.29 (ester/methoxy region)
- 40.79 (ester/methoxy region)
- 28.35 (tert-butyl methyls)
- 17.10 (tert-butyl methyls)



$^1\text{H}$  and  $^{13}\text{C}$  NMR Spectra of Compound **3ta**.

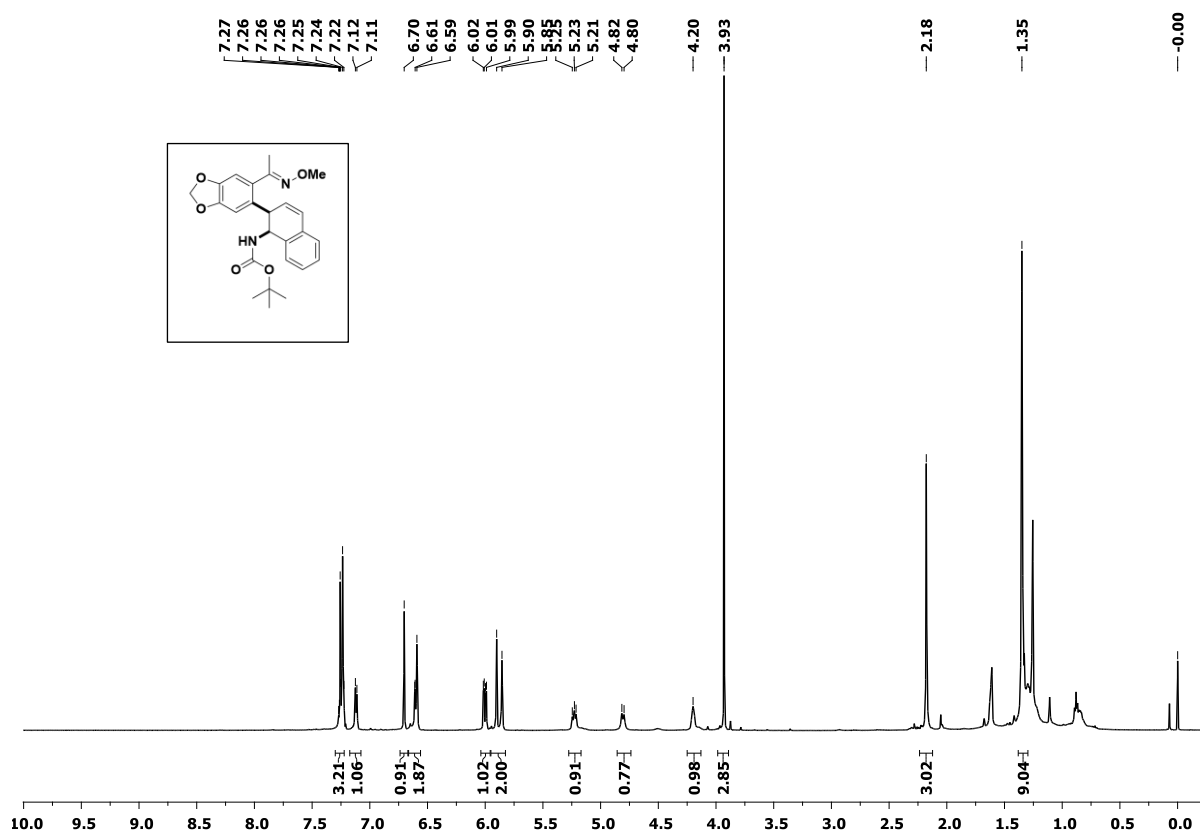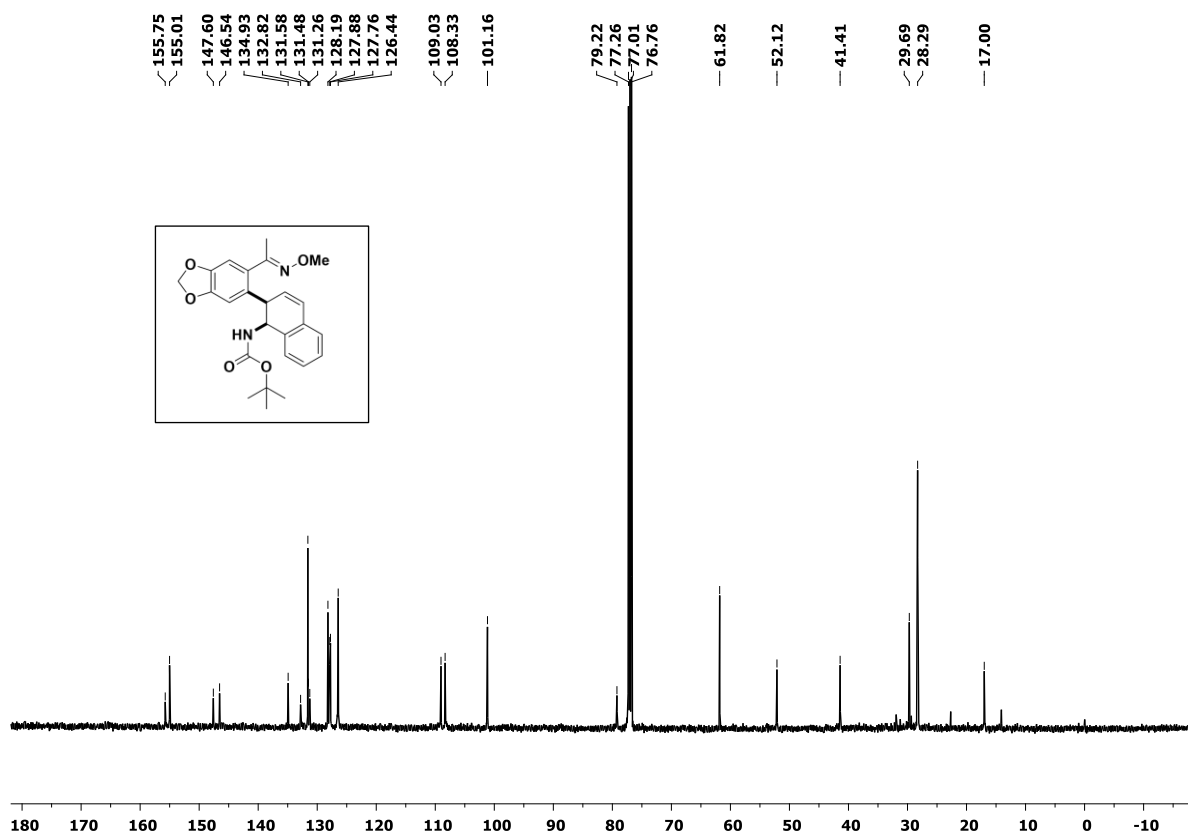



# DEPT (135) NMR Spectrum of Compound **3ta**.

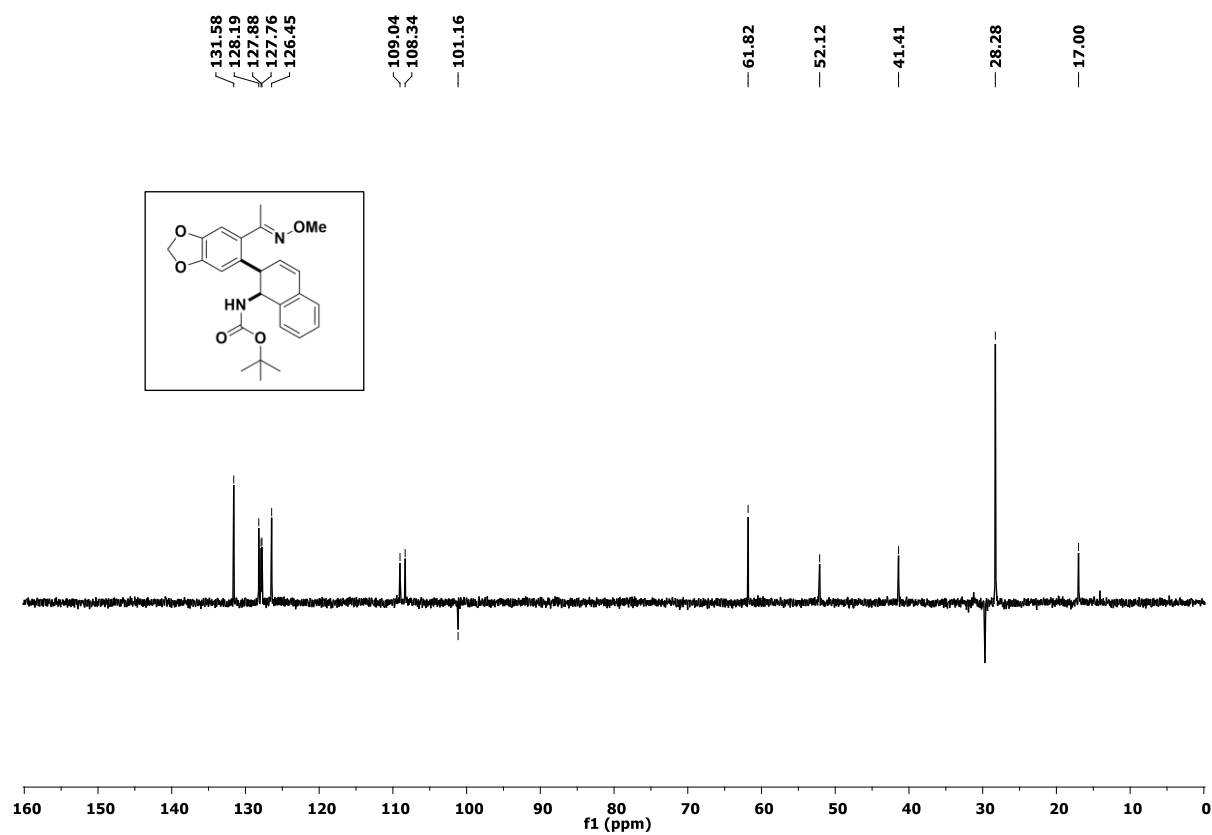



$^1\text{H}$  and  $^{13}\text{C}$  NMR Spectra of Compound **3ua**.

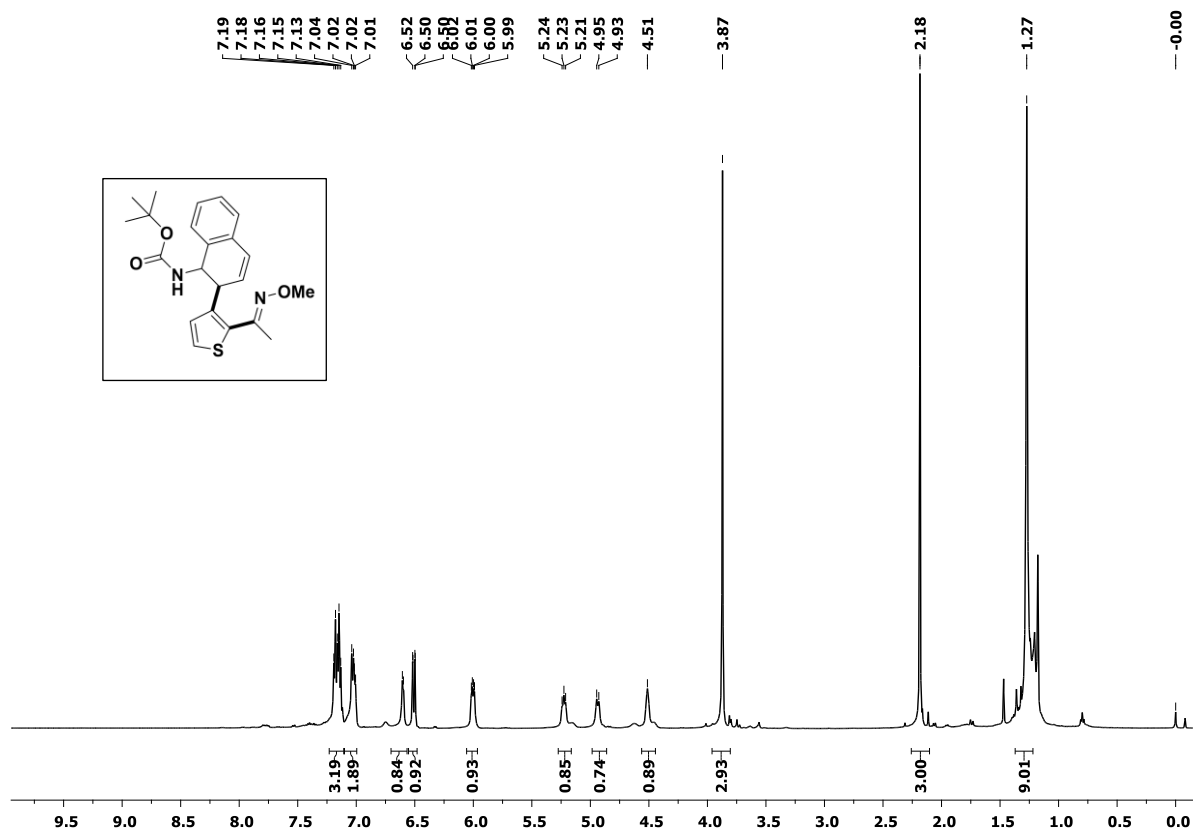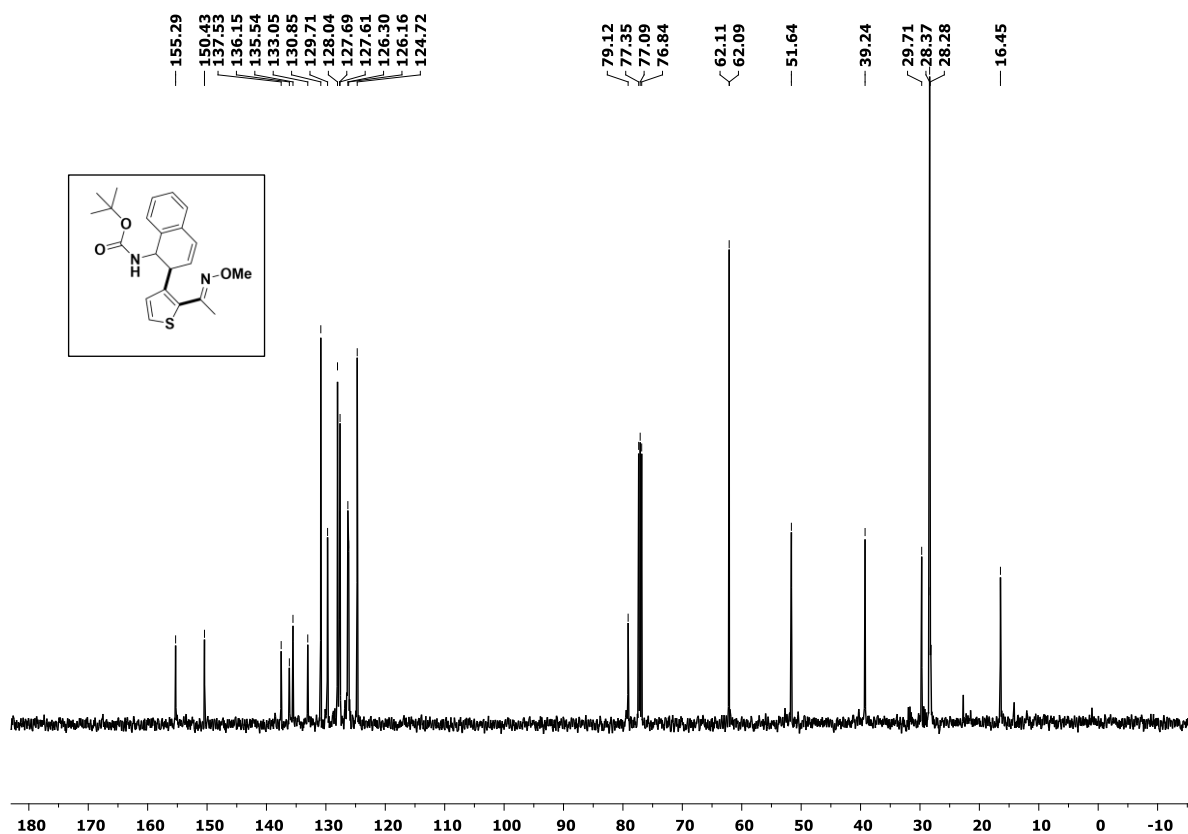



DEPT (135) NMR Spectrum of Compound **3ua**.

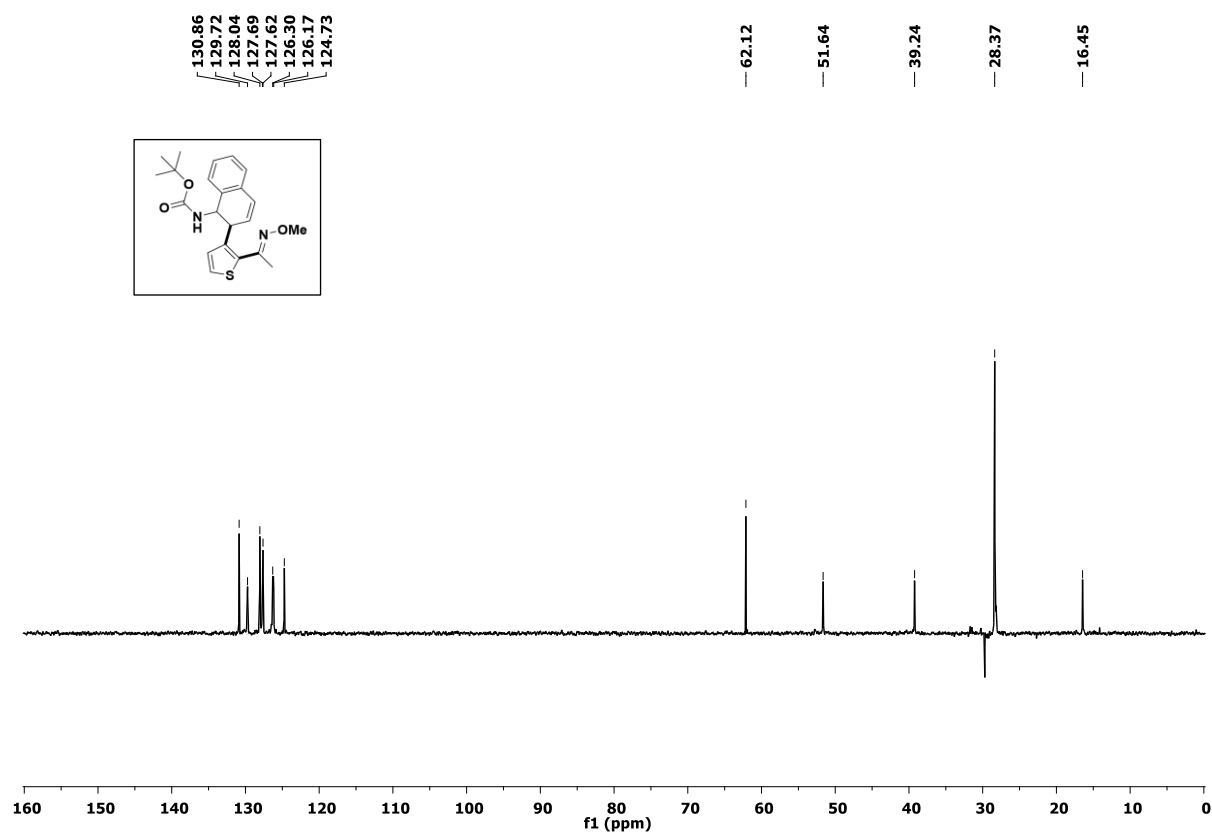



$^1\text{H}$  and  $^{13}\text{C}$  NMR Spectra of Compound **3eb**.

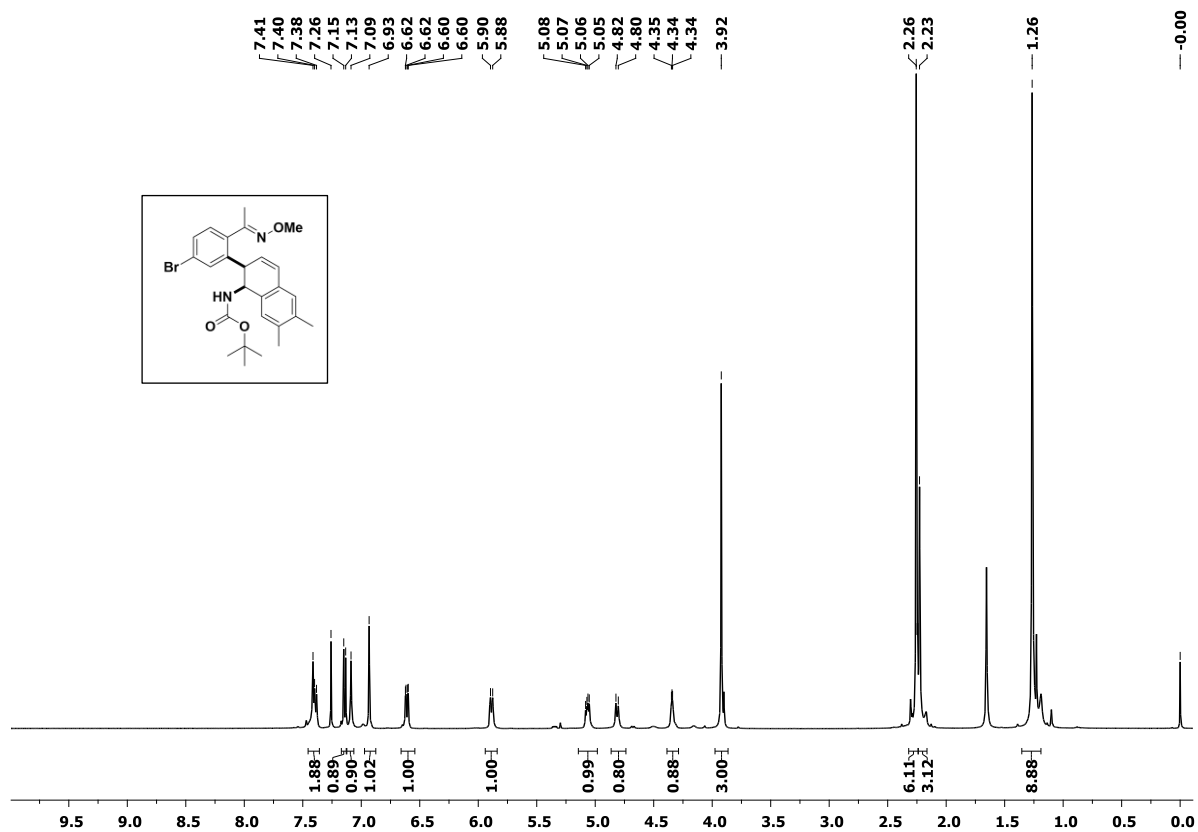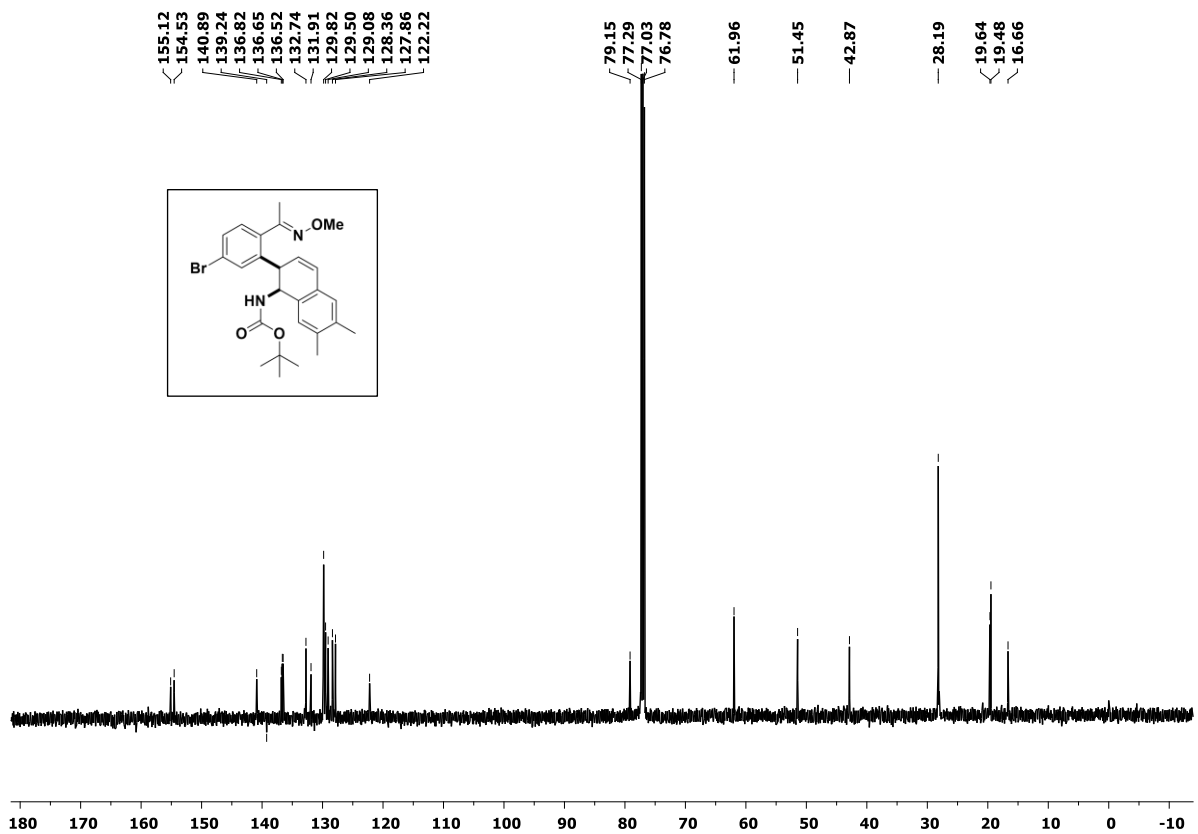



DEPT (135) NMR Spectrum of Compound **3eb**.

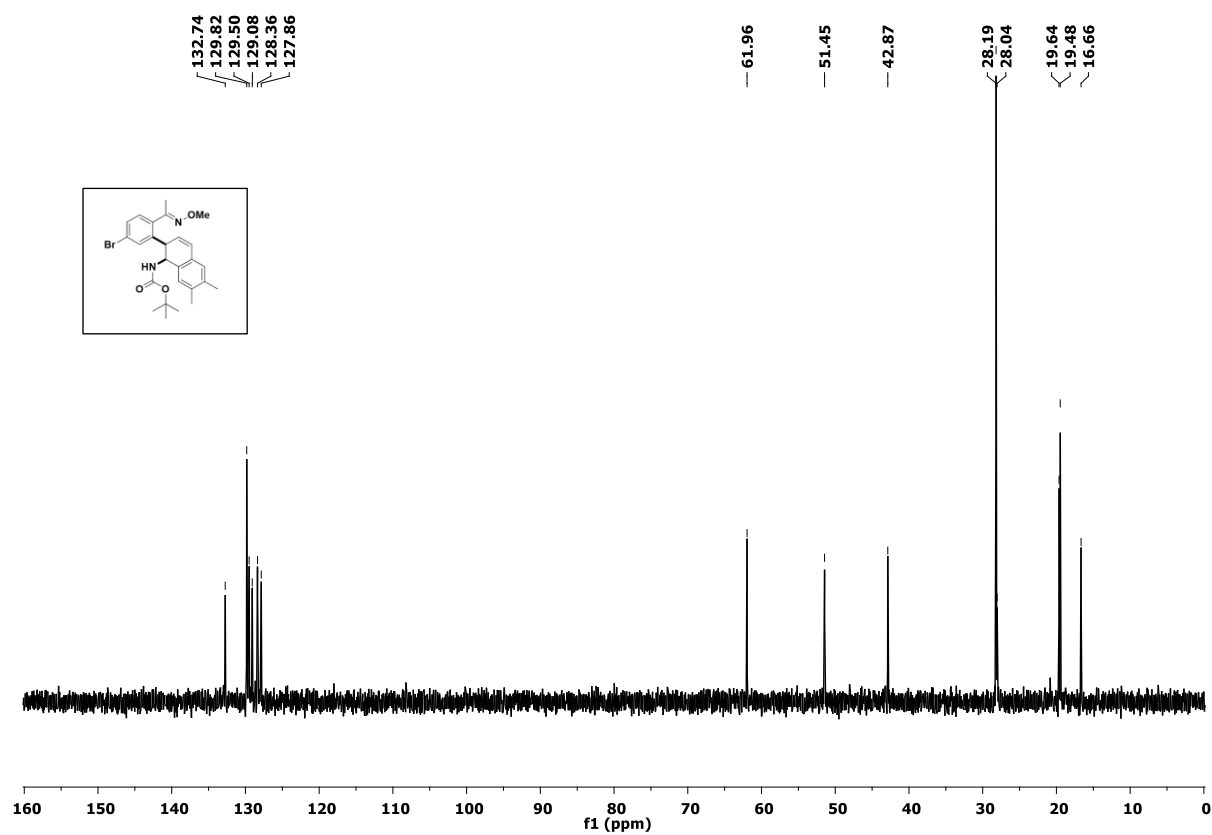



$^1\text{H}$  and  $^{13}\text{C}$  NMR Spectra of Compound **3cc**.

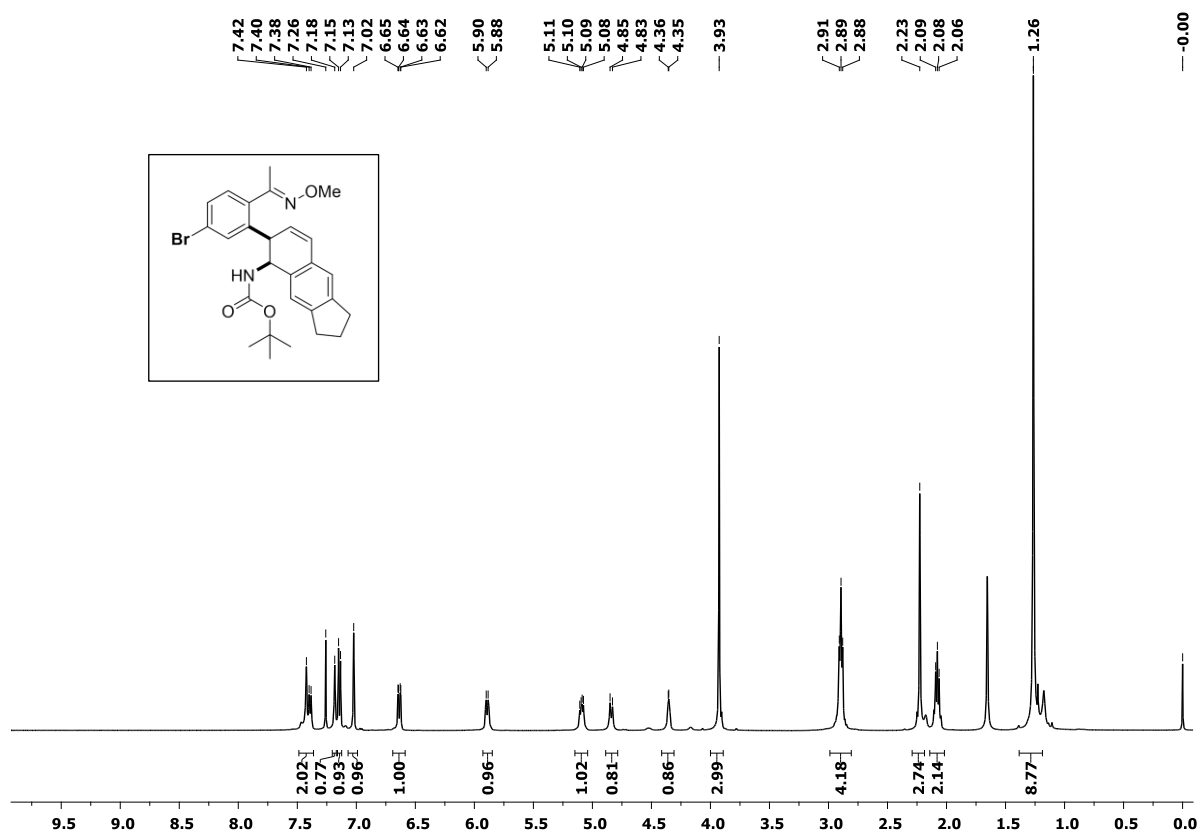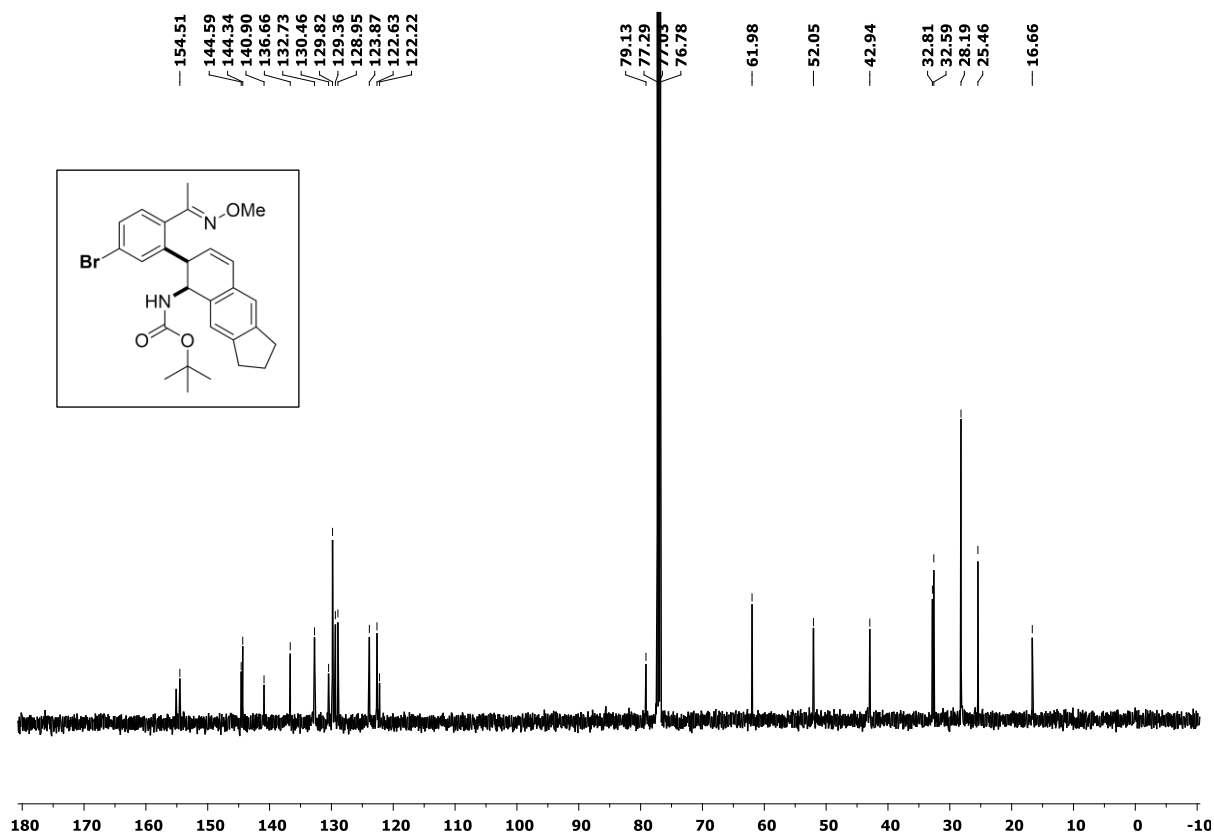



# DEPT (135) NMR Spectrum of Compound **3cc**.

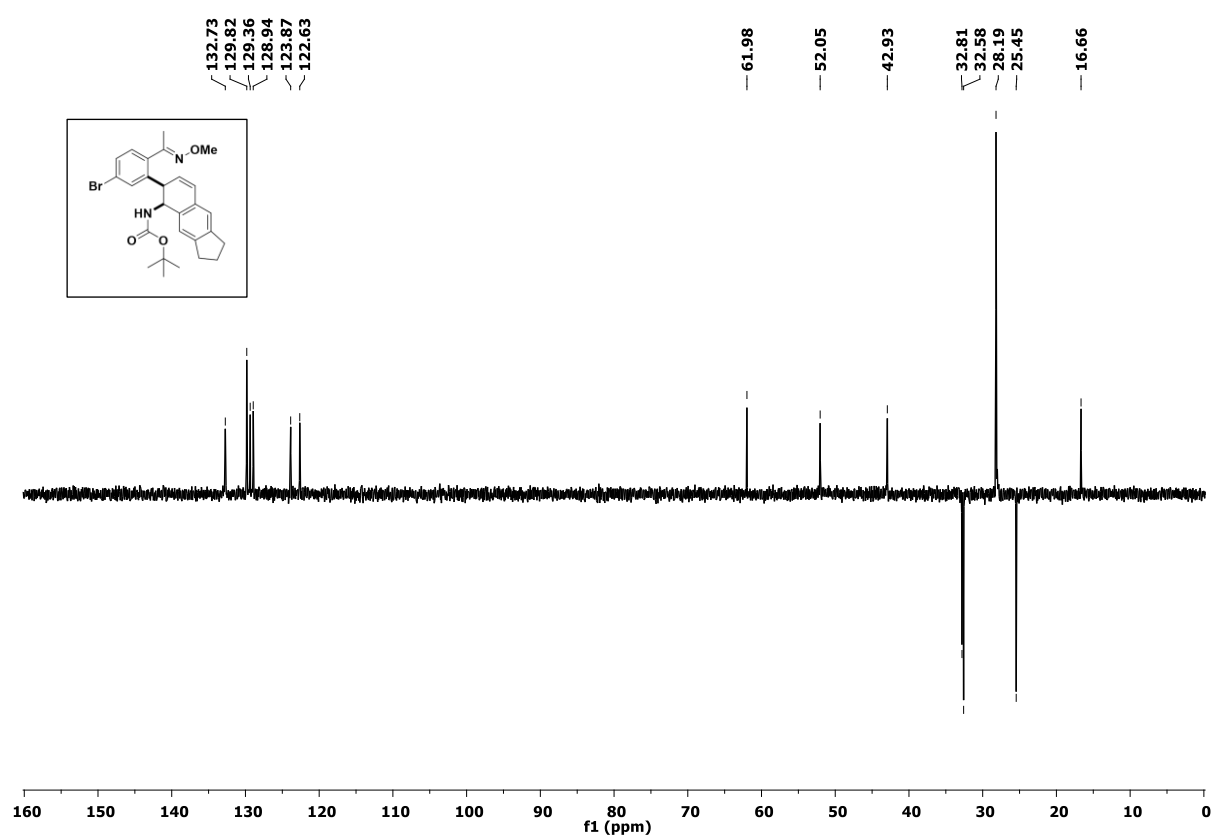



$^1\text{H}$  and  $^{13}\text{C}$  NMR Spectra of Compound **3ec**.

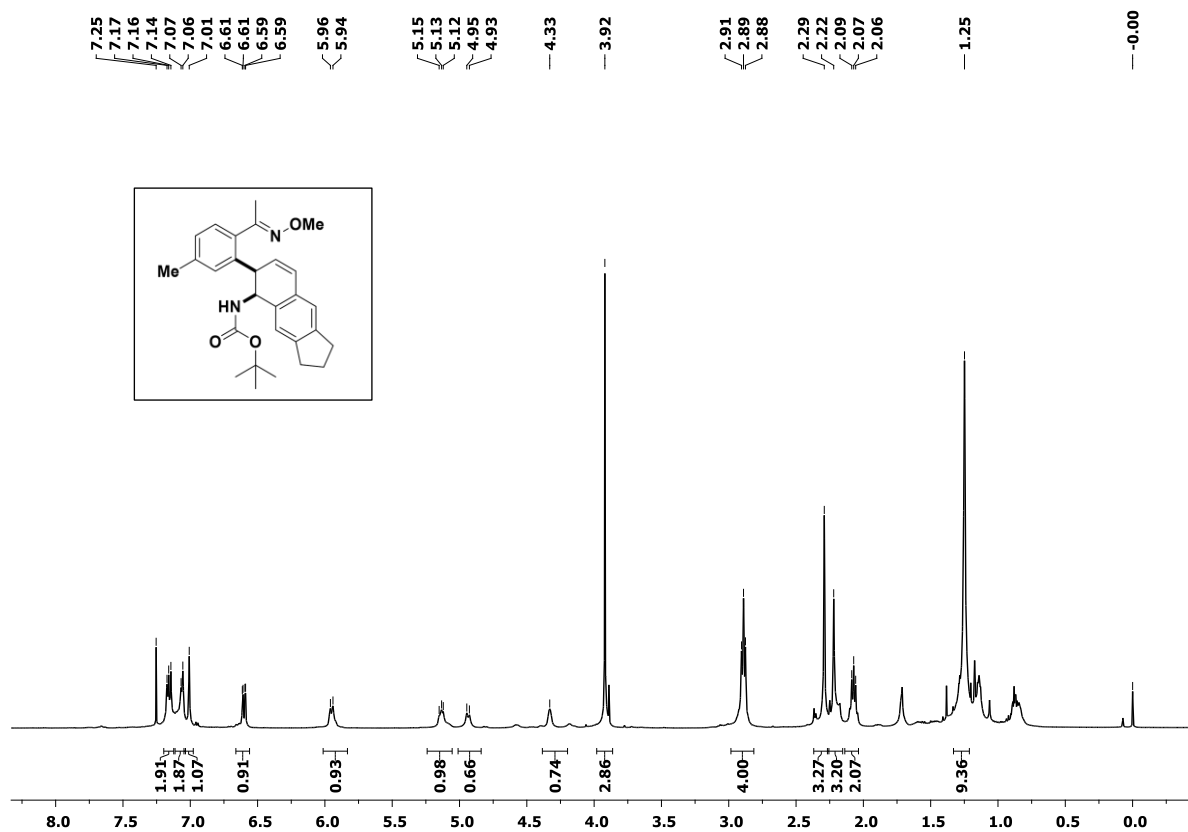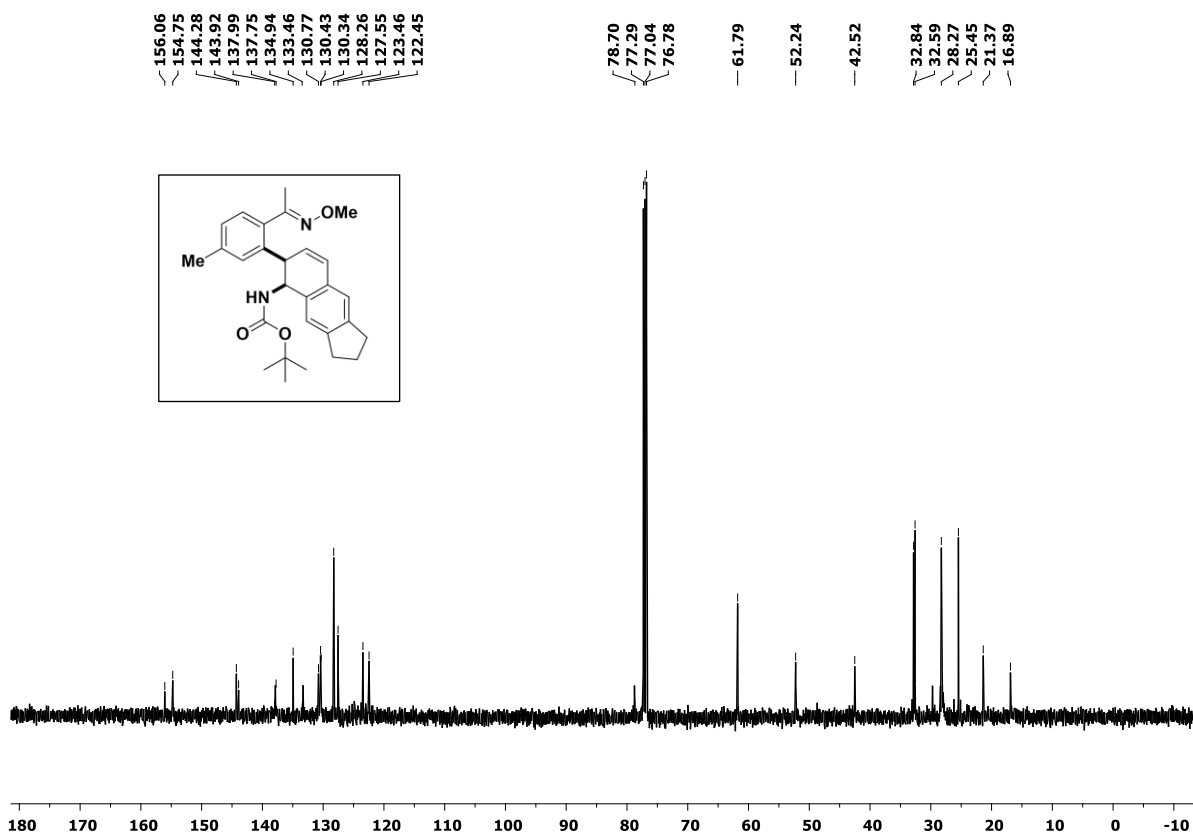



$^1\text{H}$  and  $^{13}\text{C}$  NMR Spectra of Compound **3cd**.

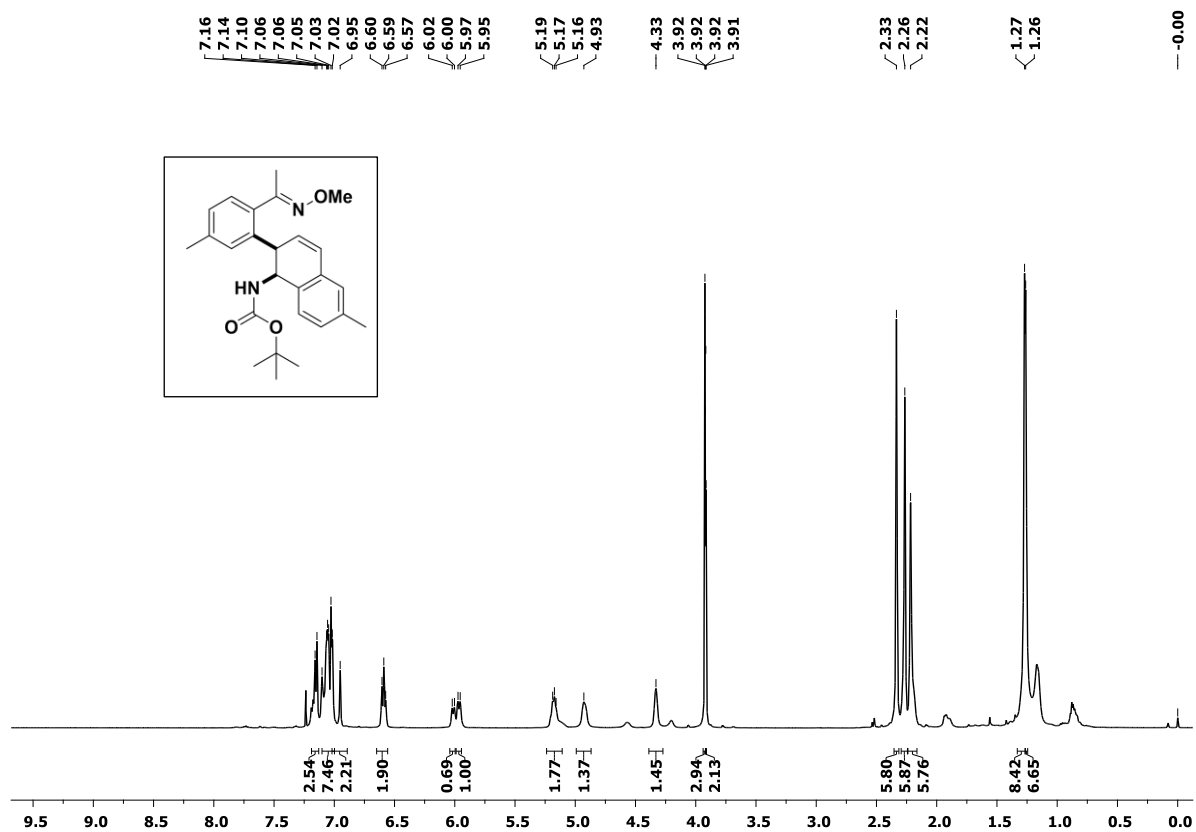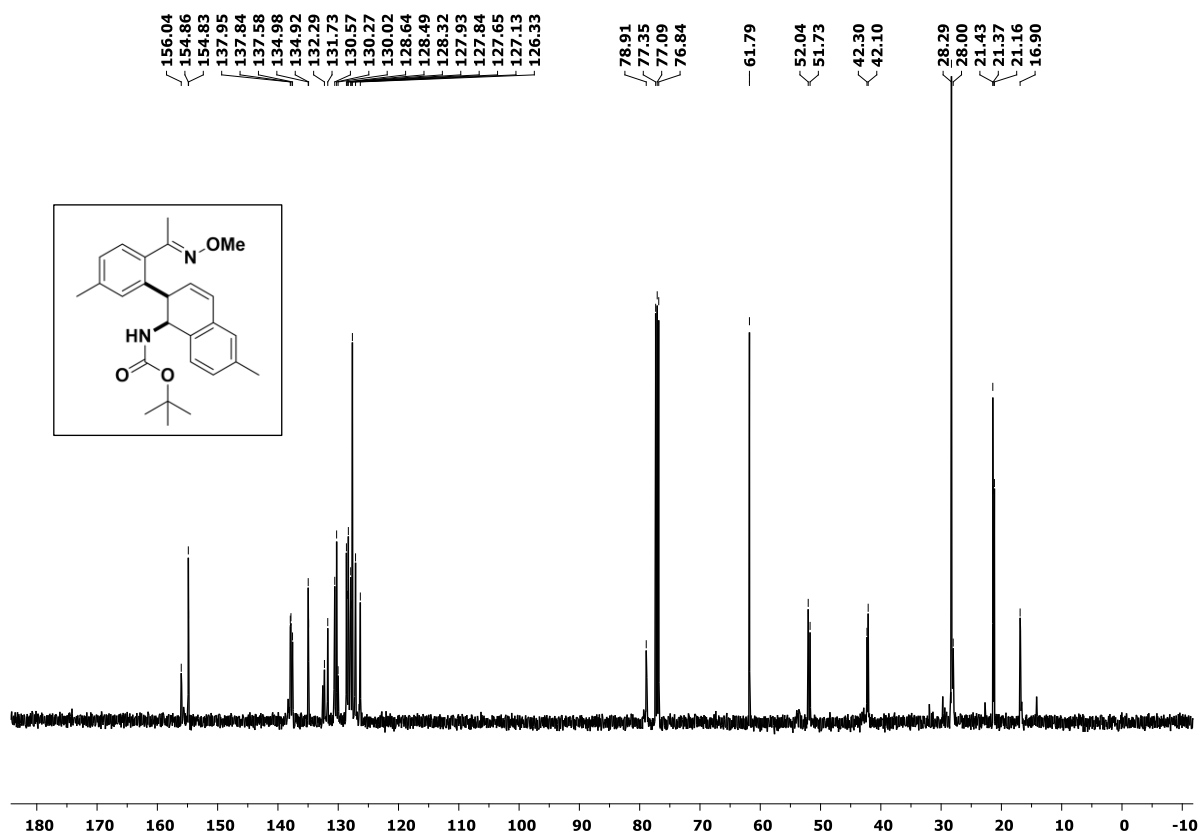



# DEPT (135) NMR Spectrum of Compound **3cd**.

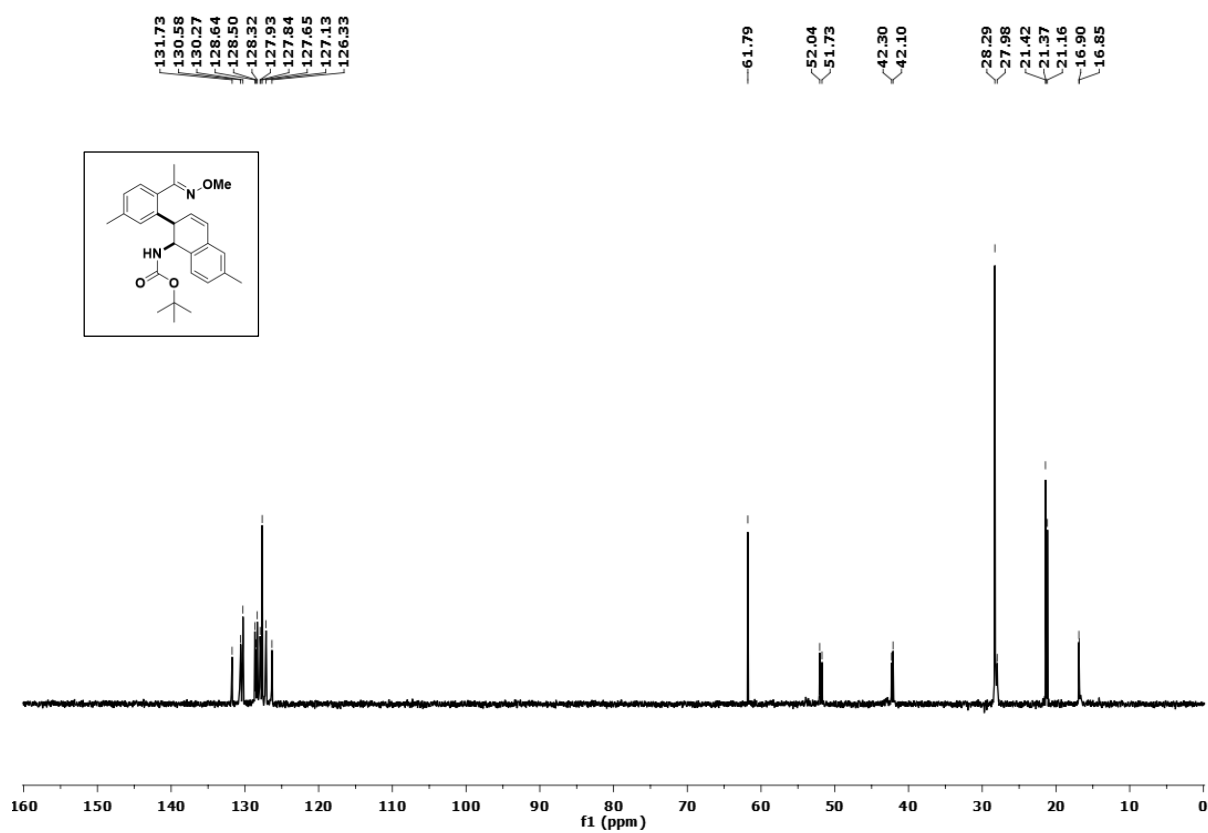



$^1\text{H}$  and  $^{13}\text{C}$  NMR Spectra of Compound **3ee**.

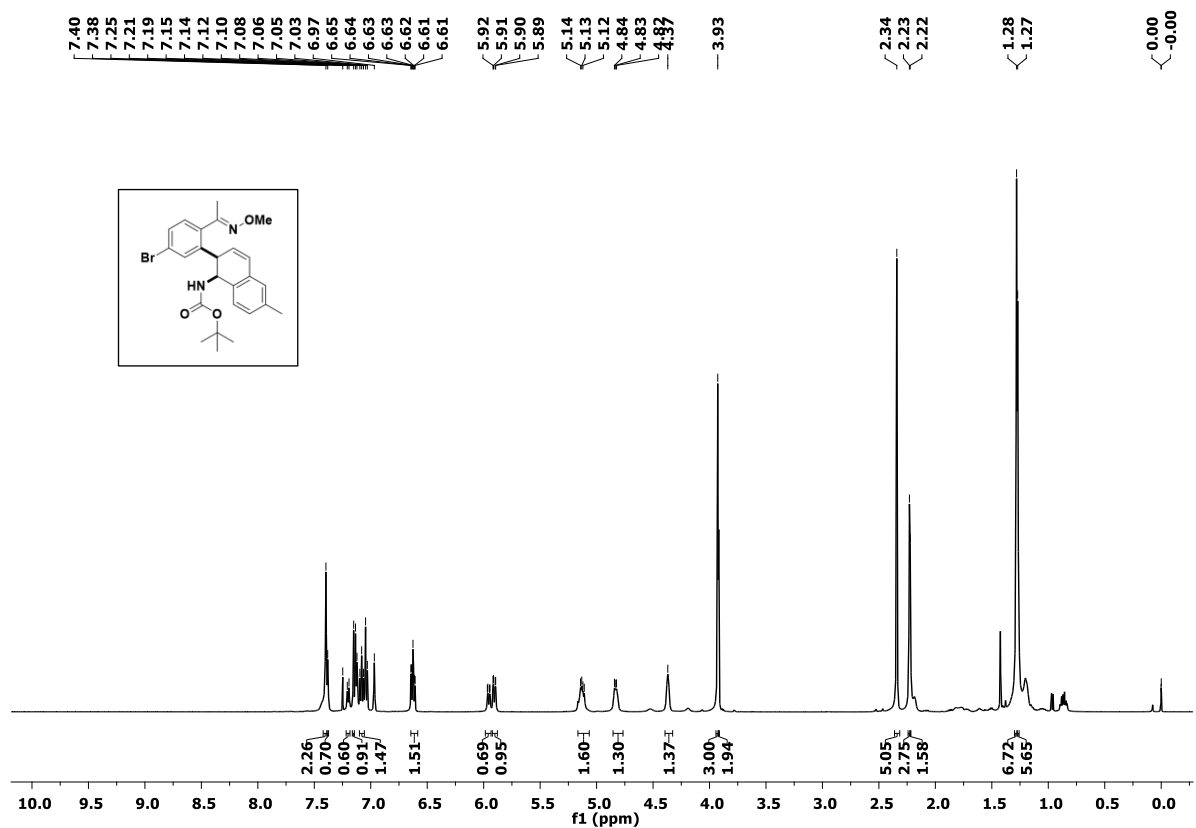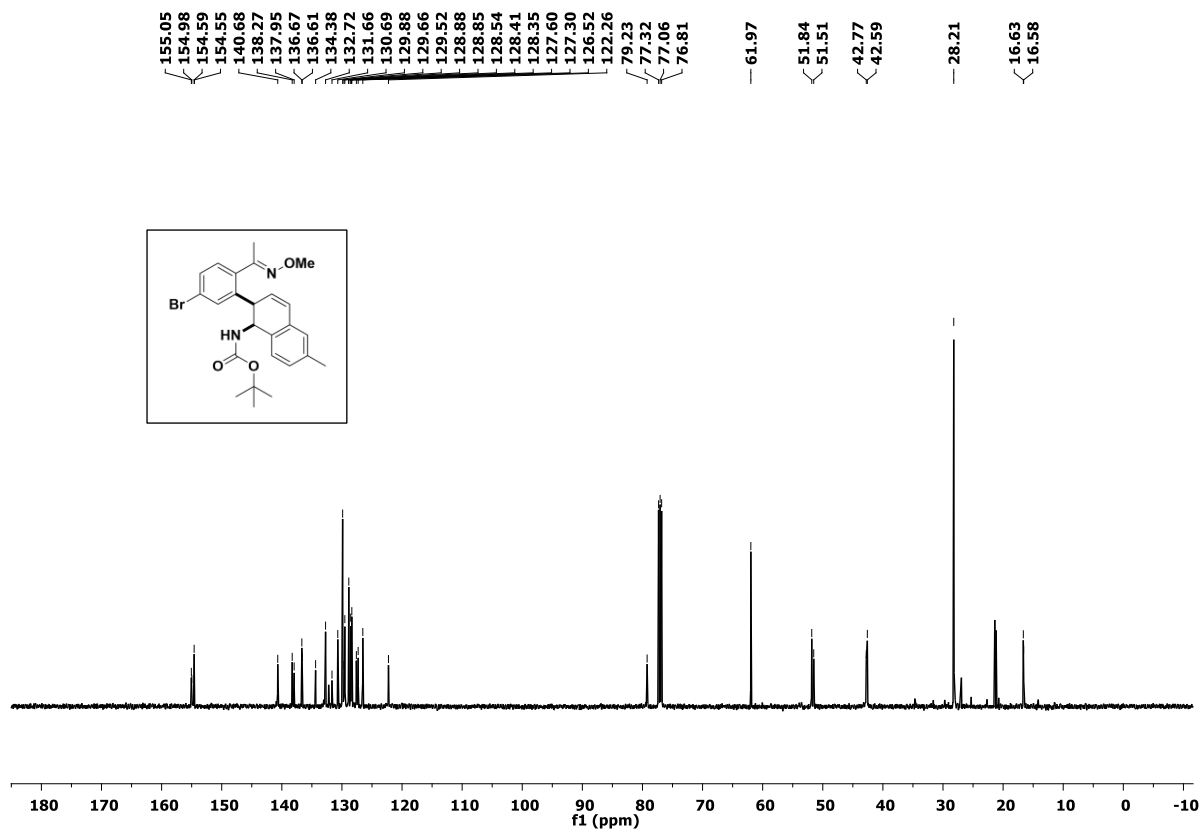



$^1\text{H}$  and  $^{13}\text{C}$  NMR Spectra of Compound **3ae**.

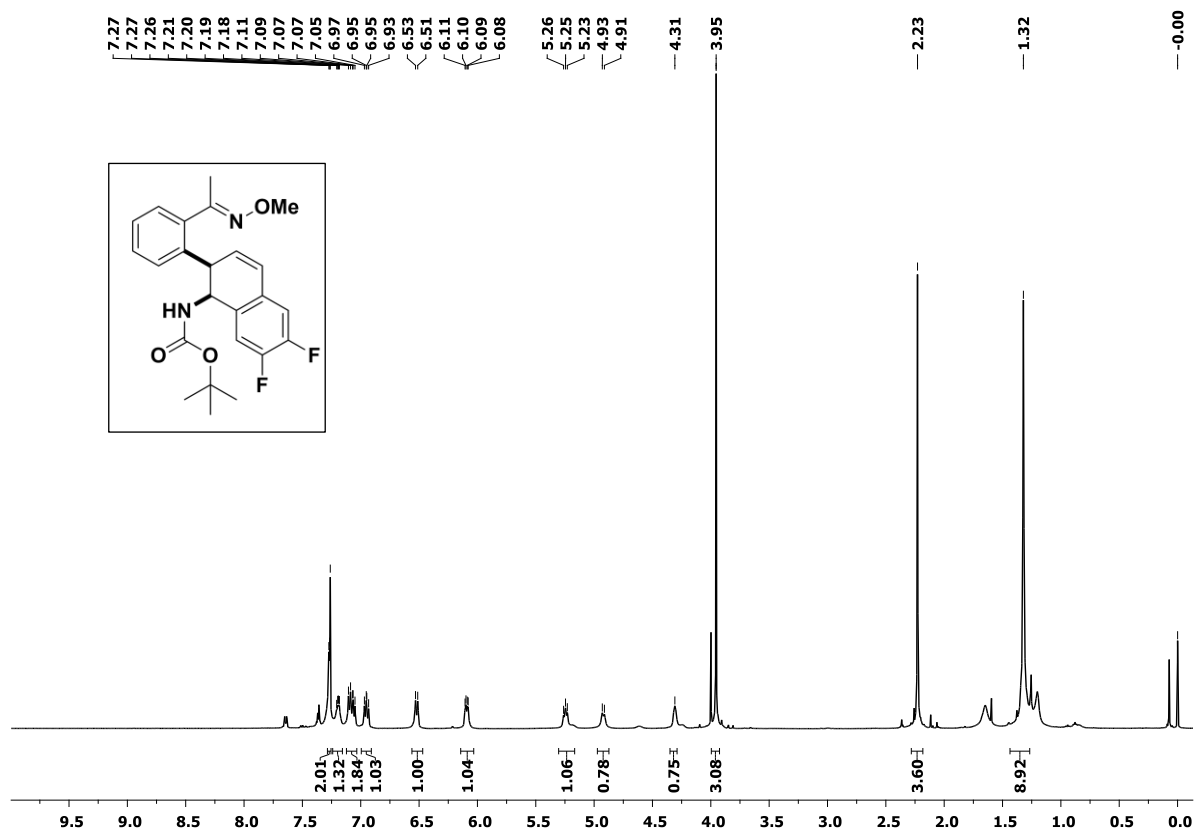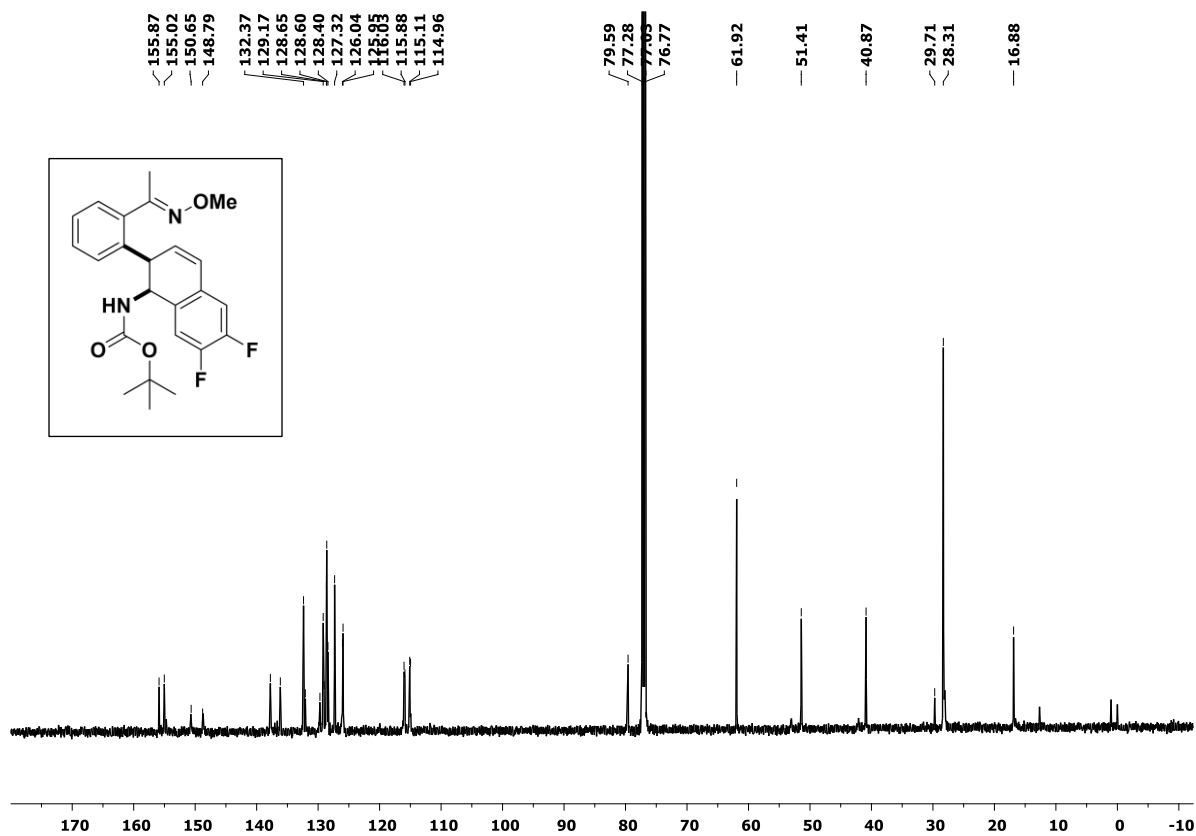



# DEPT (135) NMR Spectrum of Compound **3ae**.

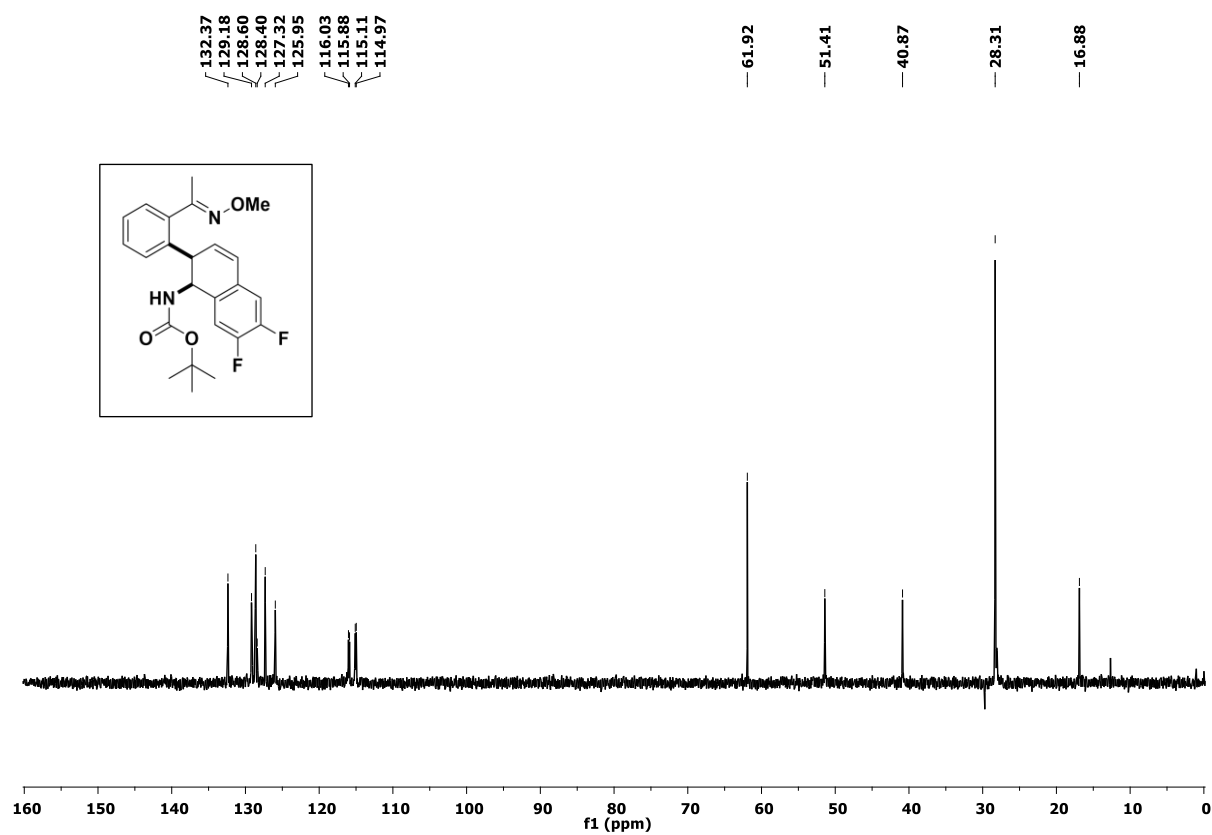



$^1\text{H}$  and  $^{13}\text{C}$  NMR Spectra of Compound **3ec**.

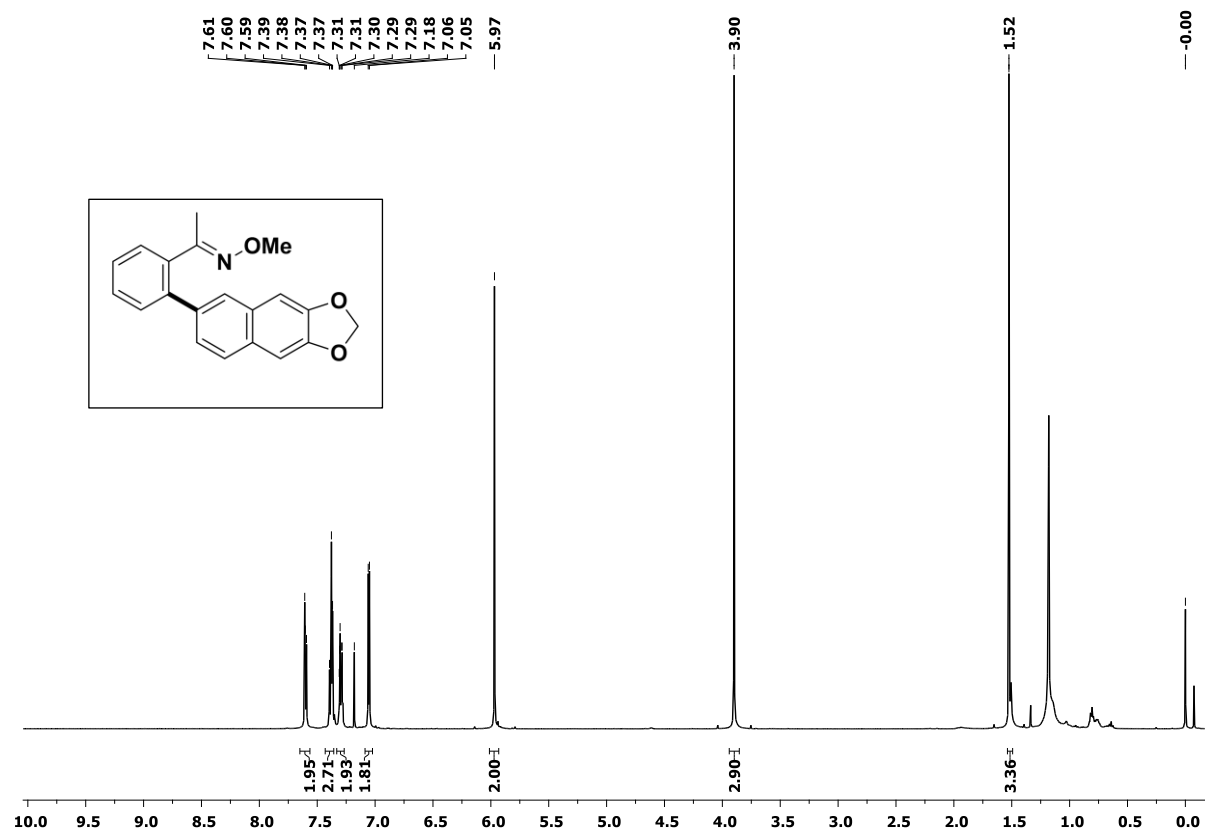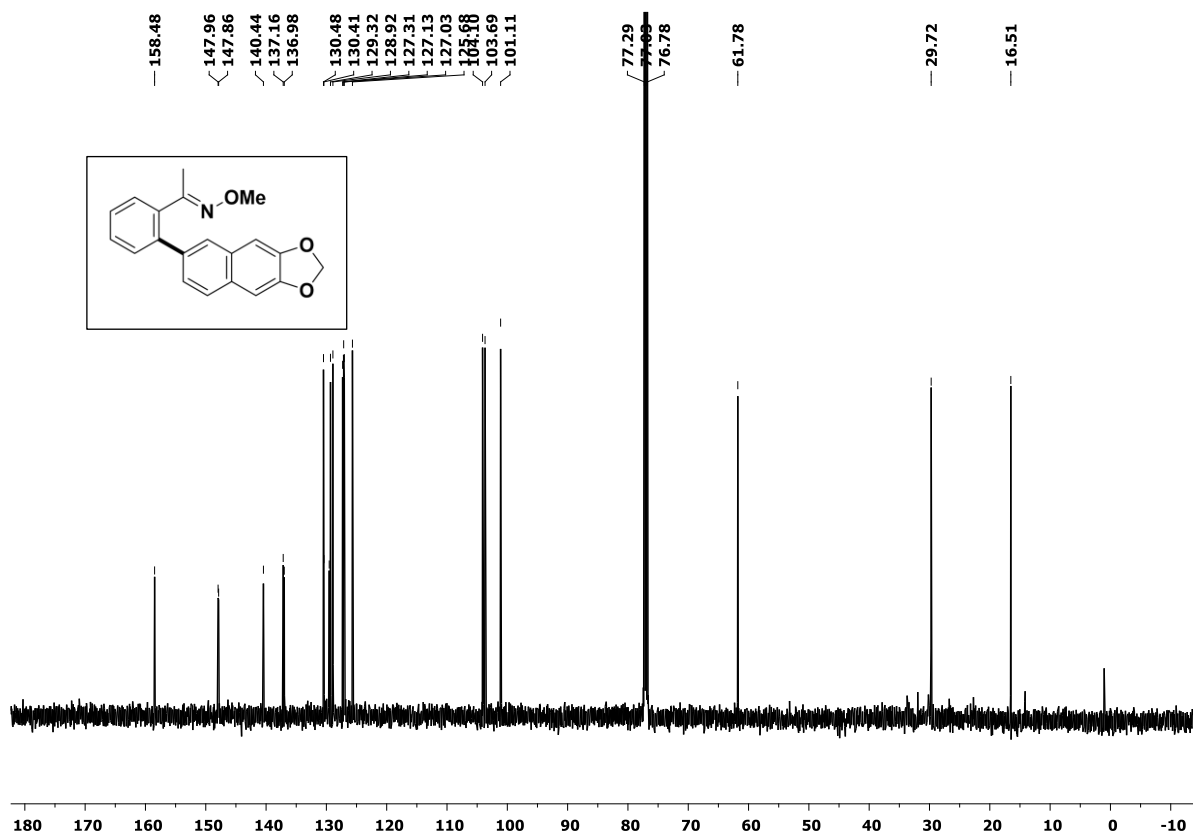



DEPT (135) NMR Spectrum of Compound **3ec**.

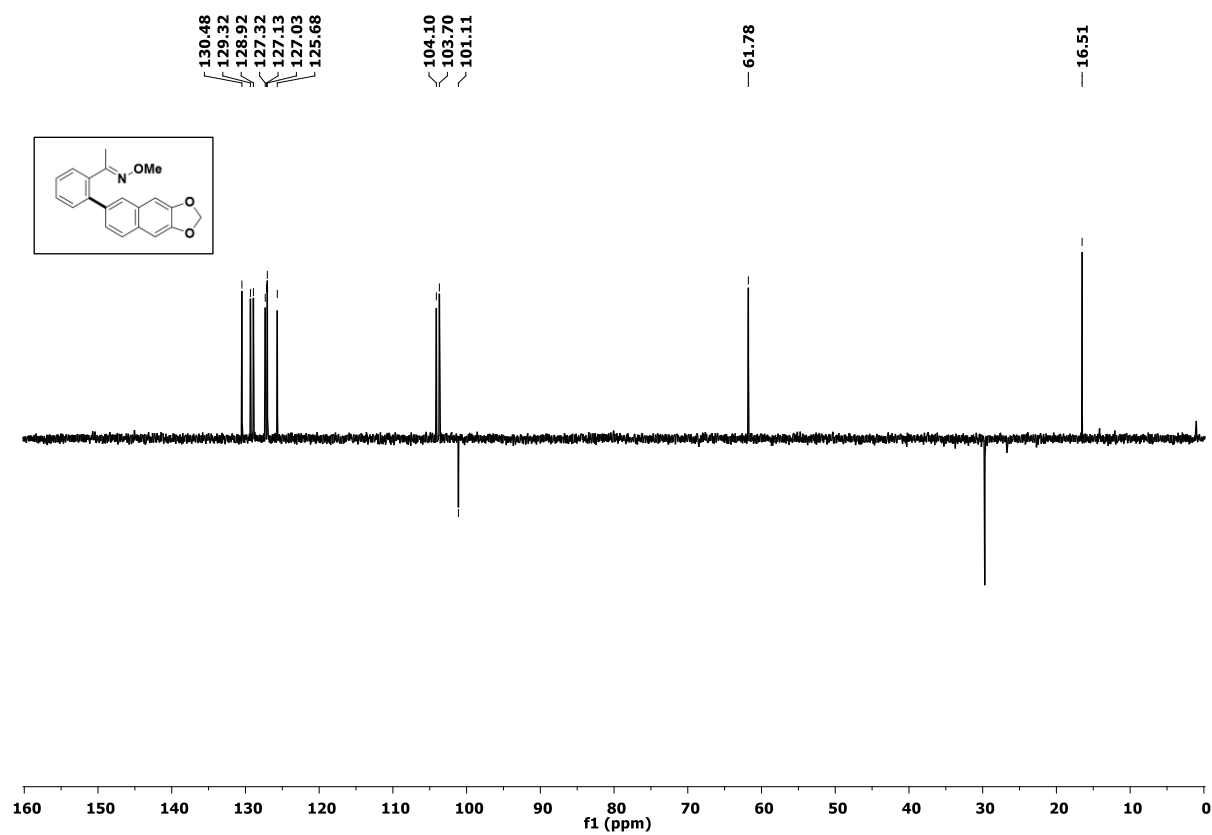



# <sup>1</sup>H and <sup>13</sup>C NMR Spectra of Compound **4a**.

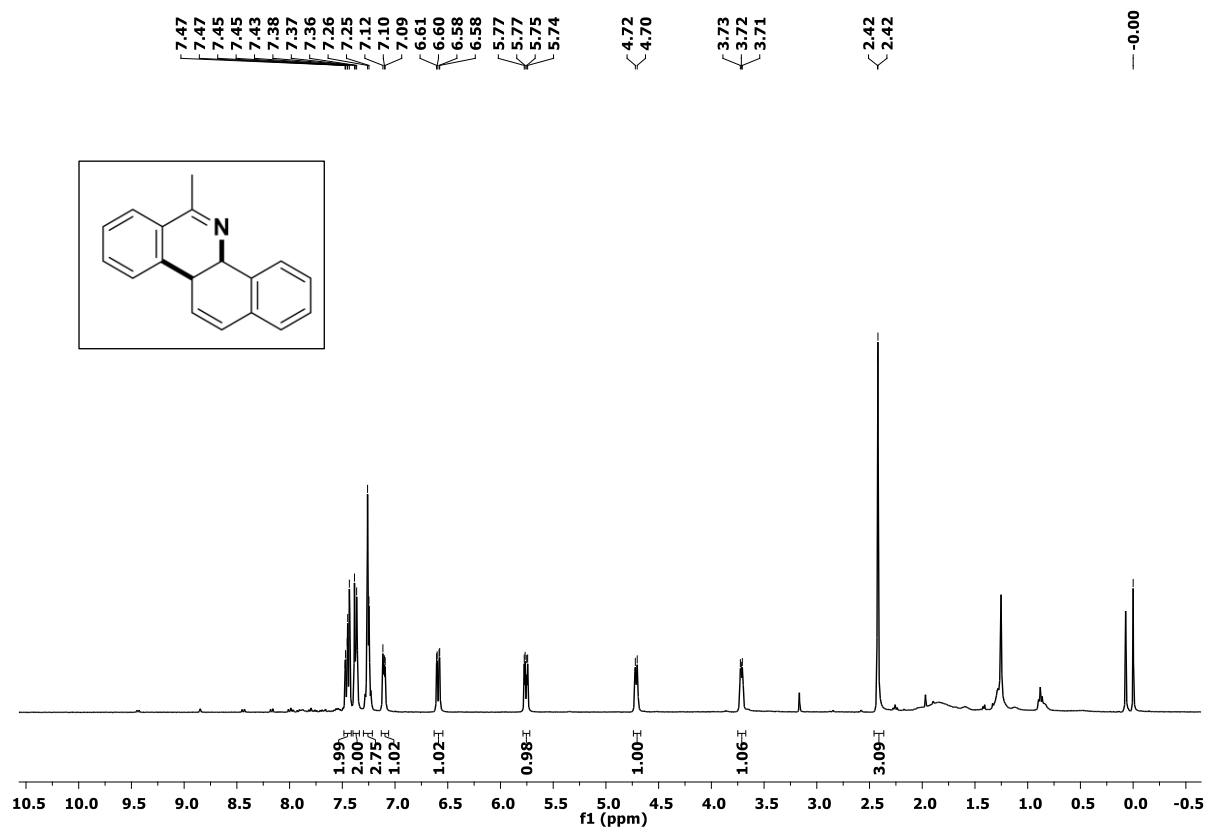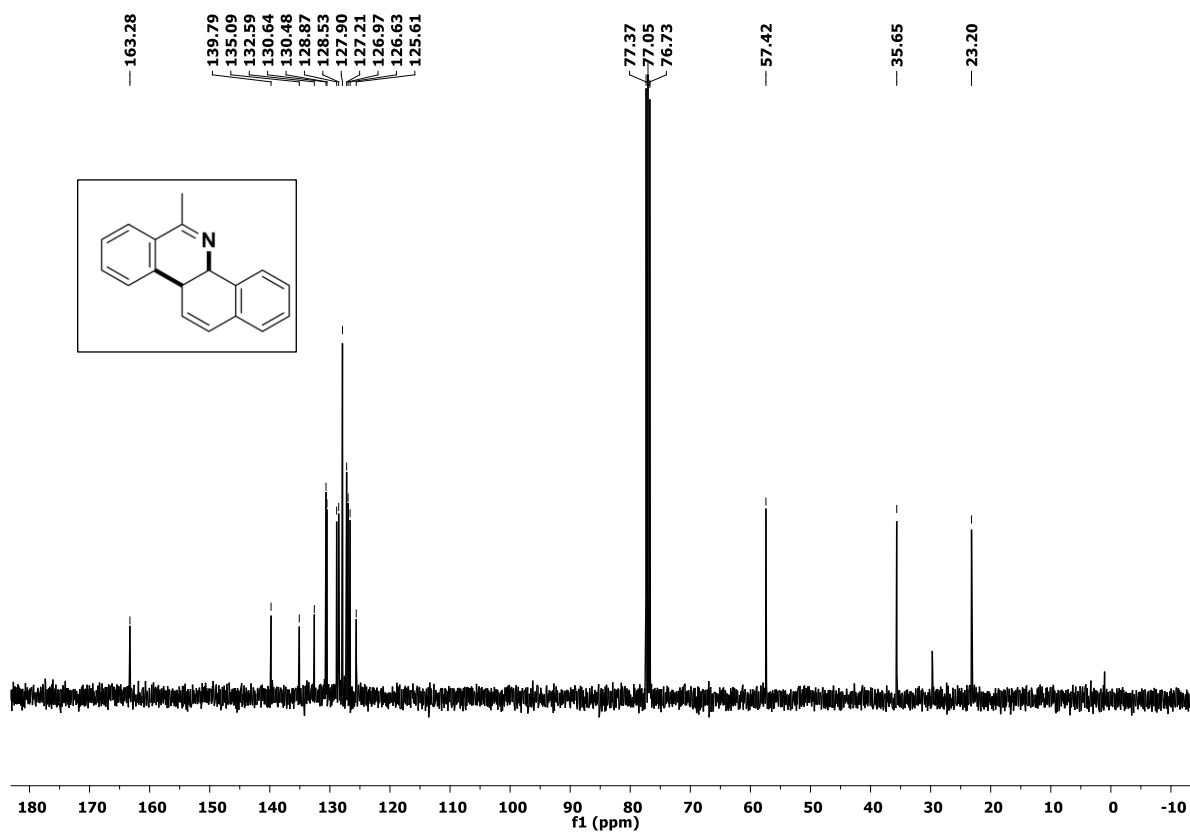



DEPT (135) NMR Spectrum of Compound **4a**.

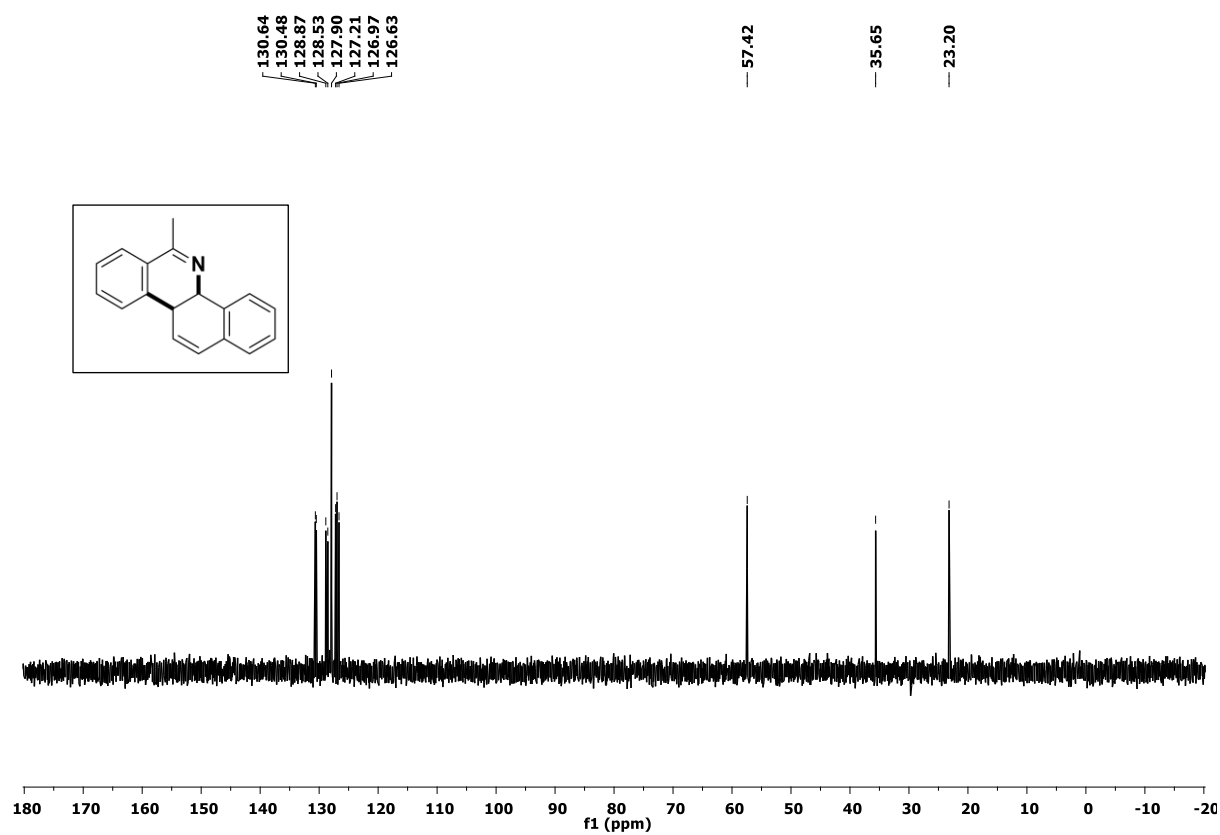



$^1\text{H}$  and  $^{13}\text{C}$  NMR Spectra of Compound **4b**.

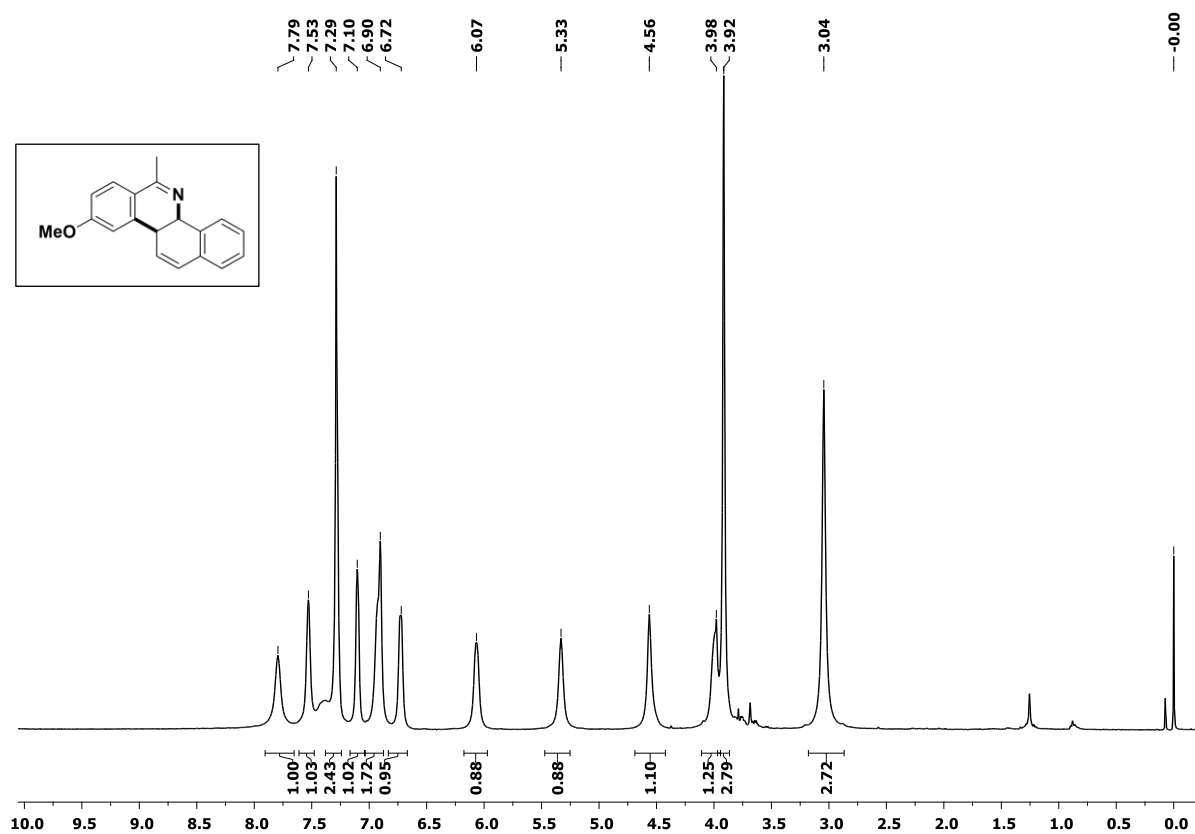

**Fine shimming NMR expended Chemical shift 7.75 ppm to 3.0 ppm for better splitting**

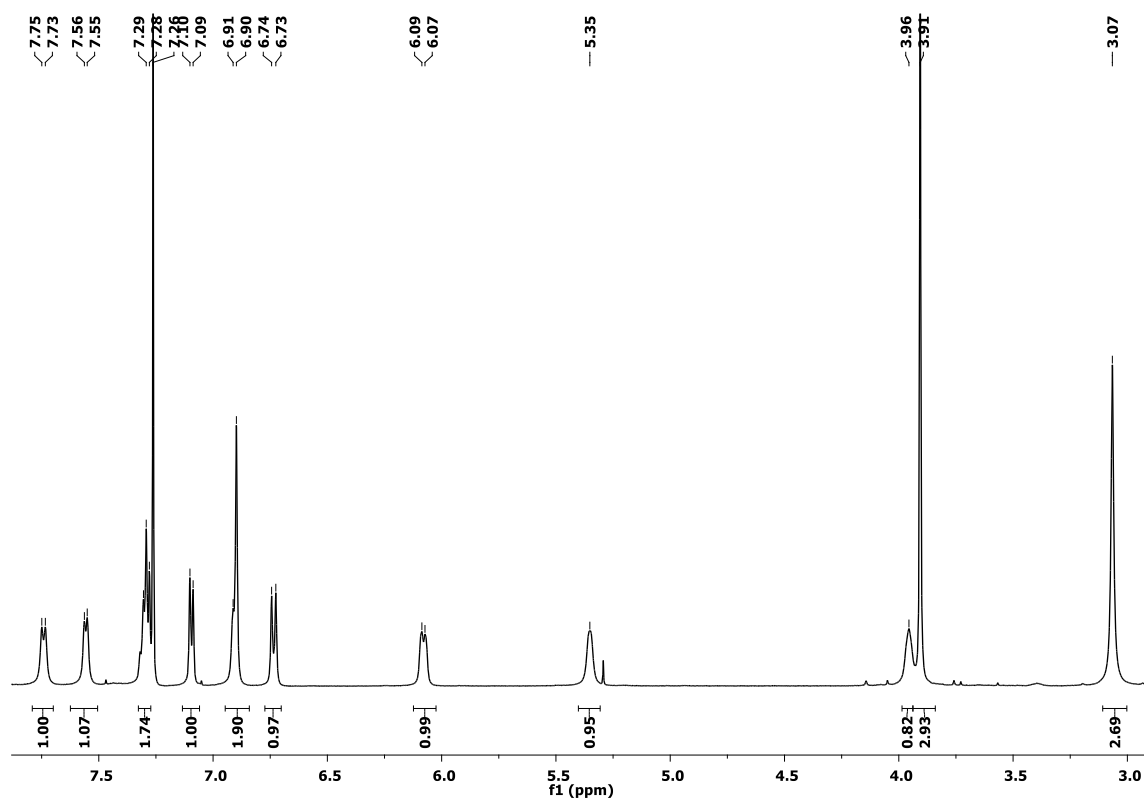



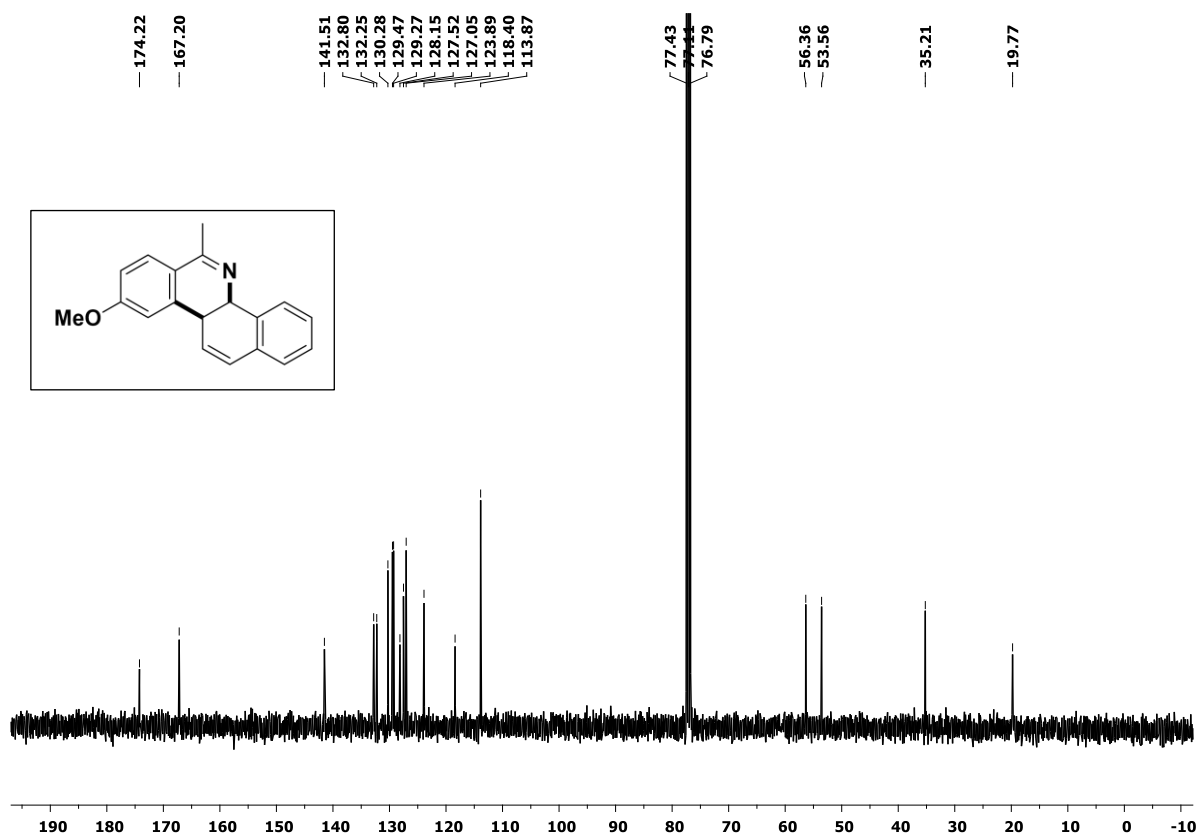

DEPT (135) NMR Spectrum of Compound **4b**.

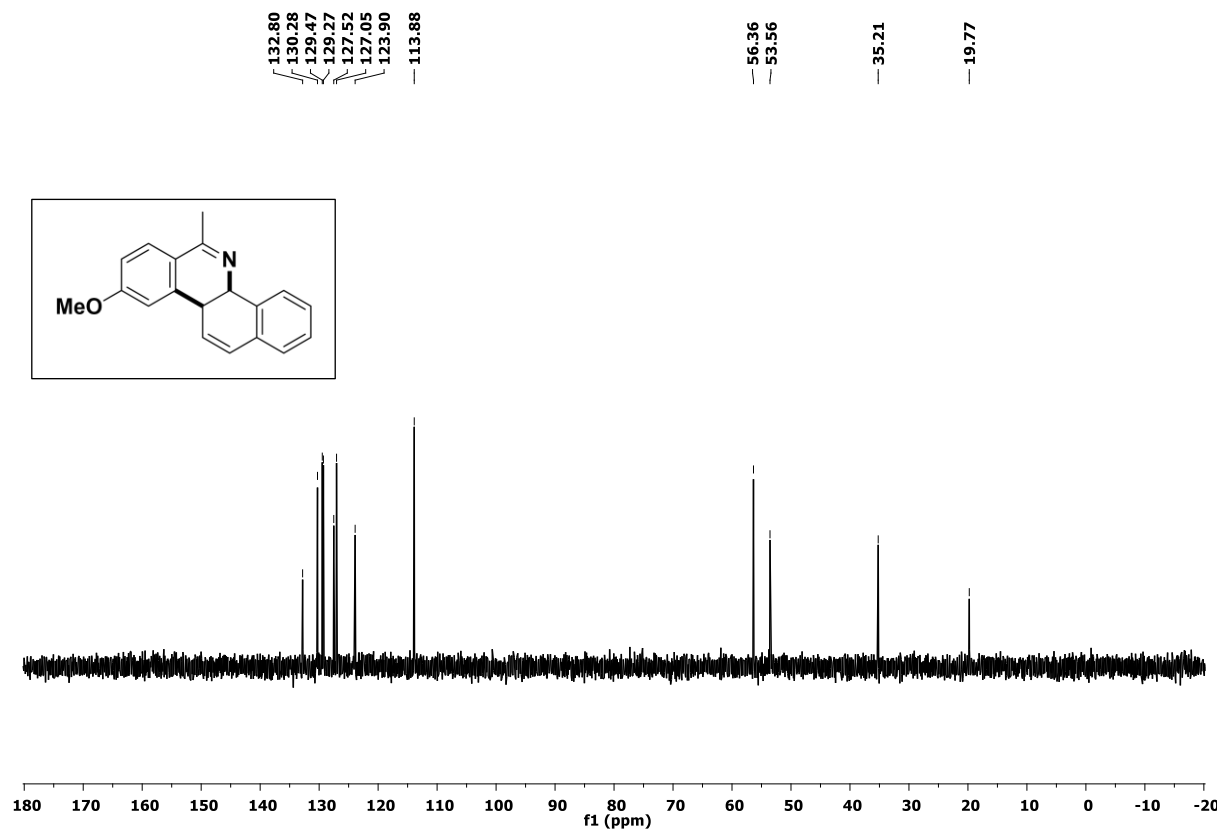



$^1\text{H}$  and  $^{13}\text{C}$  NMR Spectra of Compound **4c**.

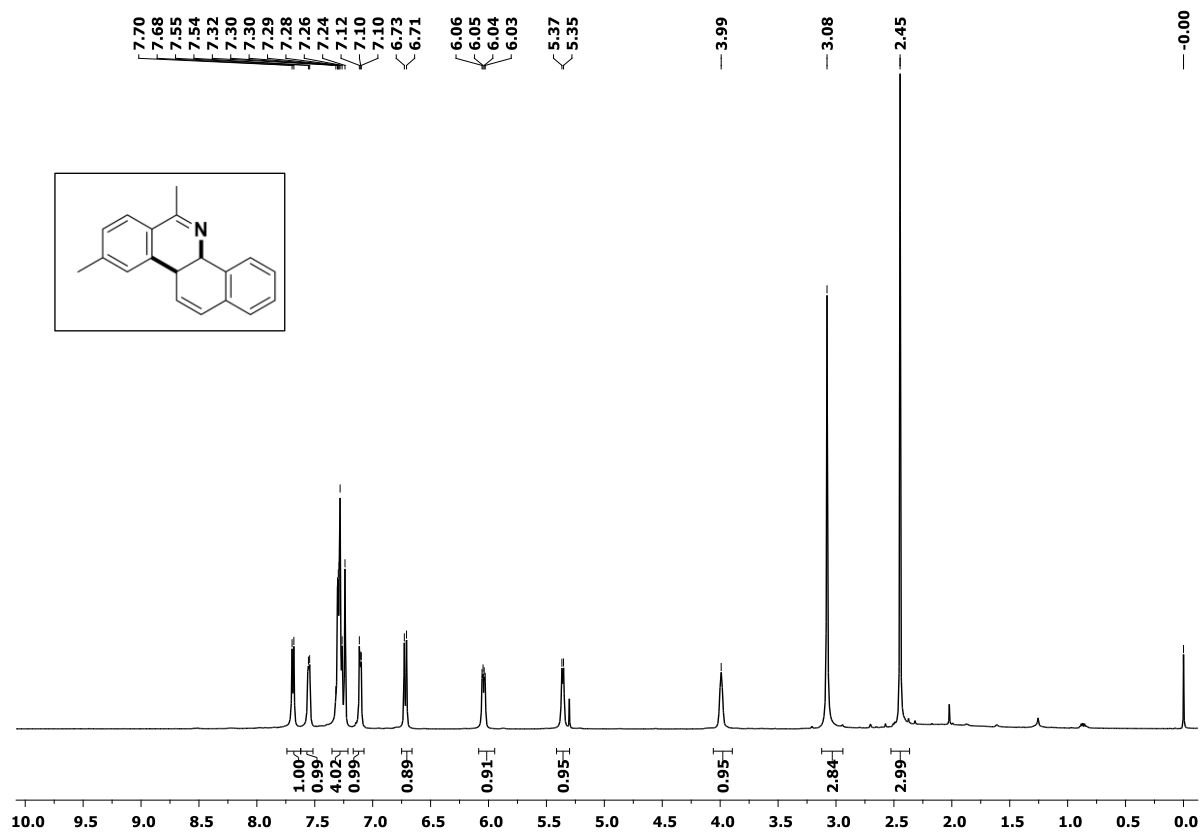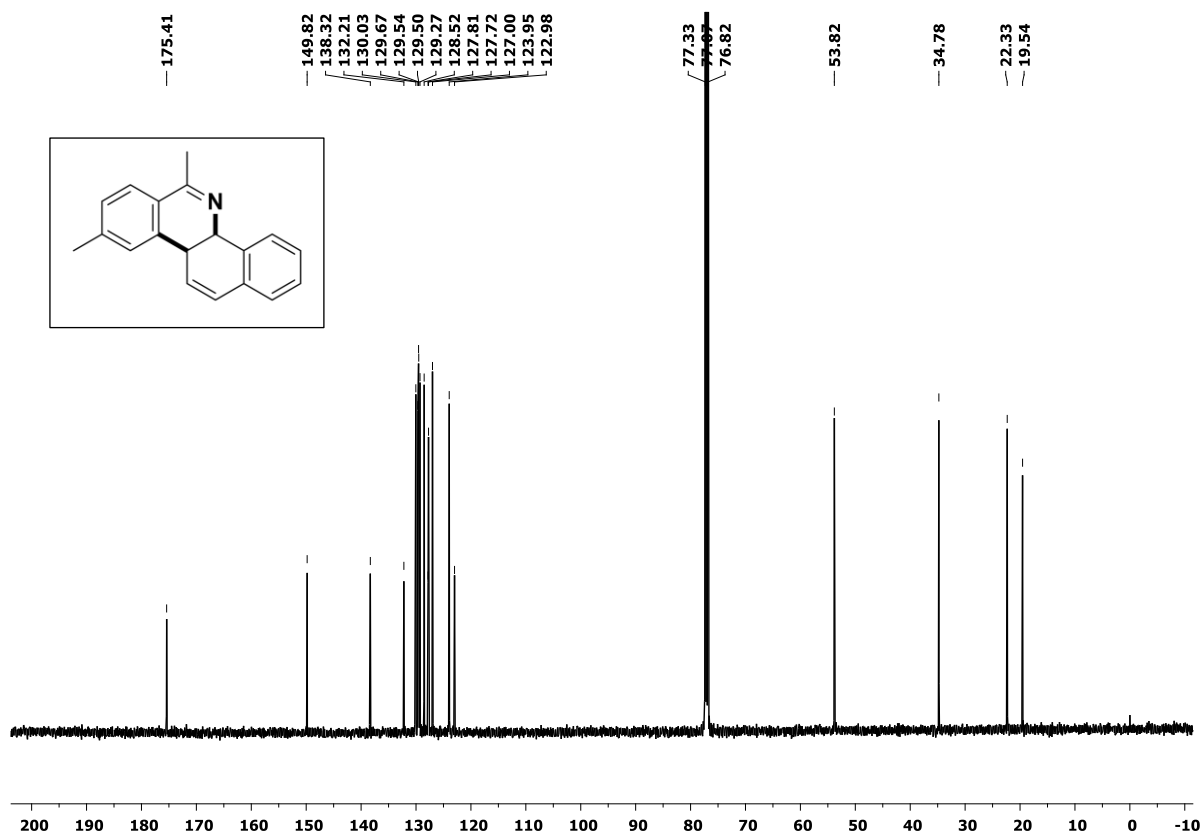



DEPT (135) NMR Spectrum of Compound **4c**.

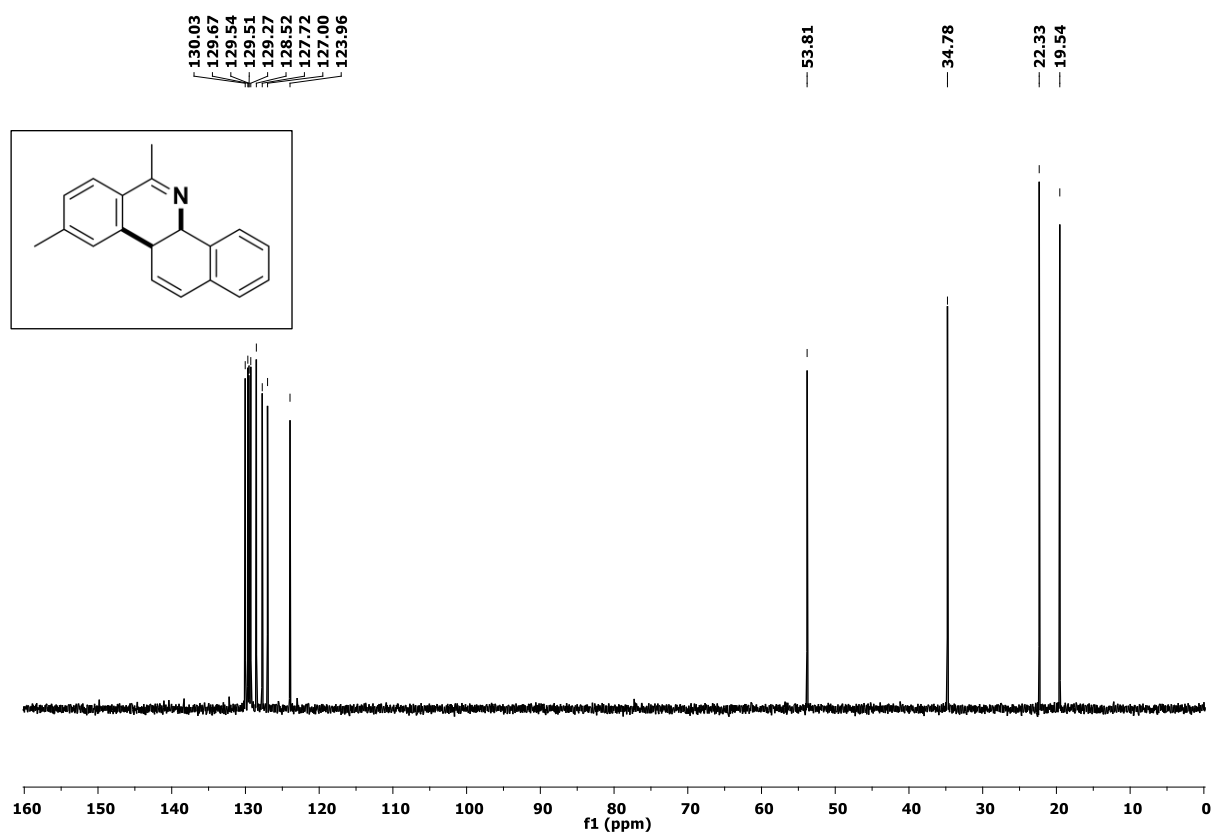



# <sup>1</sup>H and <sup>13</sup>C NMR Spectra of Compound **4d**.

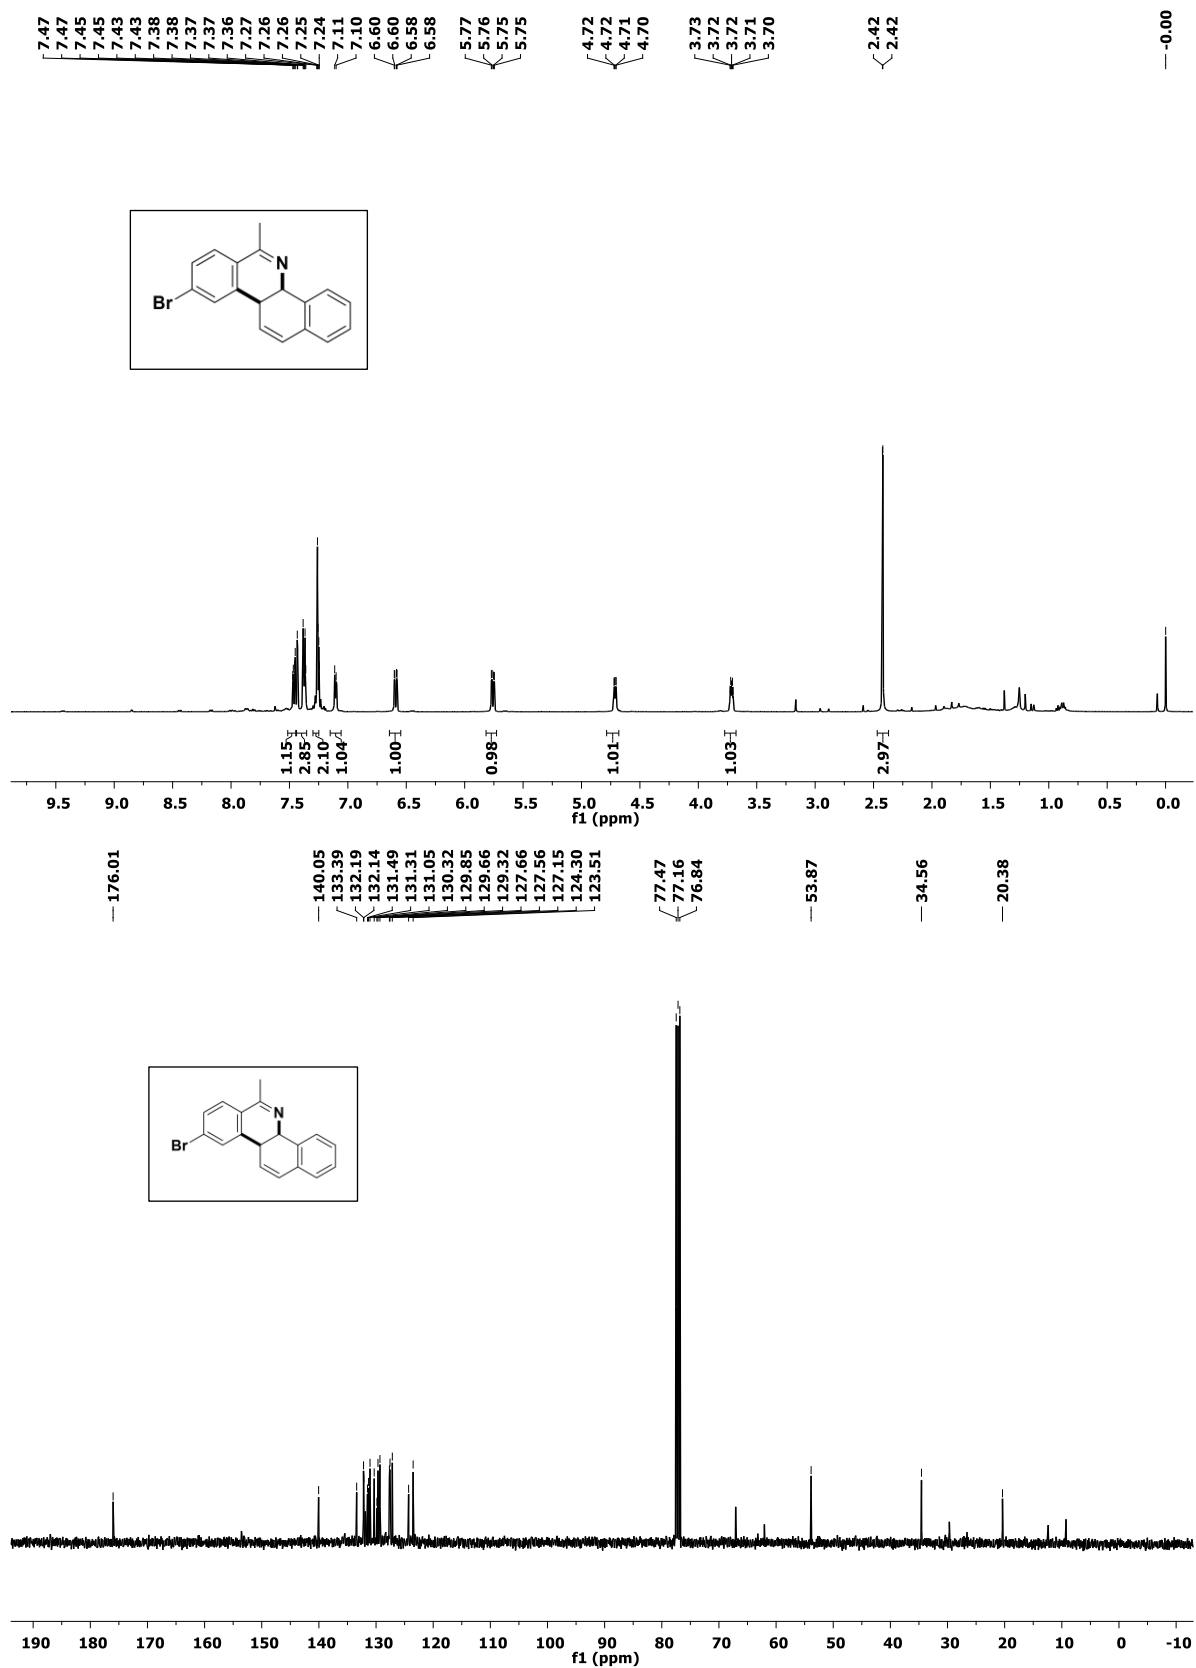



DEPT (135) NMR Spectrum of Compound **4d**.

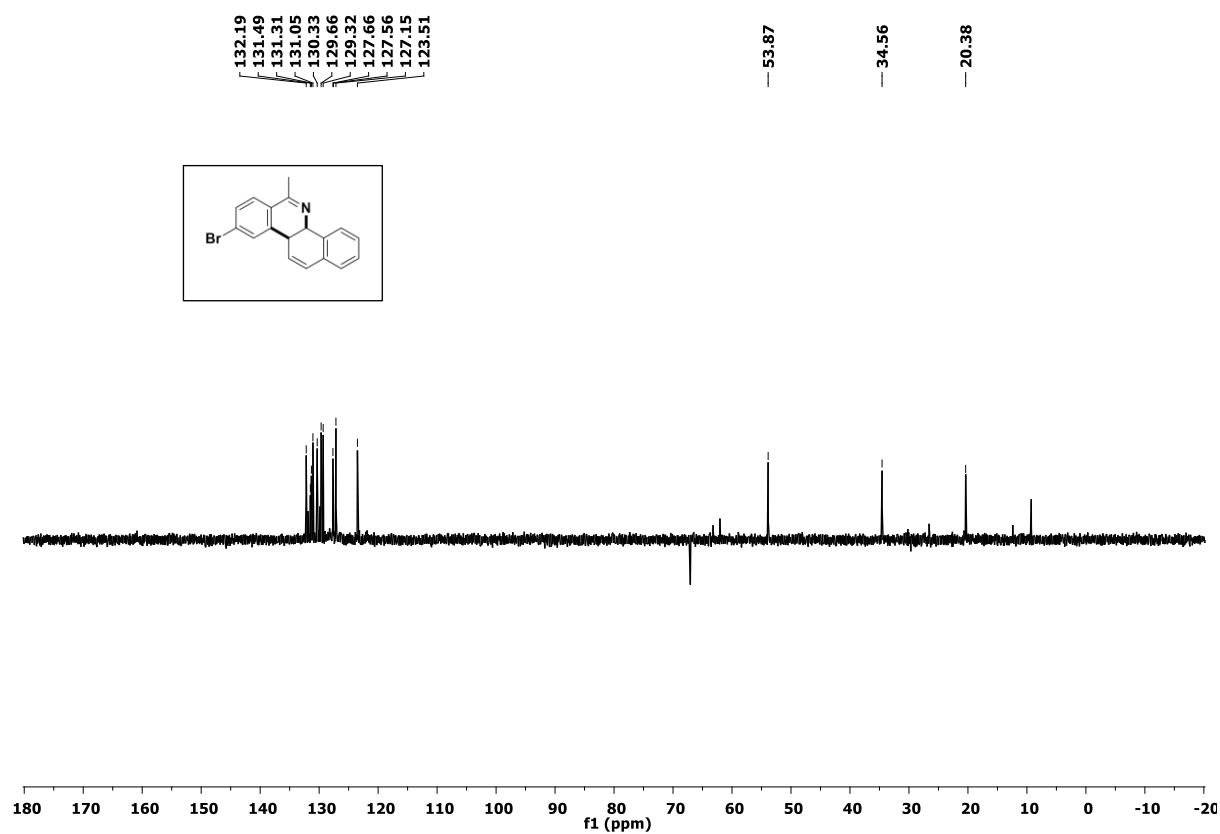



$^1\text{H}$  and  $^{13}\text{C}$  NMR Spectra of Compound **4e**.

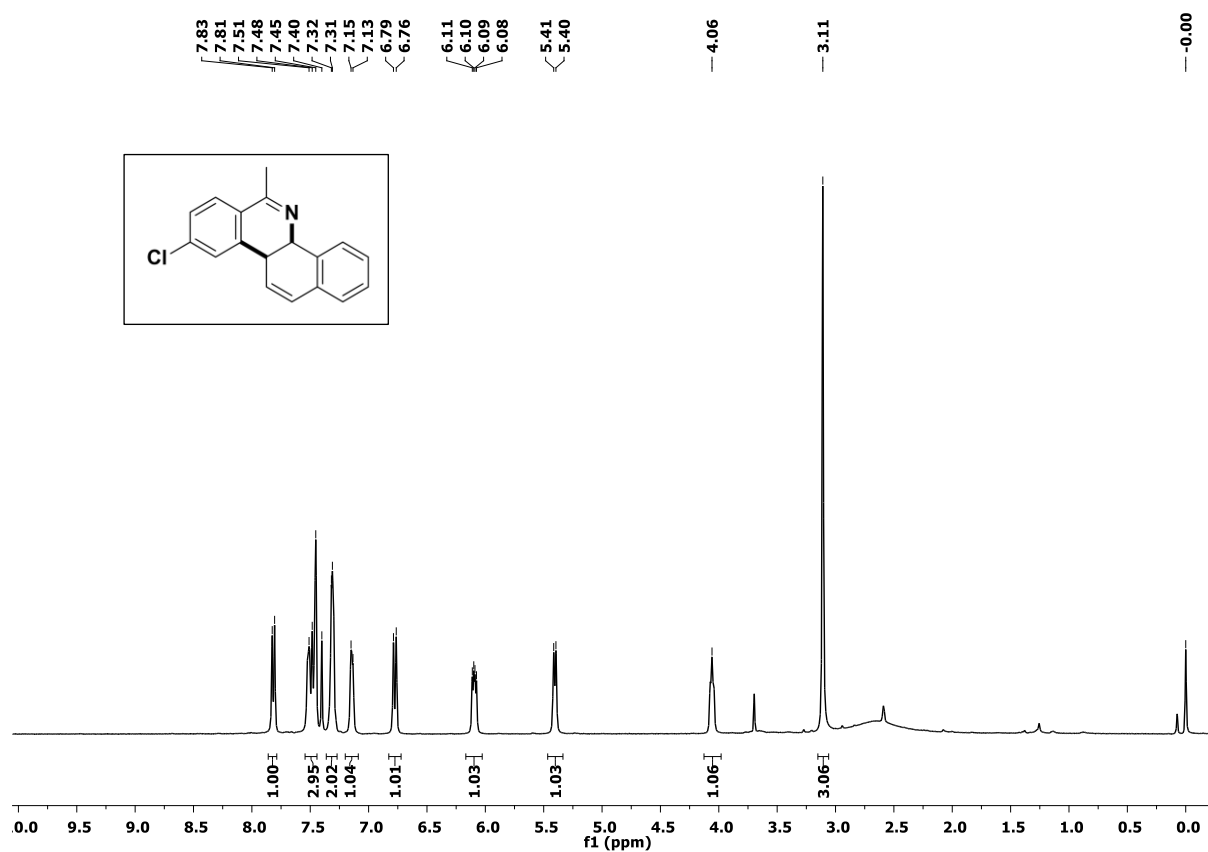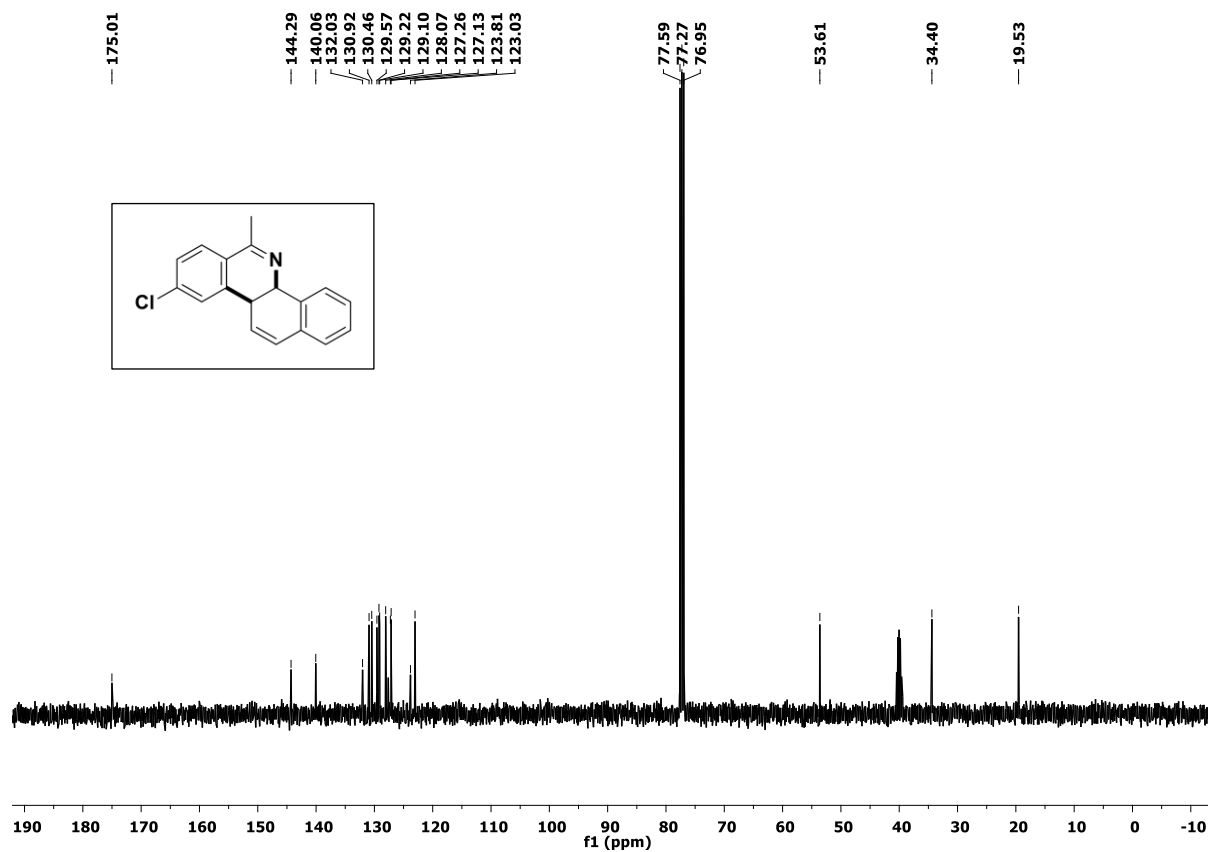



$^1\text{H}$  and  $^{13}\text{C}$  NMR Spectra of Compound **4f**.

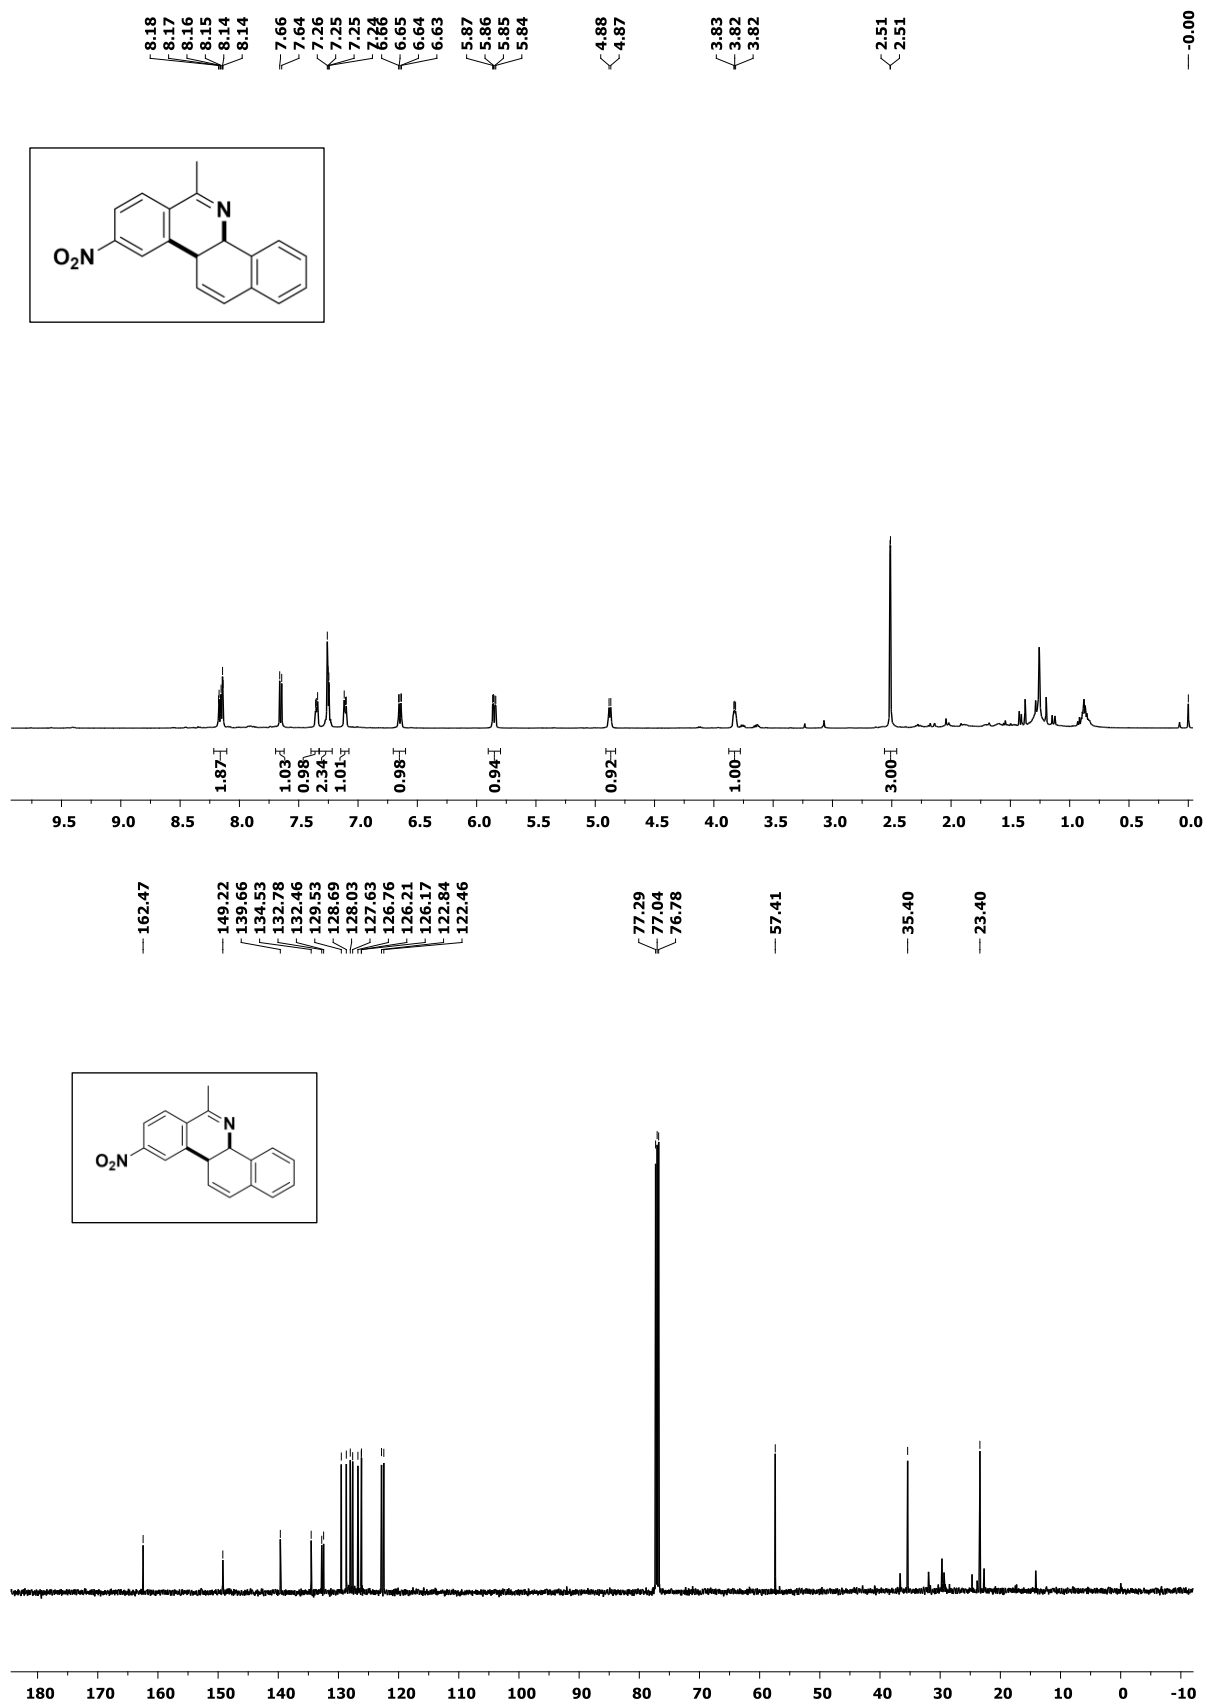



DEPT (135) NMR Spectrum of Compound **4f**.

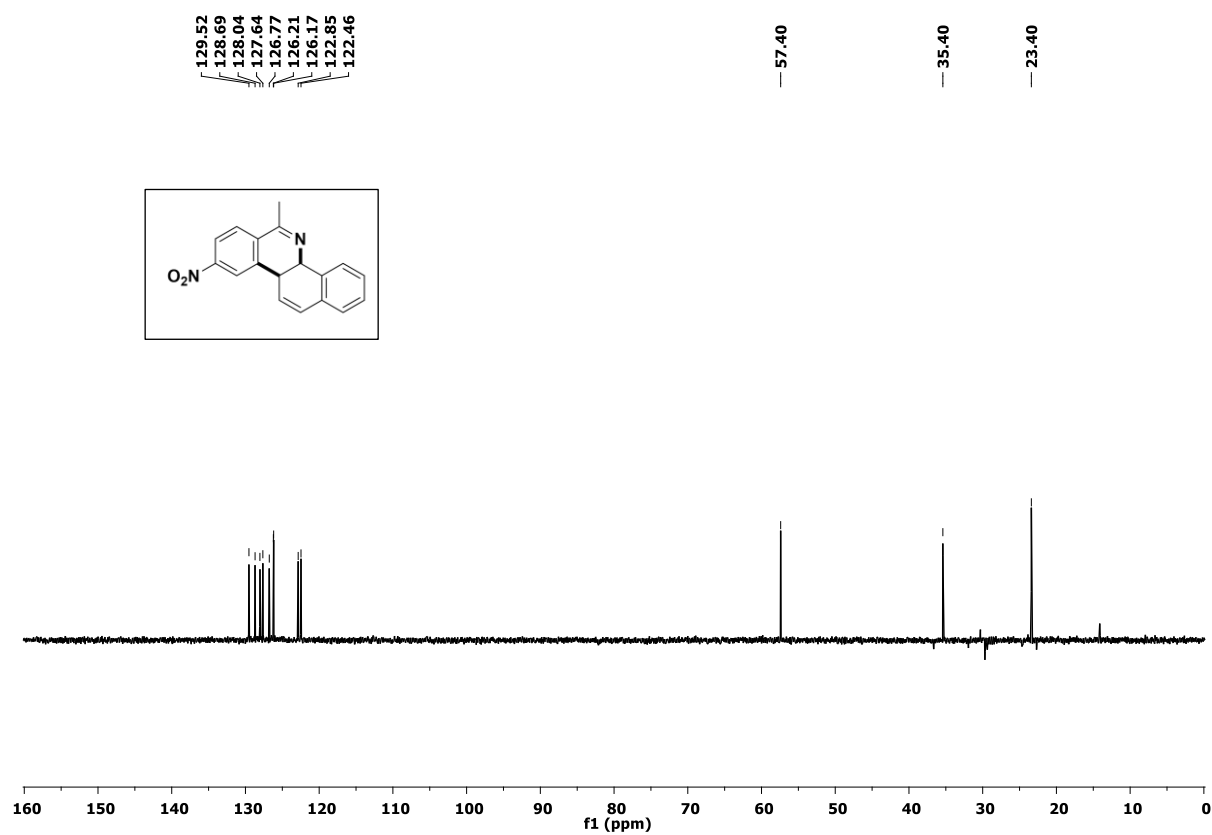



$^1\text{H}$  and  $^{13}\text{C}$  NMR Spectra of Compound **4g**.

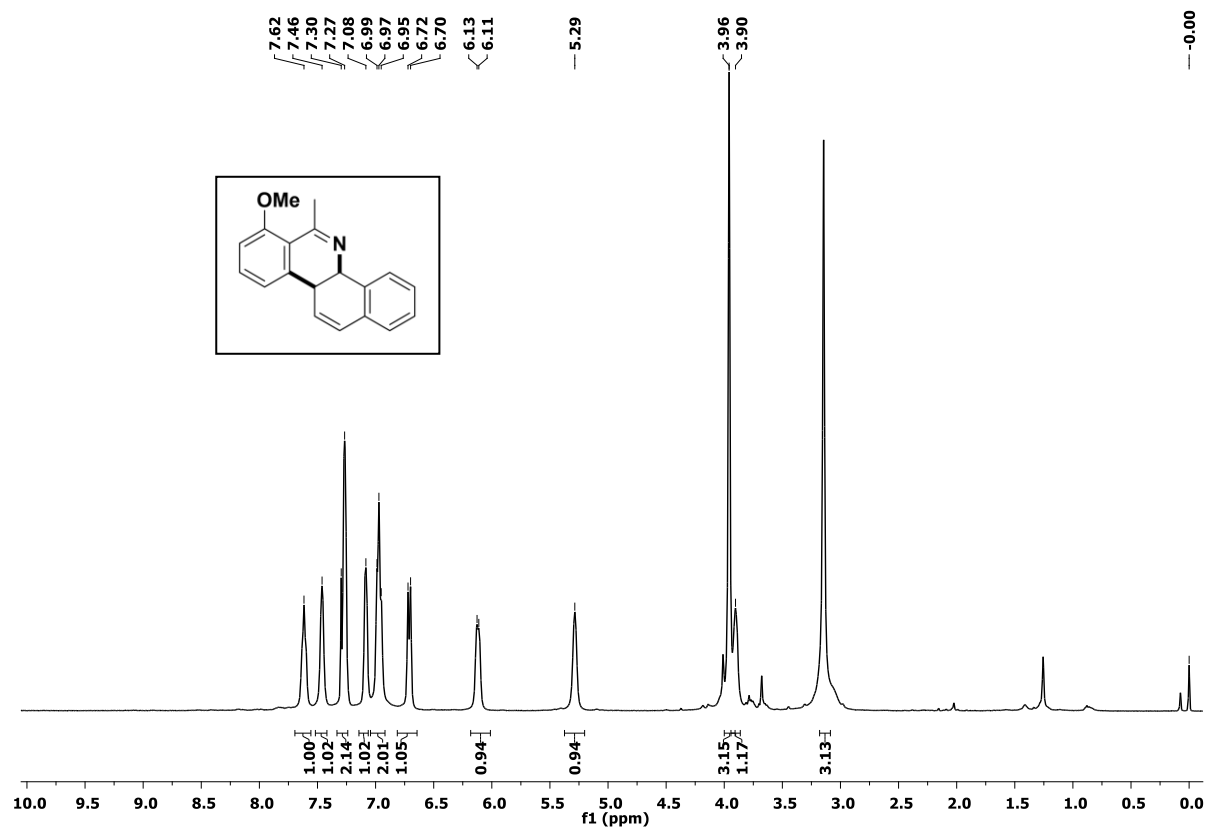

**Fine shimming NMR expended Chemical shift 7.6 ppm to 3.0 ppm for better splitting**

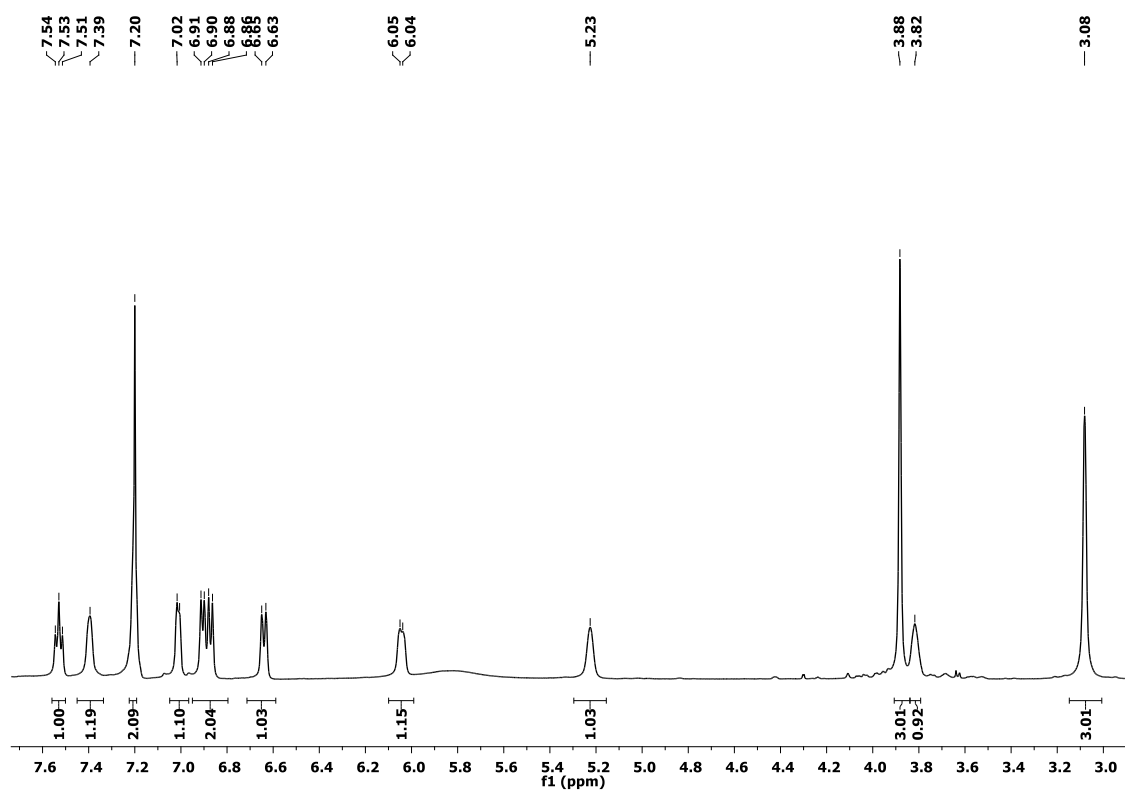



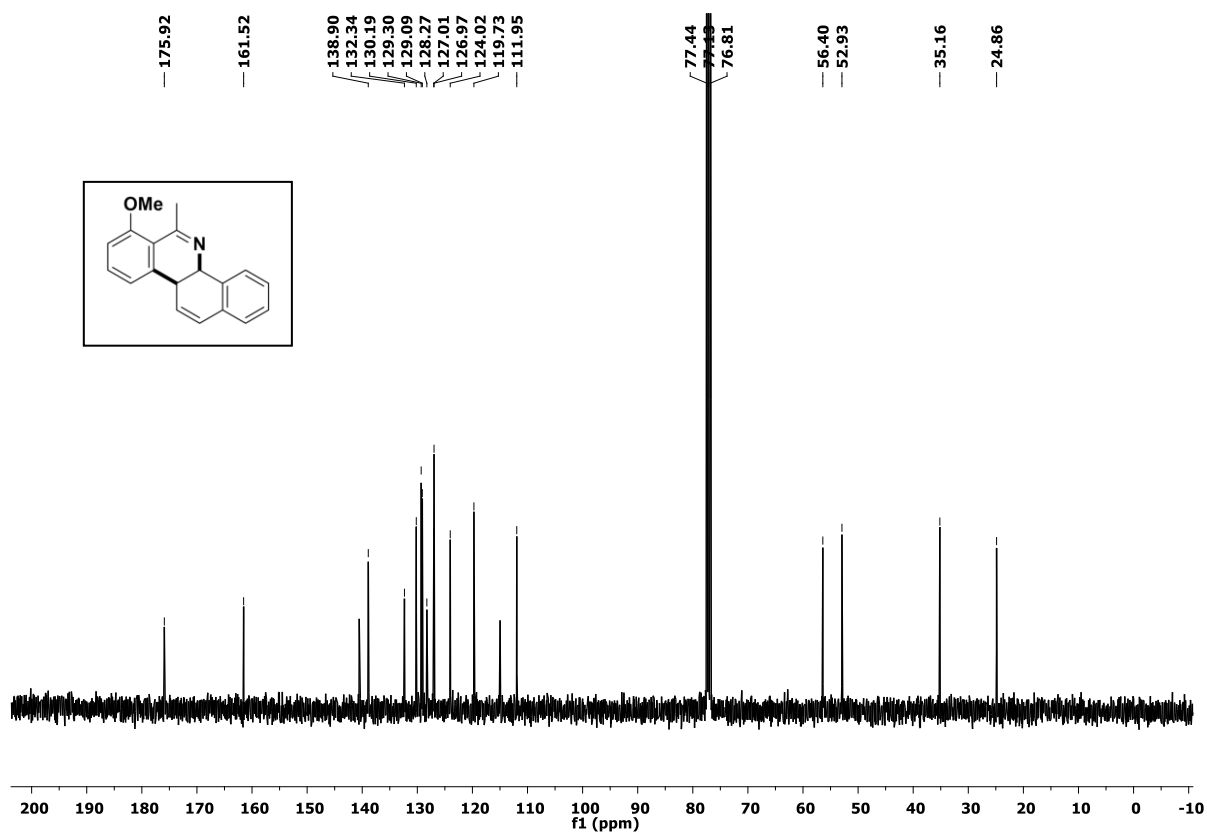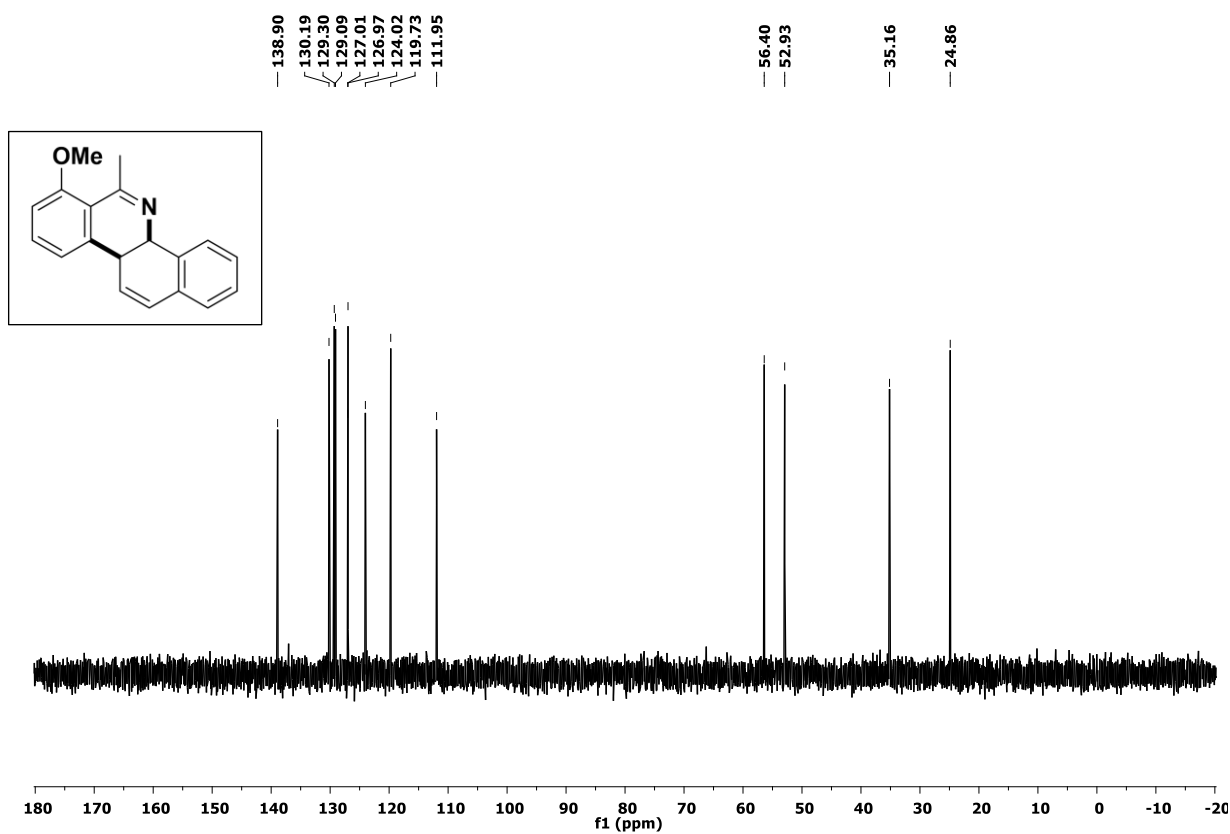



$^1\text{H}$  and  $^{13}\text{C}$  NMR Spectra of Compound **4h**.

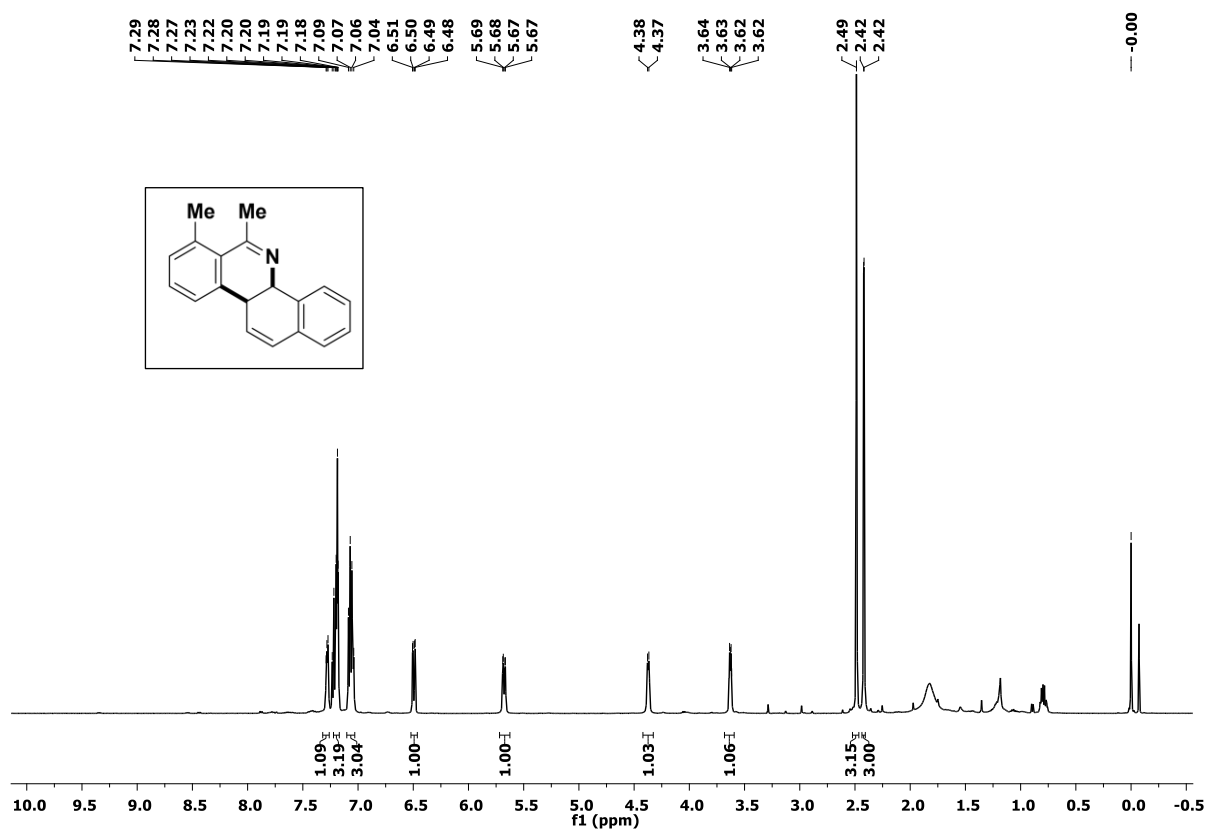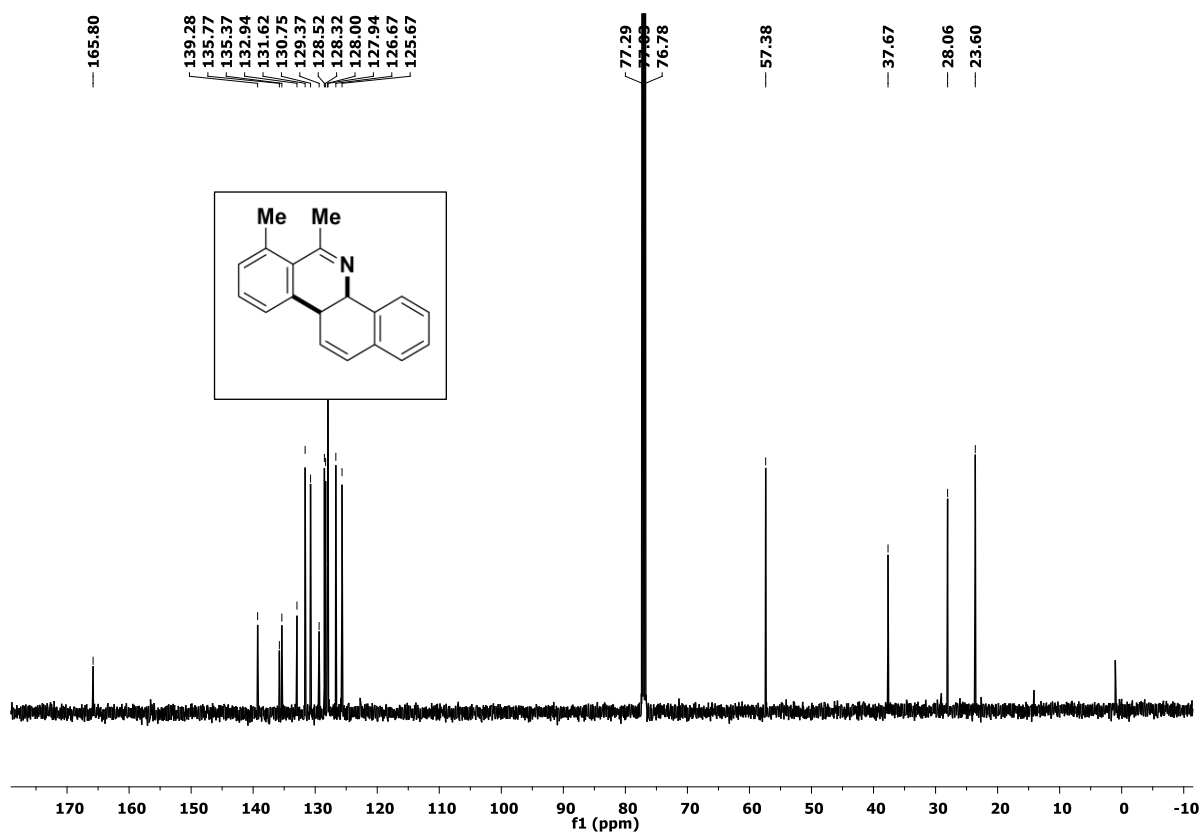



DEPT (135) NMR Spectrum of Compound **4h**.

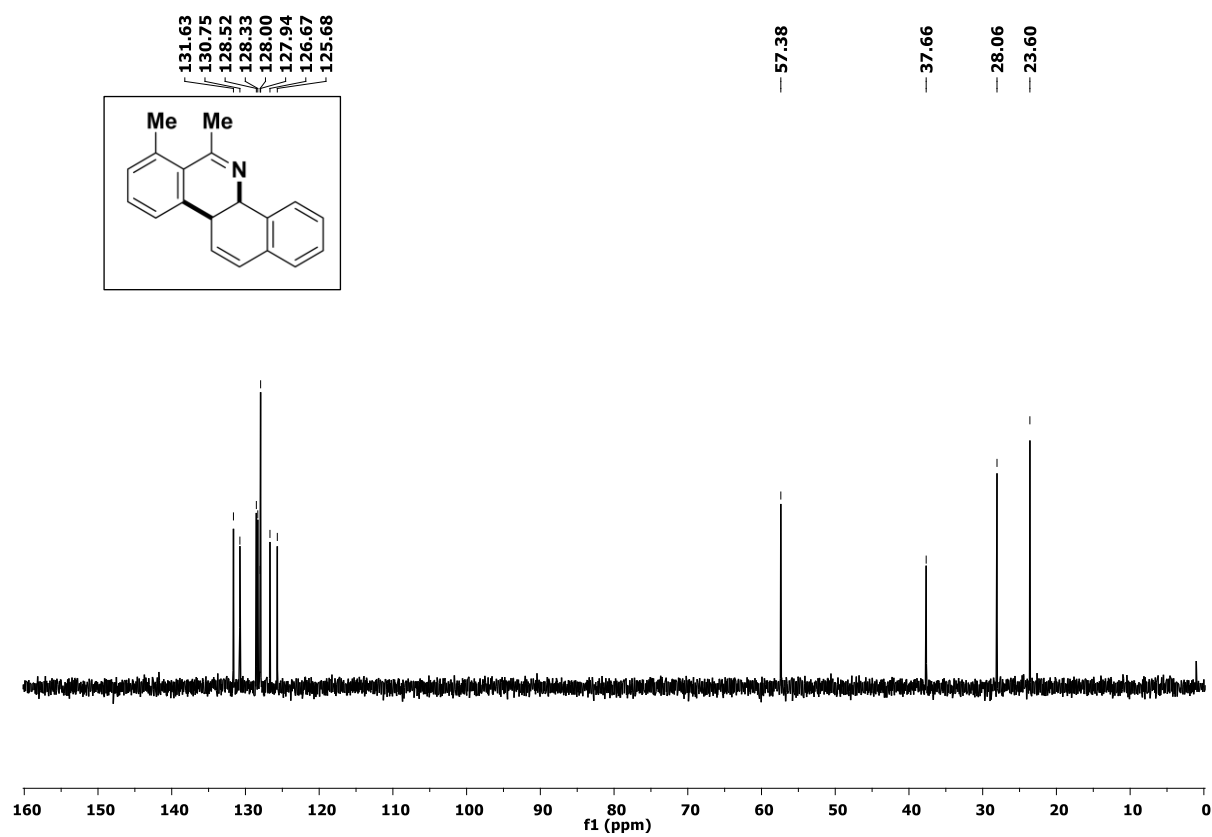



# <sup>1</sup>H and <sup>13</sup>C NMR Spectra of Compound **4i**.

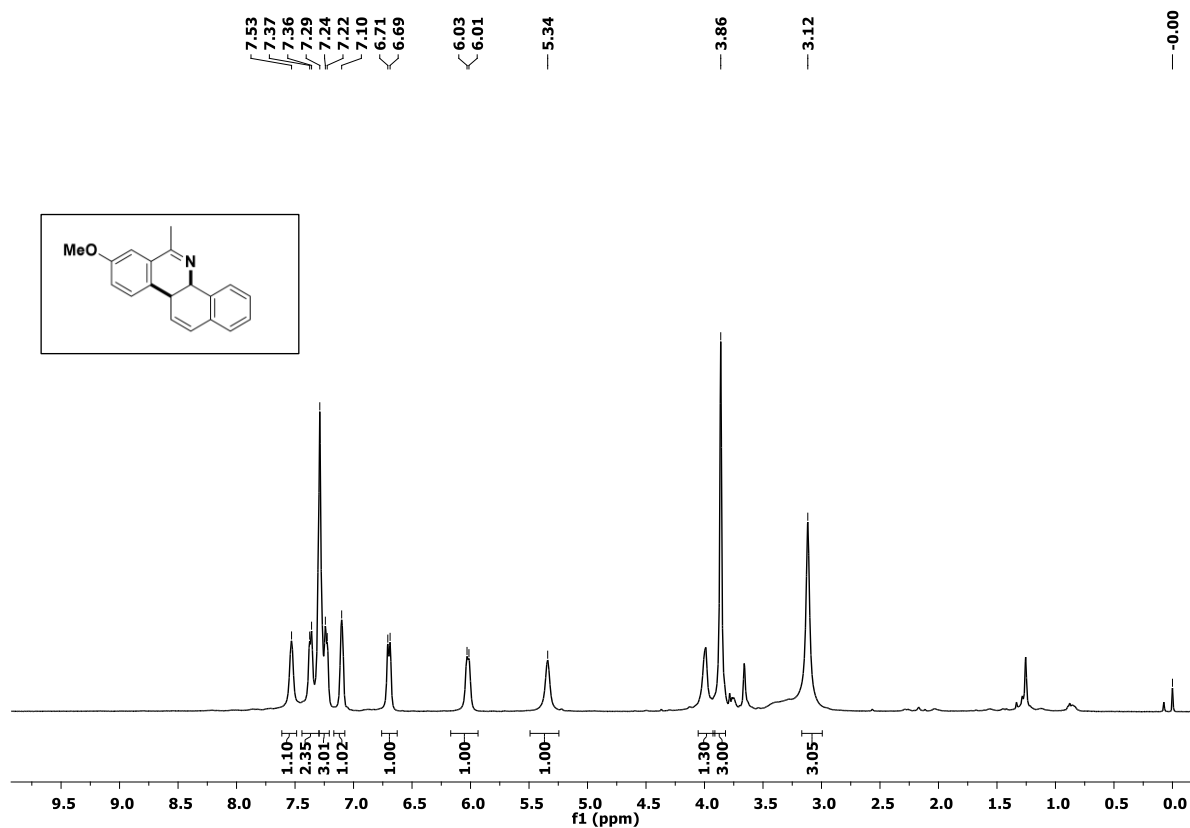

**Fine shimming NMR expanded: Chemical shift 7.54 ppm to 3.0 ppm for better splitting**

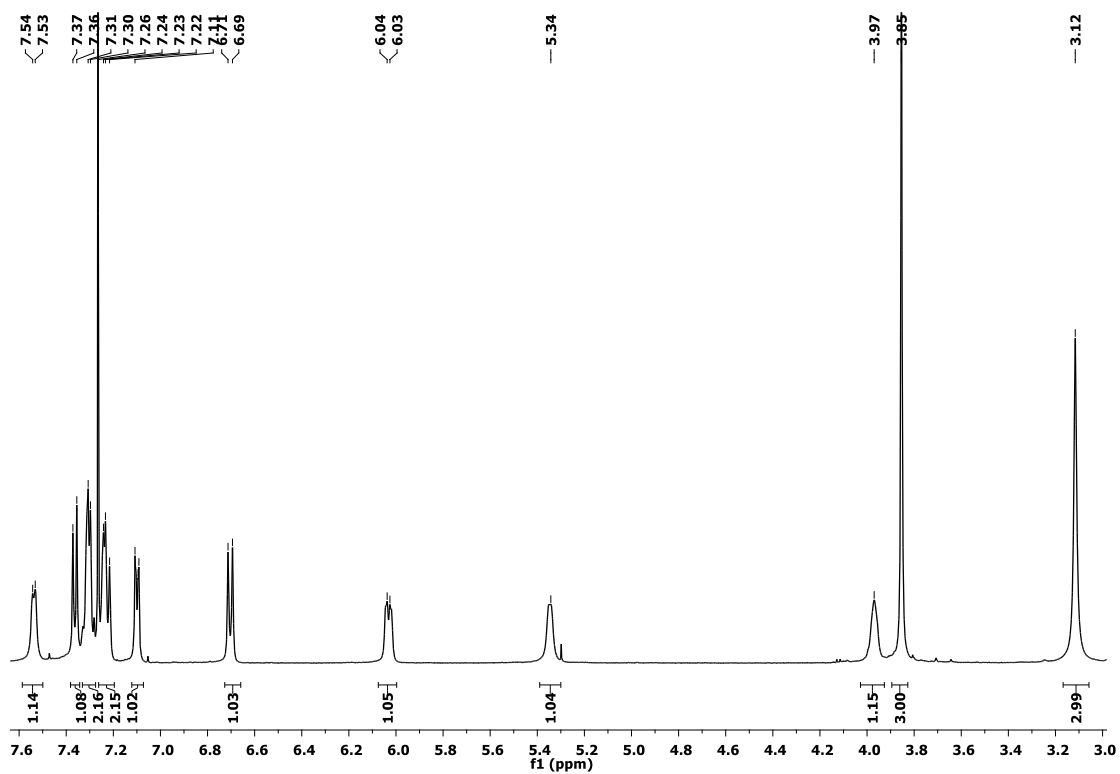



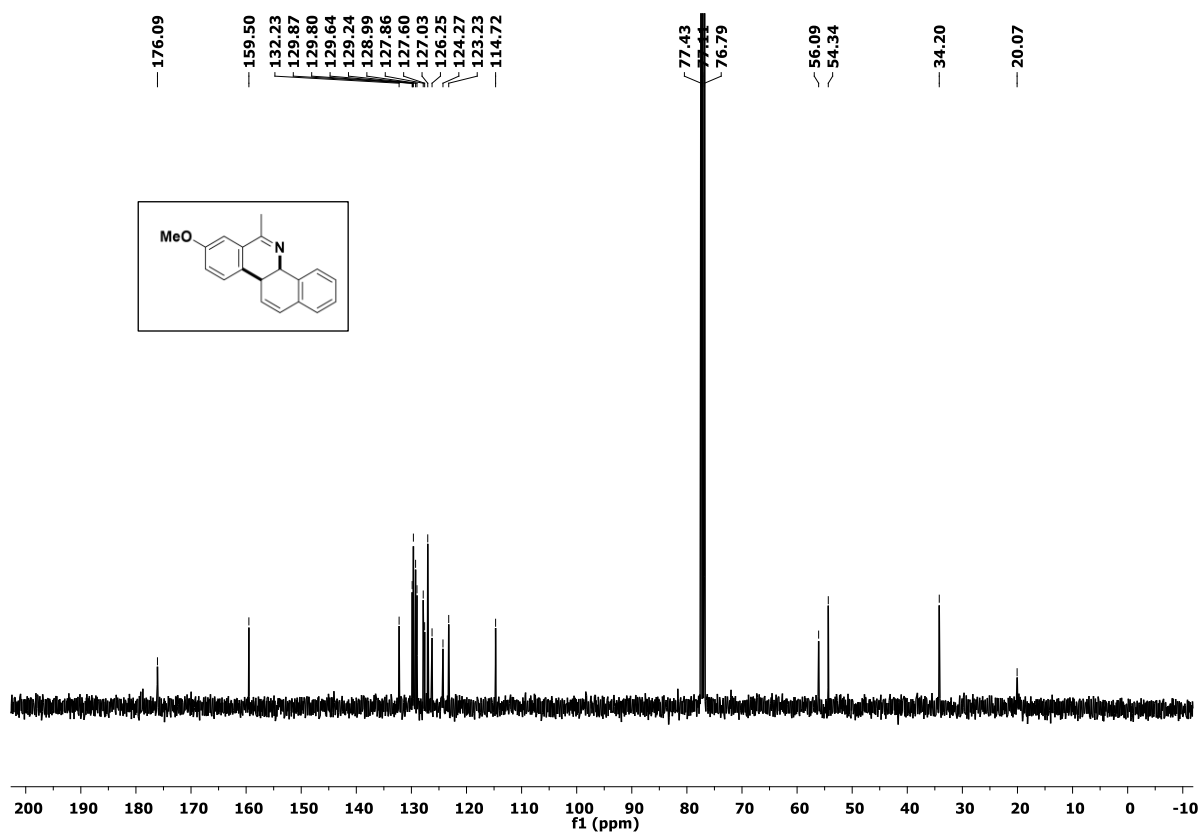

DEPT (135) NMR Spectrum of Compound 4i.

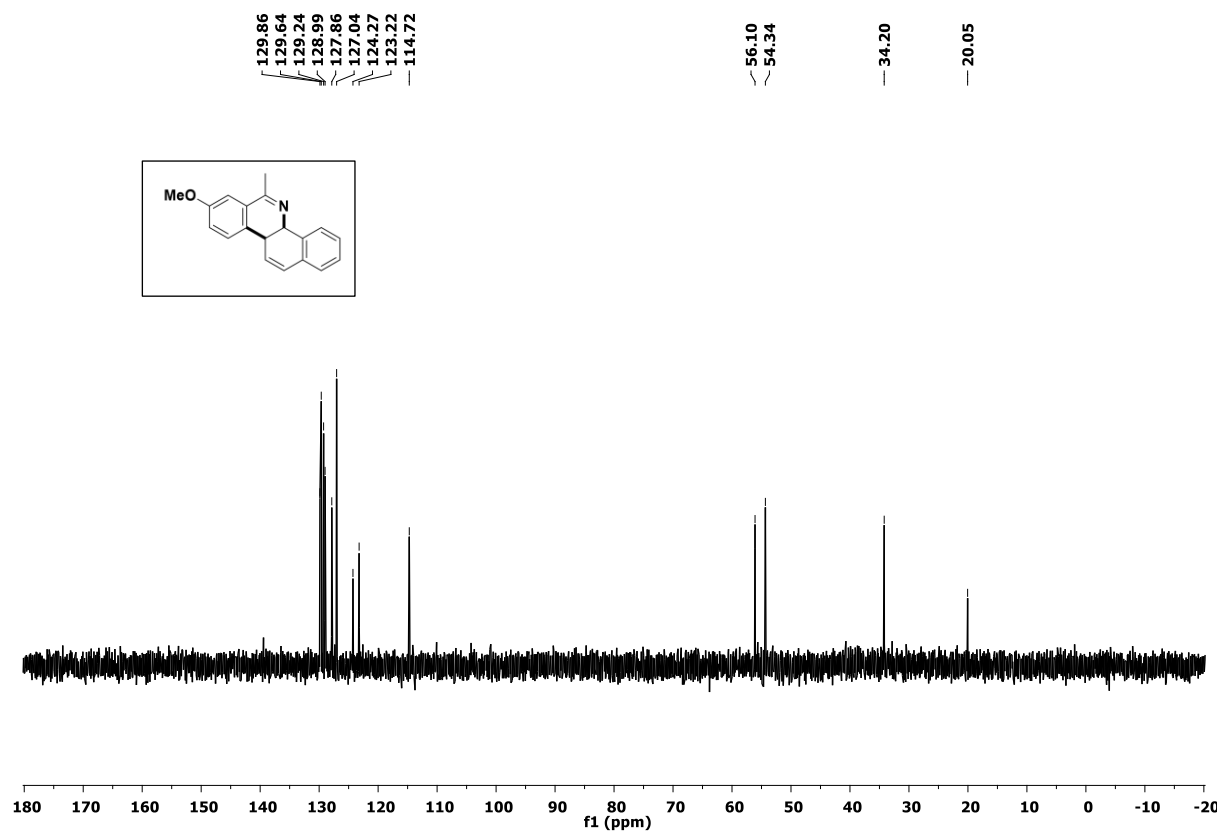



$^1\text{H}$  and  $^{13}\text{C}$  NMR Spectra of Compound **4j**.

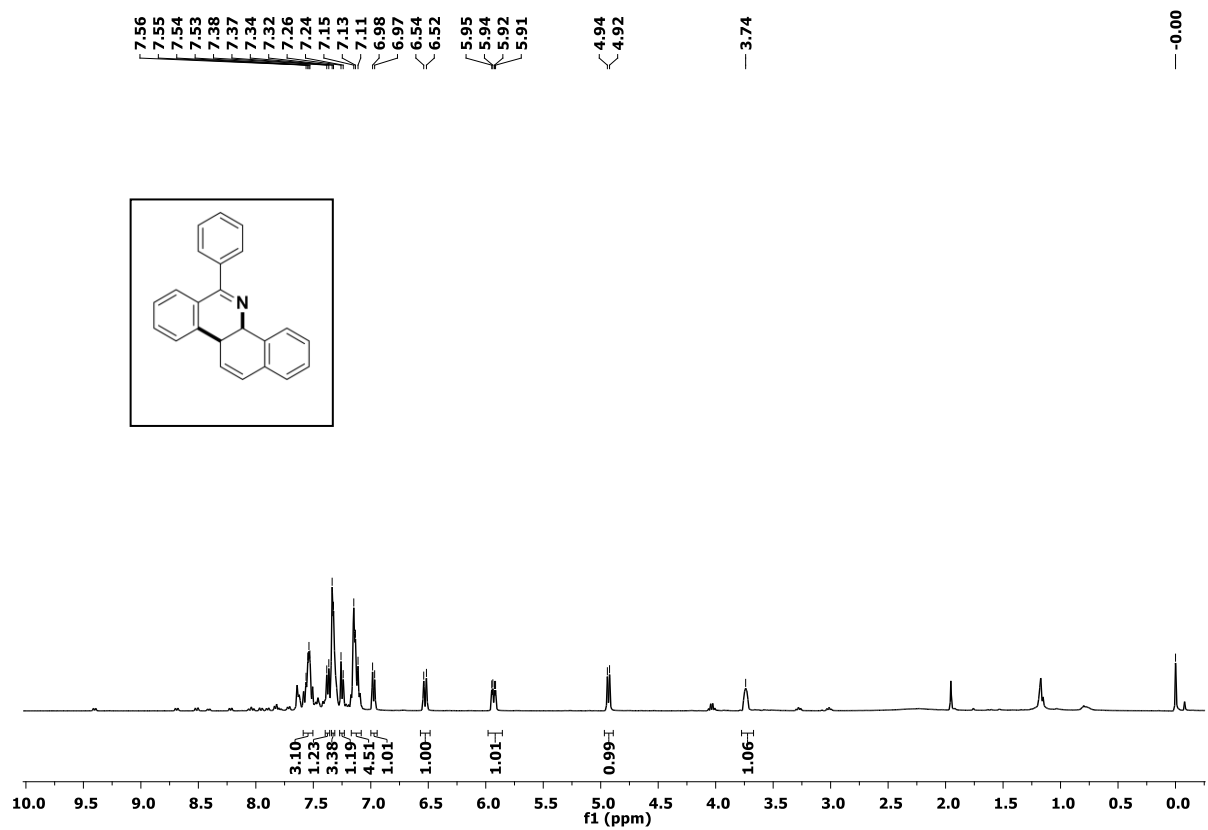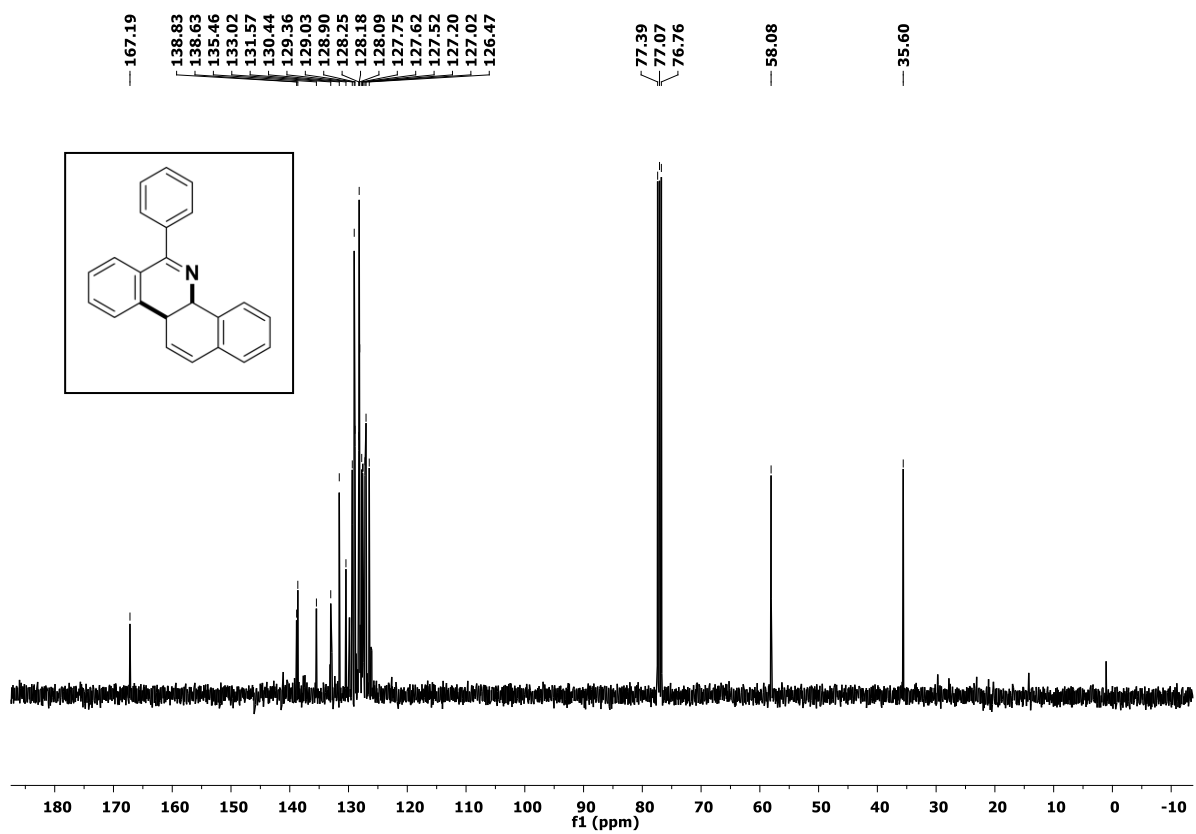



DEPT (135) NMR Spectrum of Compound **4j**.

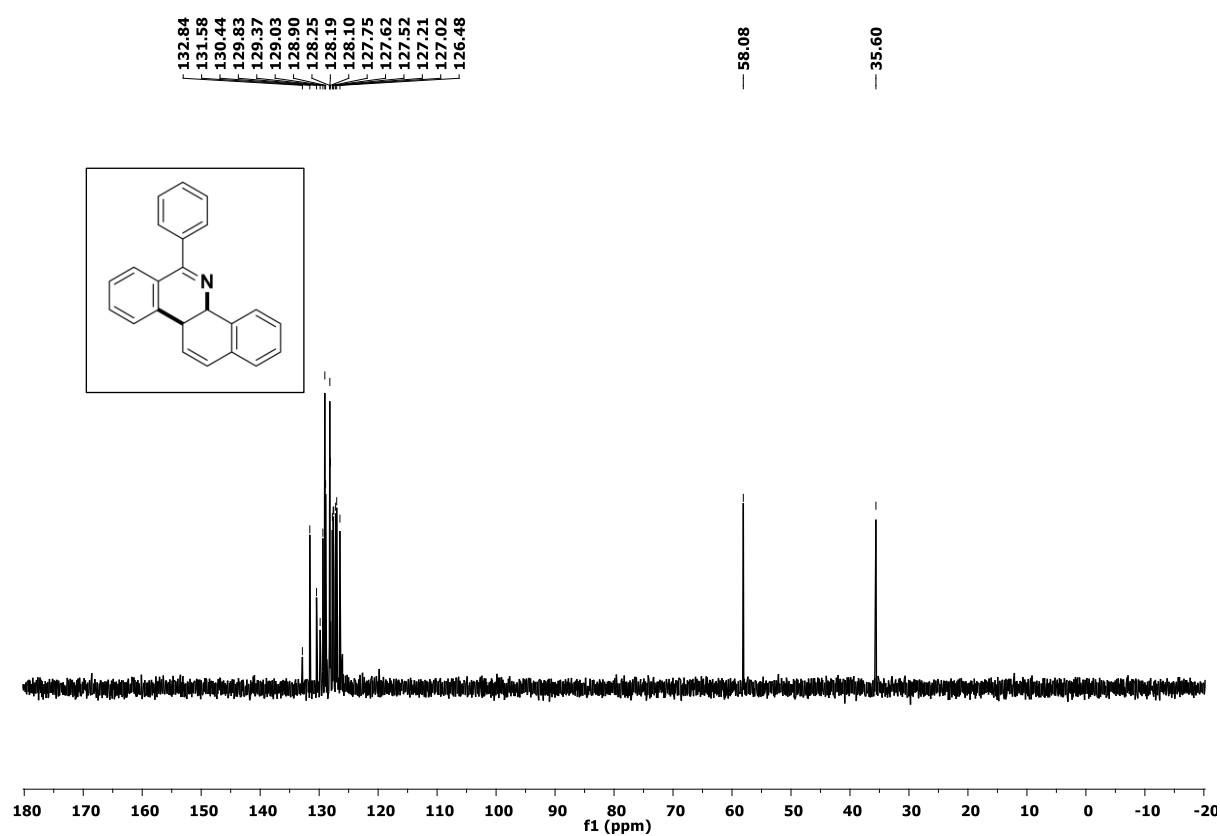



$^1\text{H}$  and  $^{13}\text{C}$  NMR Spectra of Compound **5a**.

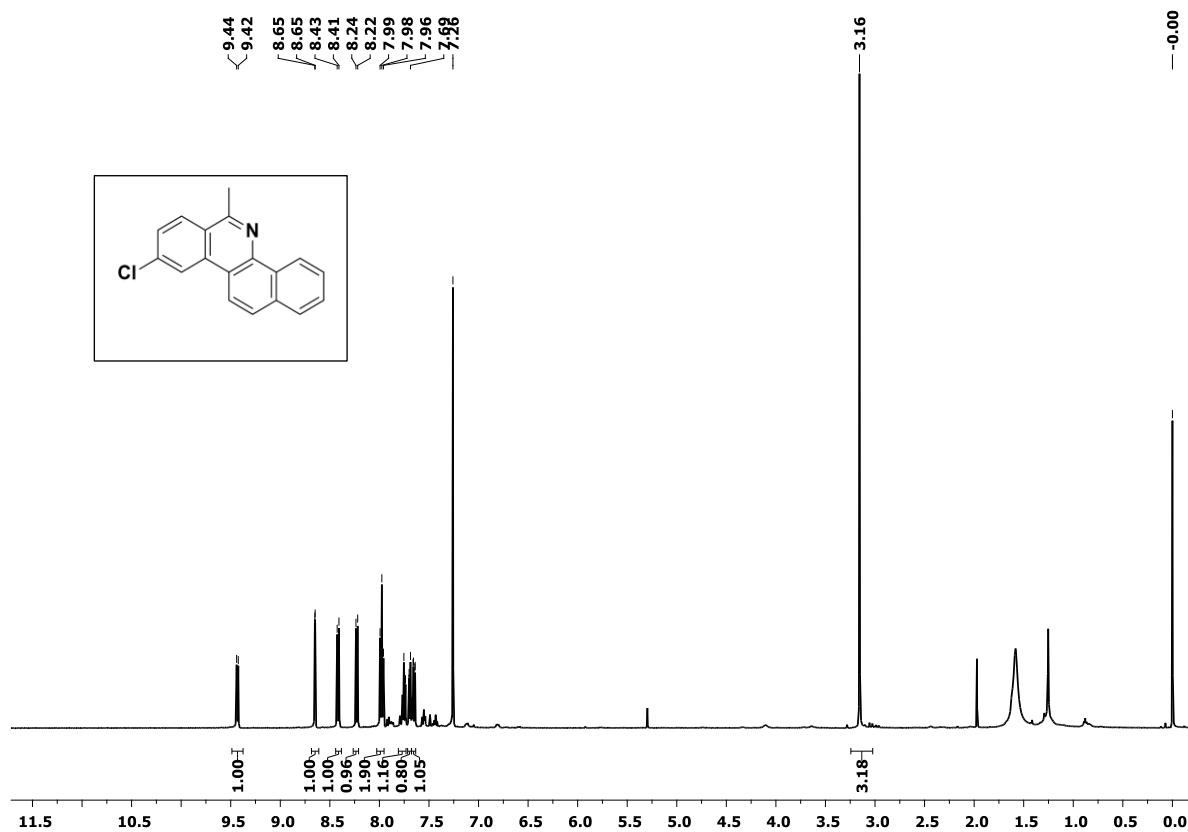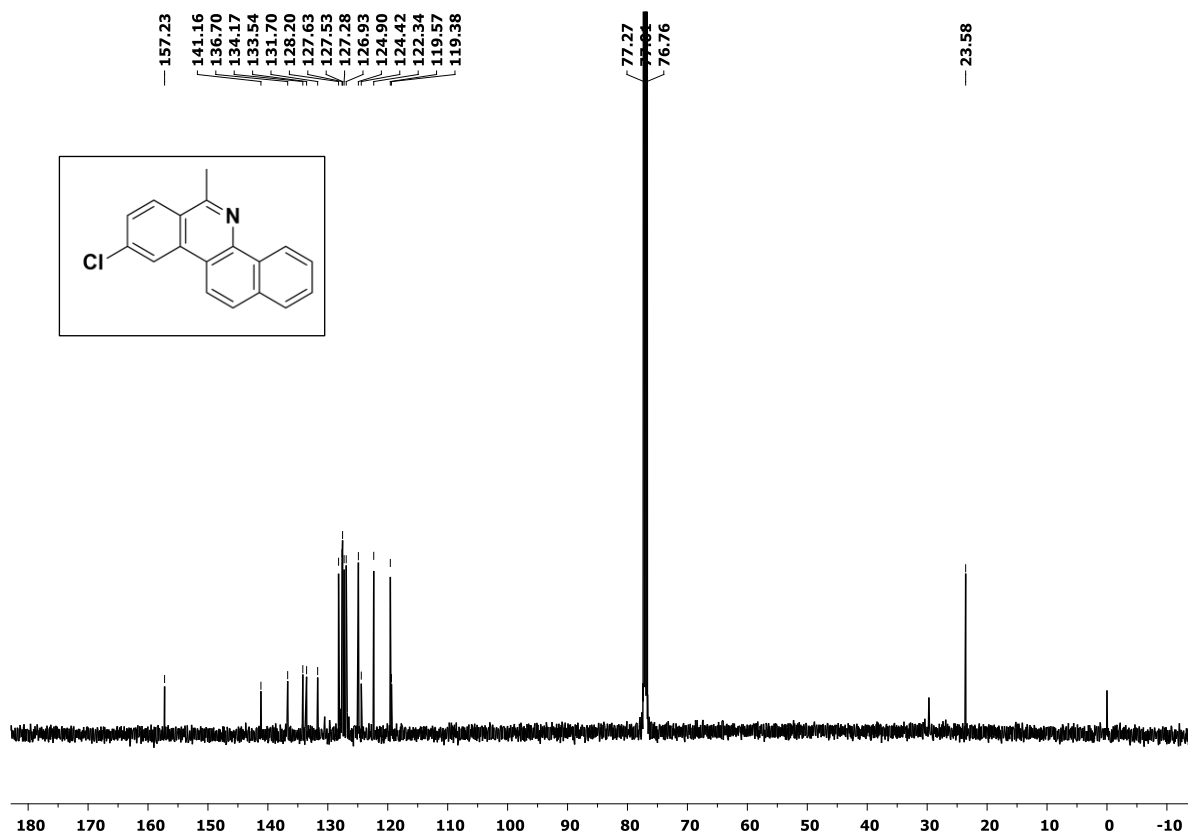



DEPT (135) NMR Spectrum of Compound **5a**.

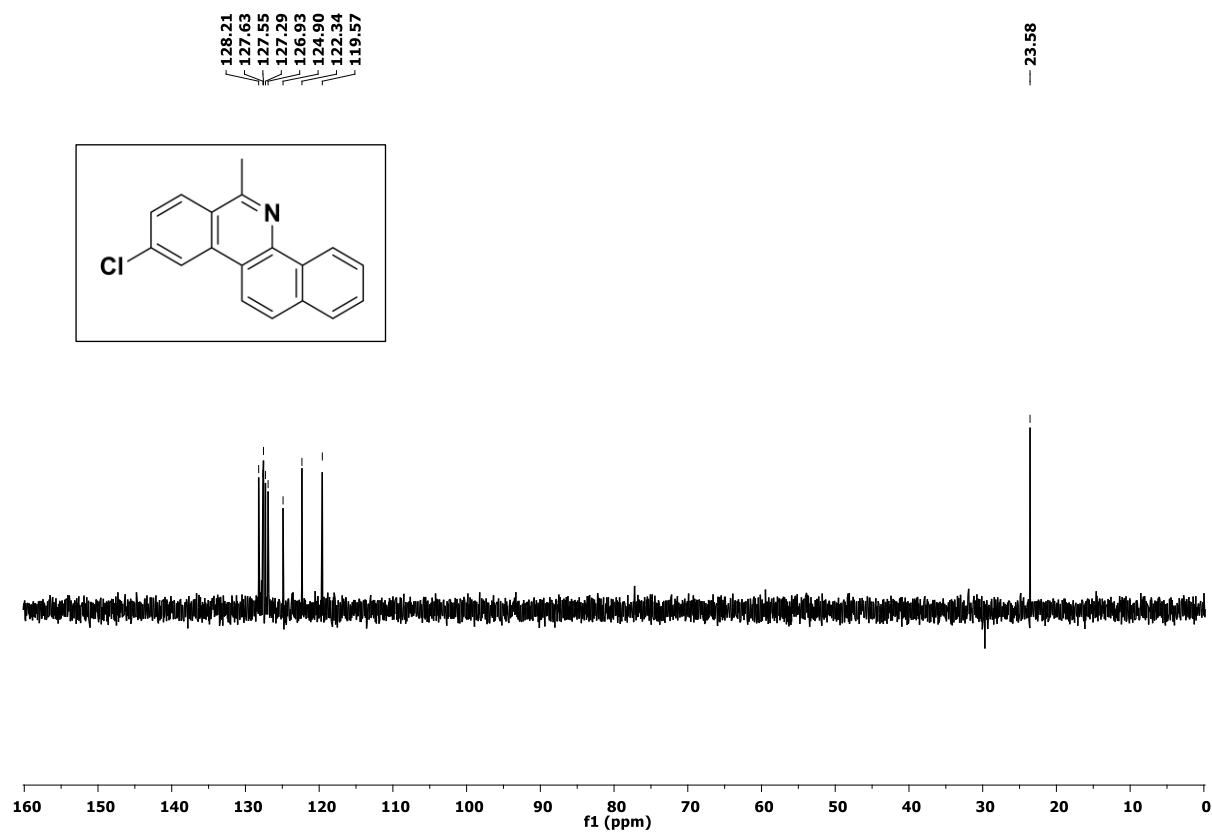



$^1\text{H}$  and  $^{13}\text{C}$  NMR Spectra of Compound **5b**.

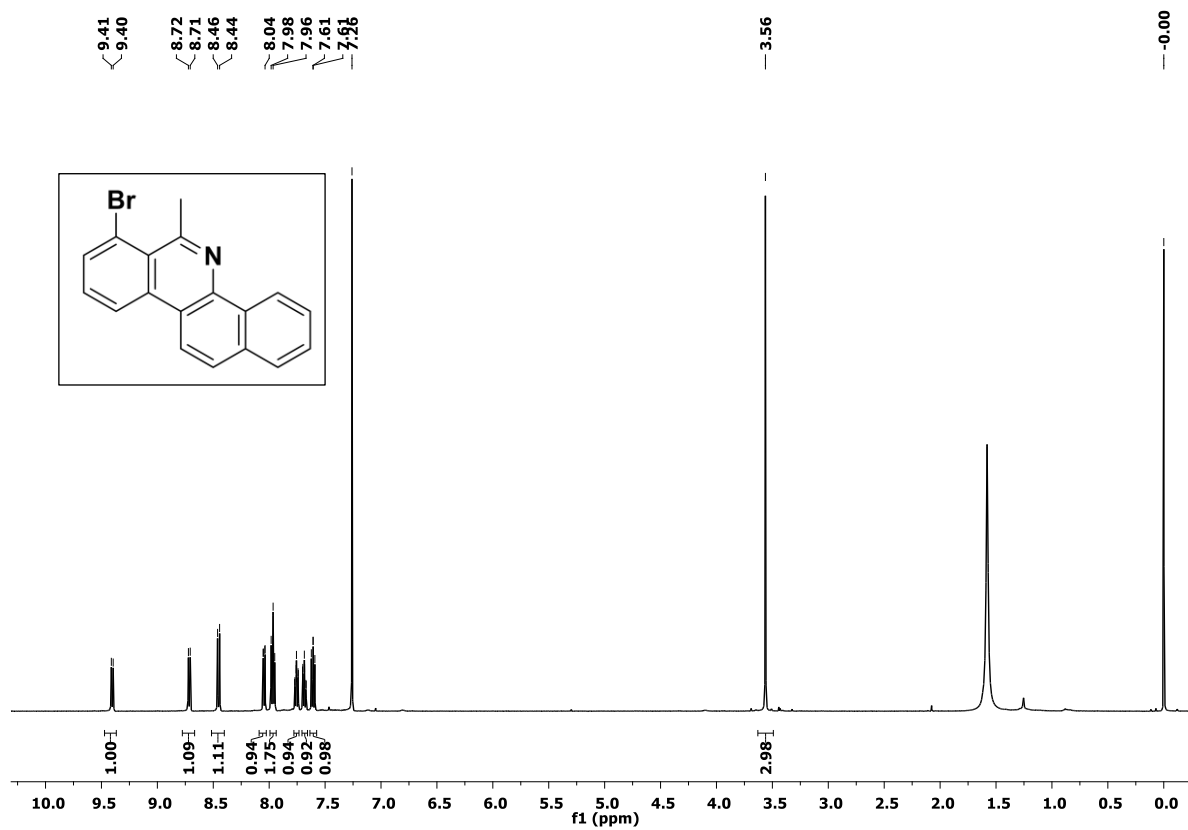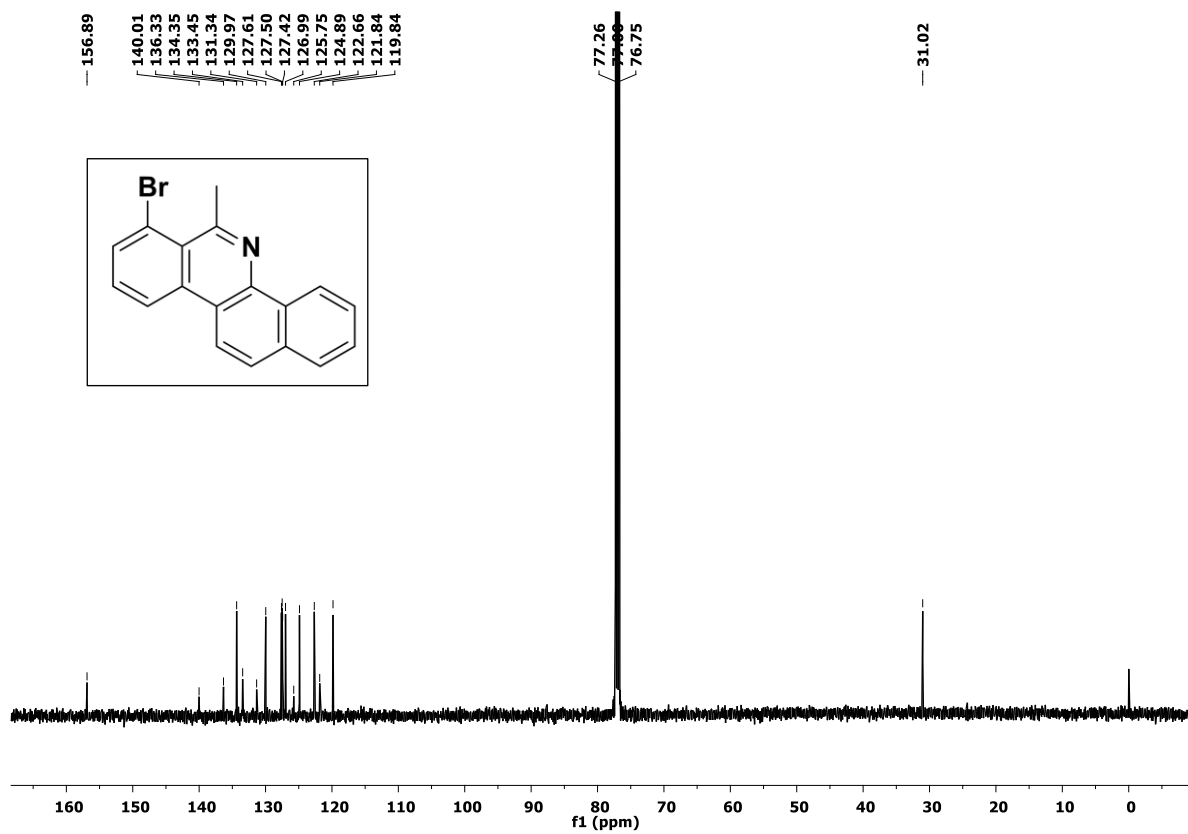



DEPT (135) NMR Spectrum of Compound **5b**.

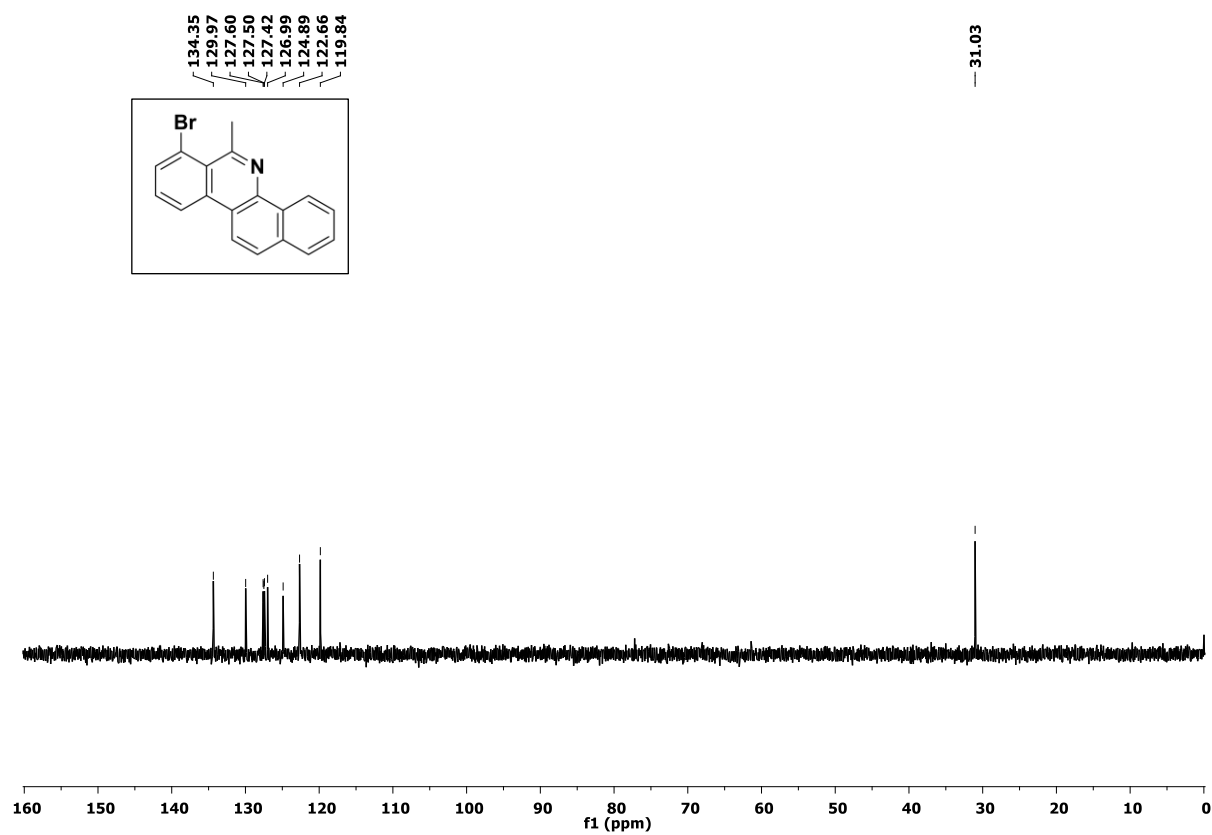

Supplement: Supplementary file 1 [file 19666505]
